# Supplementary material
Source: PubMed Central journal article supplement (PMC5096818)

**A**

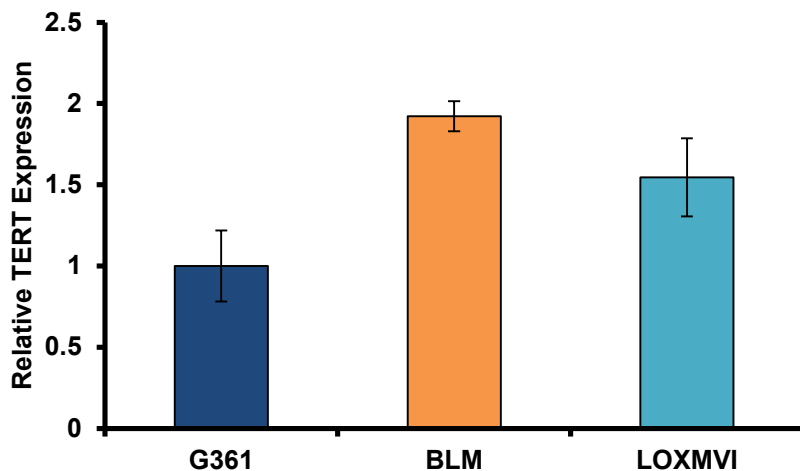

**B**

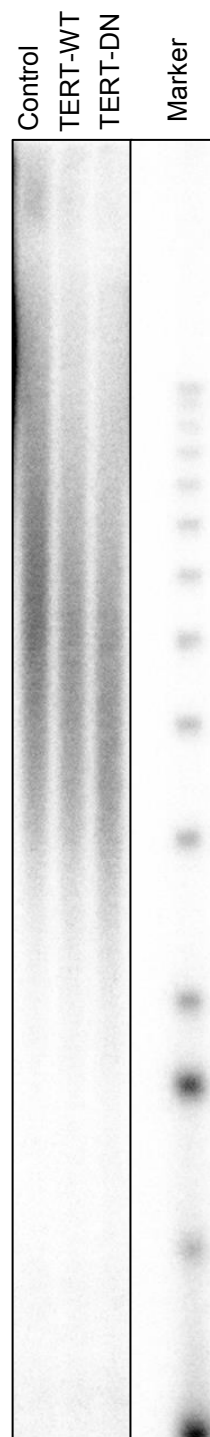

**C**

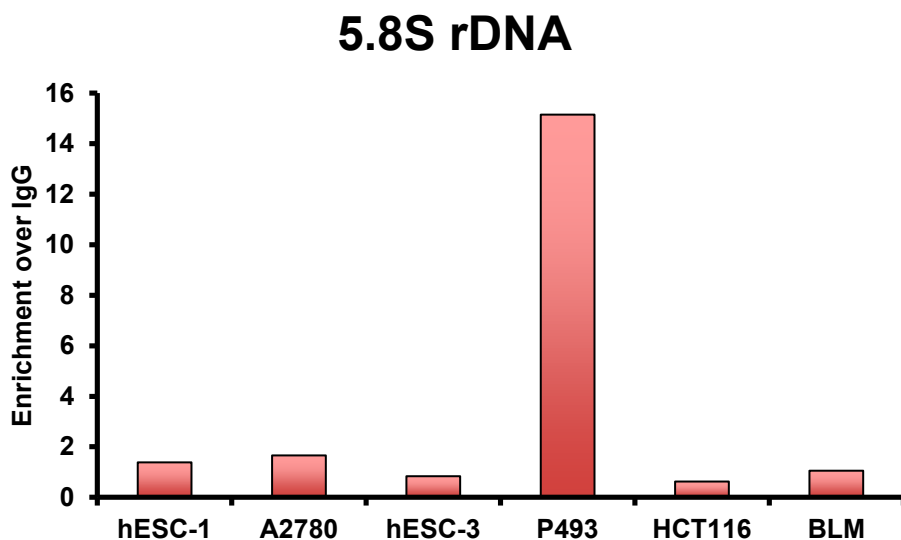

**Figure S1.** (A) Relative *TERT* expression in melanoma cell lines. Actin was used to normalize the expression levels. Error bars indicate mean $\pm$ SD, n=3.(B) Teloblot analysis in HCT116 cells infected with control vector, TERT WT or TERT DN vectors. (C) ChIP using antibodies against TERT and IgG in indicated cell lines, followed by qPCR with primers specific for 5.8S rDNA promoter, n=3.

A

|                       | BLM | LOXIMVI | A2780 | HCT116 | P493 | hESC-1 | hESC-3 |
|-----------------------|-----|---------|-------|--------|------|--------|--------|
| INTERGENIC            | 263 | 246     | 102   | 27     | 316  | 326    | 241    |
| PROMOTER (TSS)        | 58  | 74      | 25    | 10     | 87   | 74     | 53     |
| INTRON                | 22  | 20      | 18    | 6      | 50   | 52     | 37     |
| TTS                   | 7   | 7       | 2     | 1      | 9    | 8      | 8      |
| NON-CODING            | 2   | 3       | 2     | 1      | 7    | 3      | 4      |
| 3'UTR                 | 1   | 1       | 0     | 0      | 0    | 0      | 1      |
| EXON                  | 2   | 2       | 0     | 0      | 3    | 0      | 1      |
| NA                    | 2   | 2       | 1     | 1      | 2    | 1      | 0      |
| Total Number of Peaks | 357 | 355     | 150   | 46     | 474  | 464    | 345    |

B

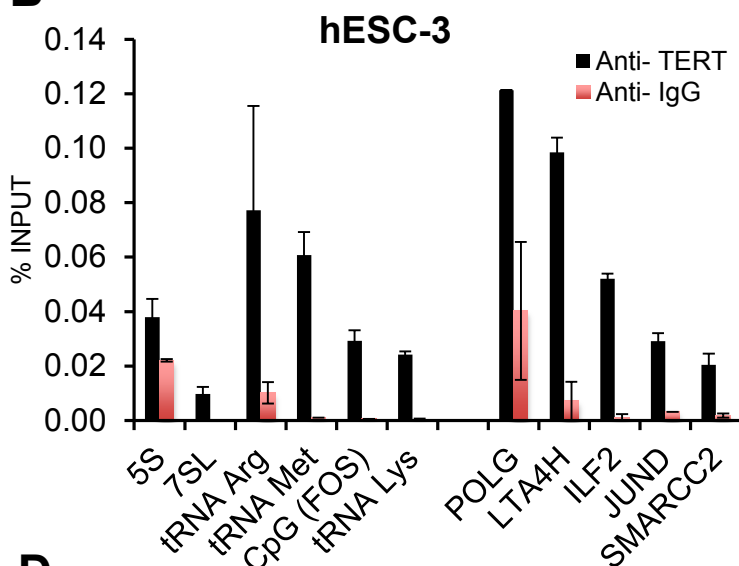

C

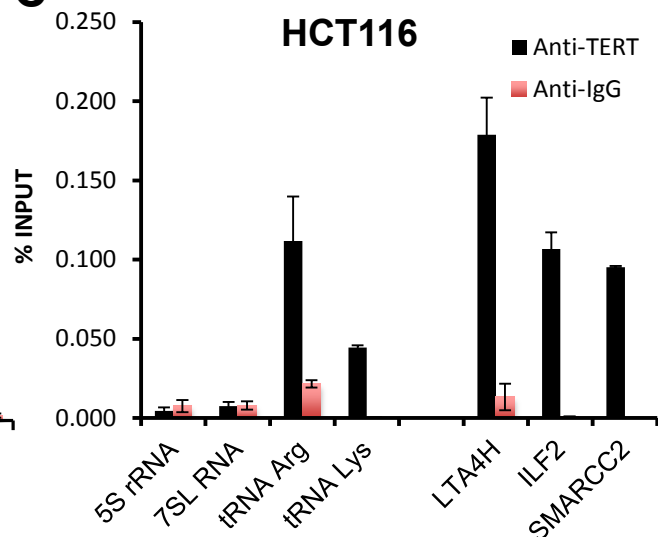

D

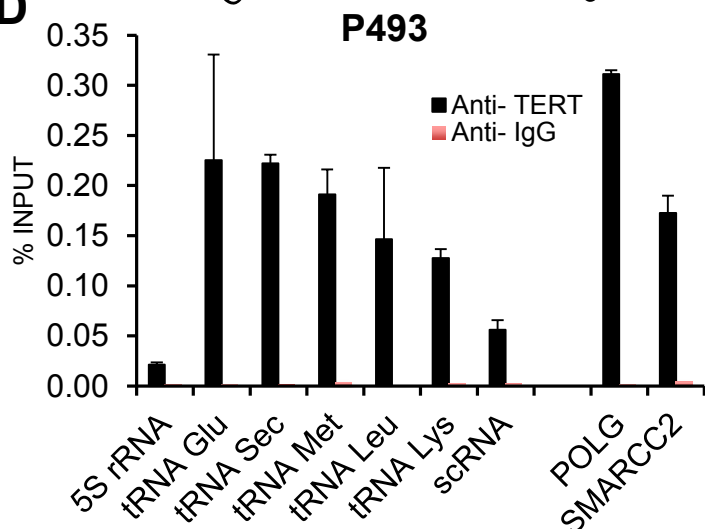

E

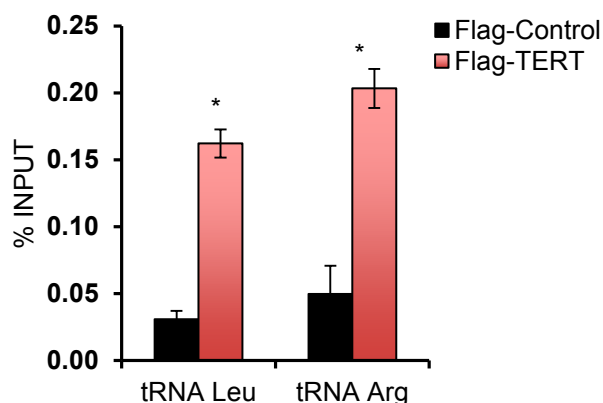

**Figure S2.** (A) Table shows annotation of ChIP-Seq peaks obtained in various cell lines indicated in the first column. (B)-(D) ChIP using TERT and IgG antibodies, followed by qRT-PCR with primers specific for indicated target regions (x-axis) and cell lines (indicated as graph heading). (E) HCT116 cells were infected with vectors expressing Flag control vector and Flag tagged TERT vector. After 4 days of infection, cells were processed for ChIP using flag antibody followed by qRT-PCR with primers specific for indicated target regions (x-axis). Student's t test was performed for statistical analysis. \* indicates p value < 0.05. Error bars indicate mean  $\pm$  SD, n=3.

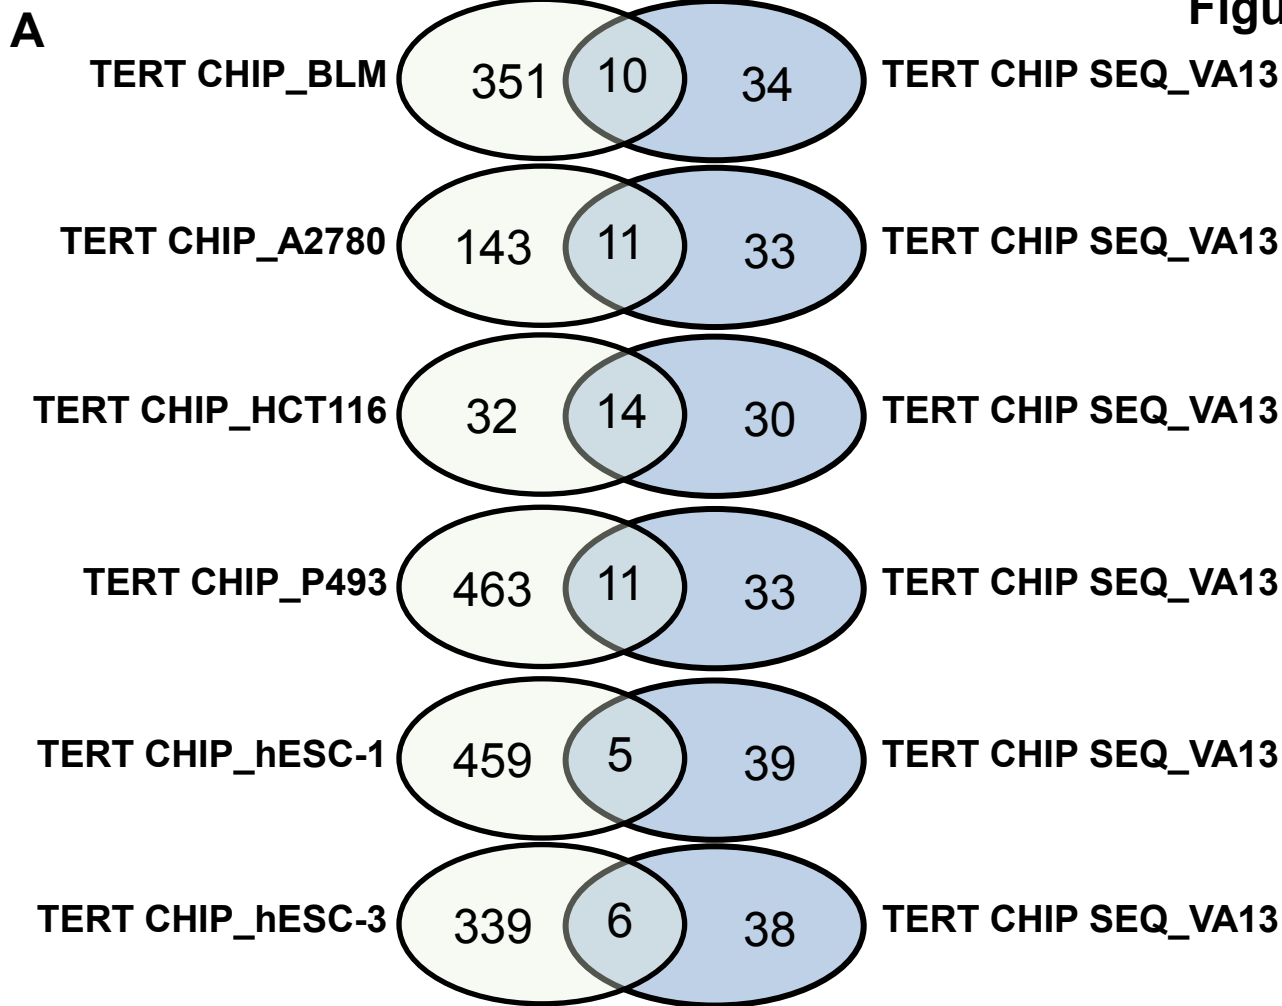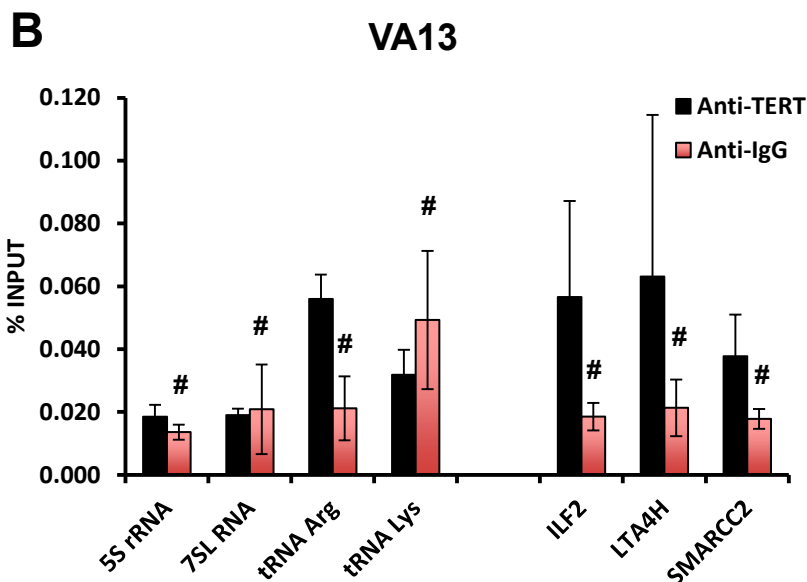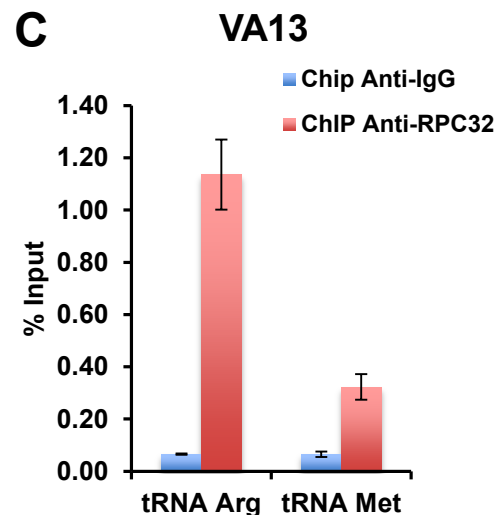

**Figure S3.** (A) Overlap of TERT ChIP-Seq peaks for VA13 with TERT ChIP Seq peaks from indicated cell types. (B) ChIP using TERT and IgG antibodies, followed by qRT-PCR with primers specific for indicated target regions in VA13 cells. (C) ChIP-qPCR analysis of RPC32 and IgG from VA13 cells on tRNA Arg and tRNA Met. Error bars indicate mean $\pm$ SD, n=3, #pvalue > 0.05, non-significant.

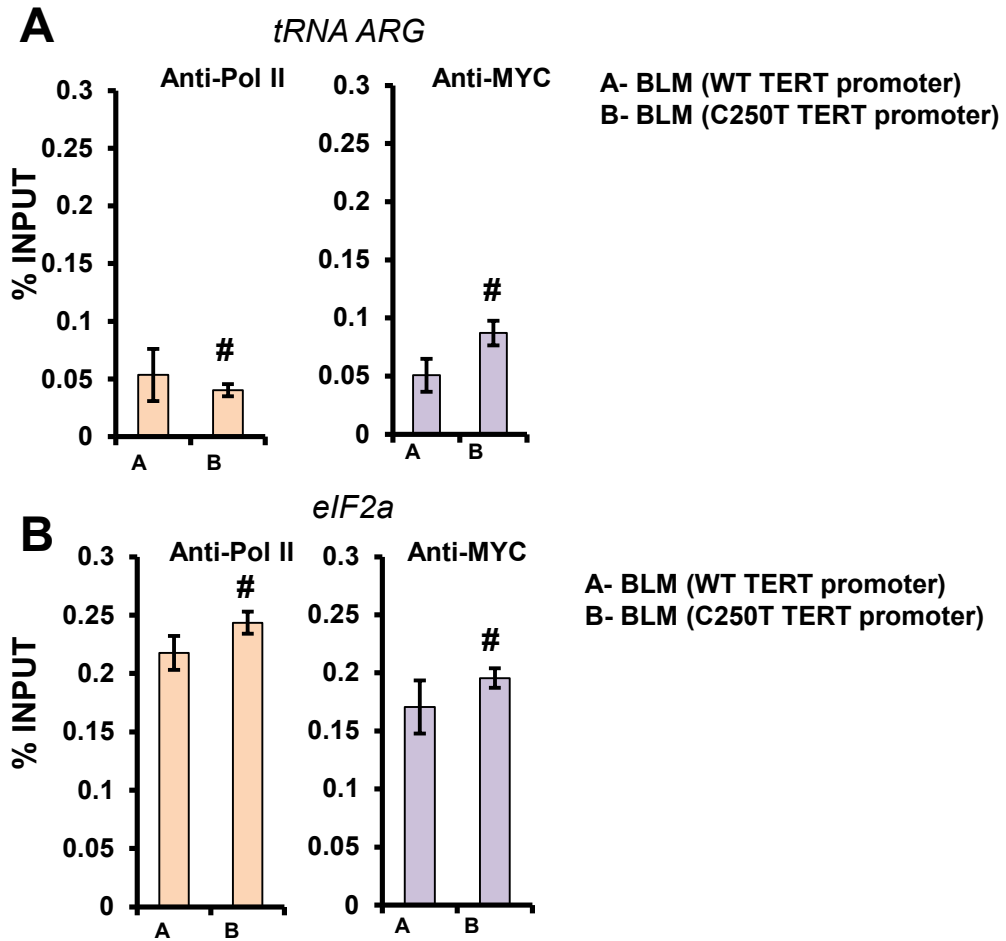

**Figure S4.** (A-B) CHIP was performed in BLM WT and BLM C250T cells against RNA polymerase II (POL II) and MYC antibody followed by q-PCR with primers specific for *tRNA ARG* encoding genomic region and *eIF2 $\alpha$*  promoter. Error bars indicate mean $\pm$ SD, n=3. Student's t test was performed and # indicates pvalue > 0.05, non-significant; \* indicates pvalue<0.05, significant.

A

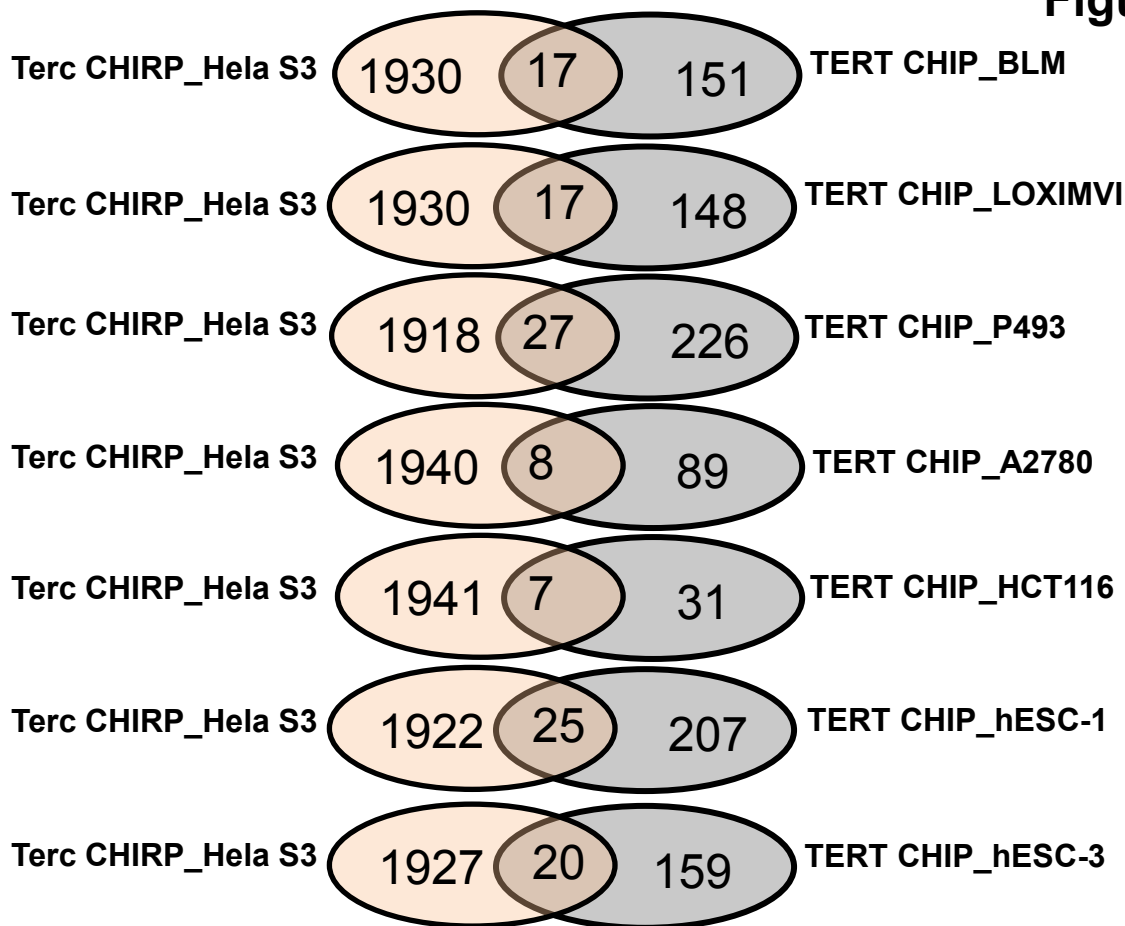

B

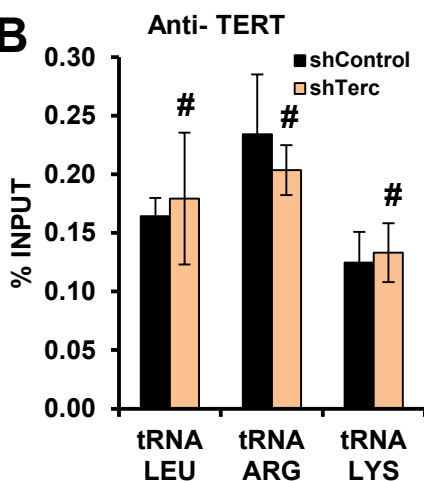

C

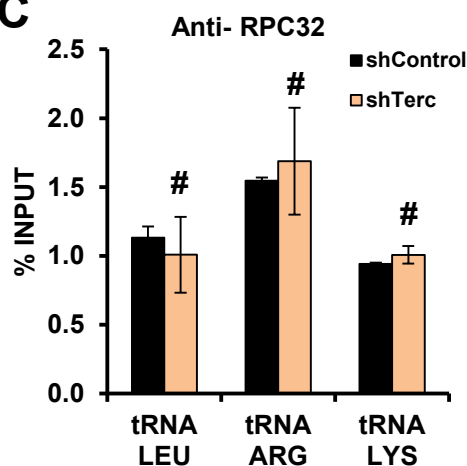

D

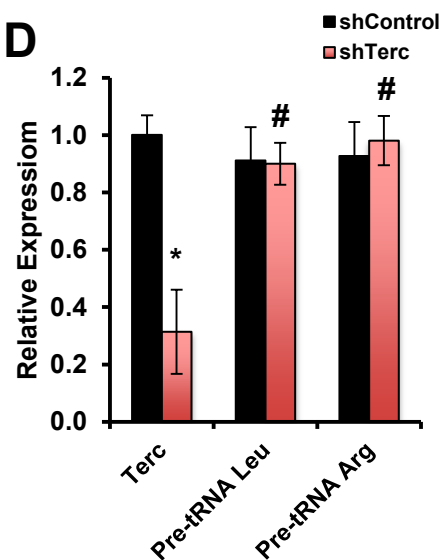

**Figure S5.** (A) Overlap between genes associated with the peaks obtained from TERT ChIP-Seq and TERC ChIRP. The overlapping peaks are excluded from TERT ChIP-Seq peaks obtained in telomerase negative cell line VA13. (C-D) ChIP was performed in BLM cells infected with shControl vector or shTerc vector (after 72h) against TERT and RPC32 proteins. Graph shows the % INPUT obtained upon qPCR using target regions indicated on X-axis. (E) qPCR analysis of target genes in BLM cells infected with shControl vector or shTerc vector after 72h. Actin was used for normalization. Error bars indicate mean±SD, n=3. Student's t test was performed and # indicates pvalue > 0.05, non-significant; \* indicates pvalue < 0.05, significant.

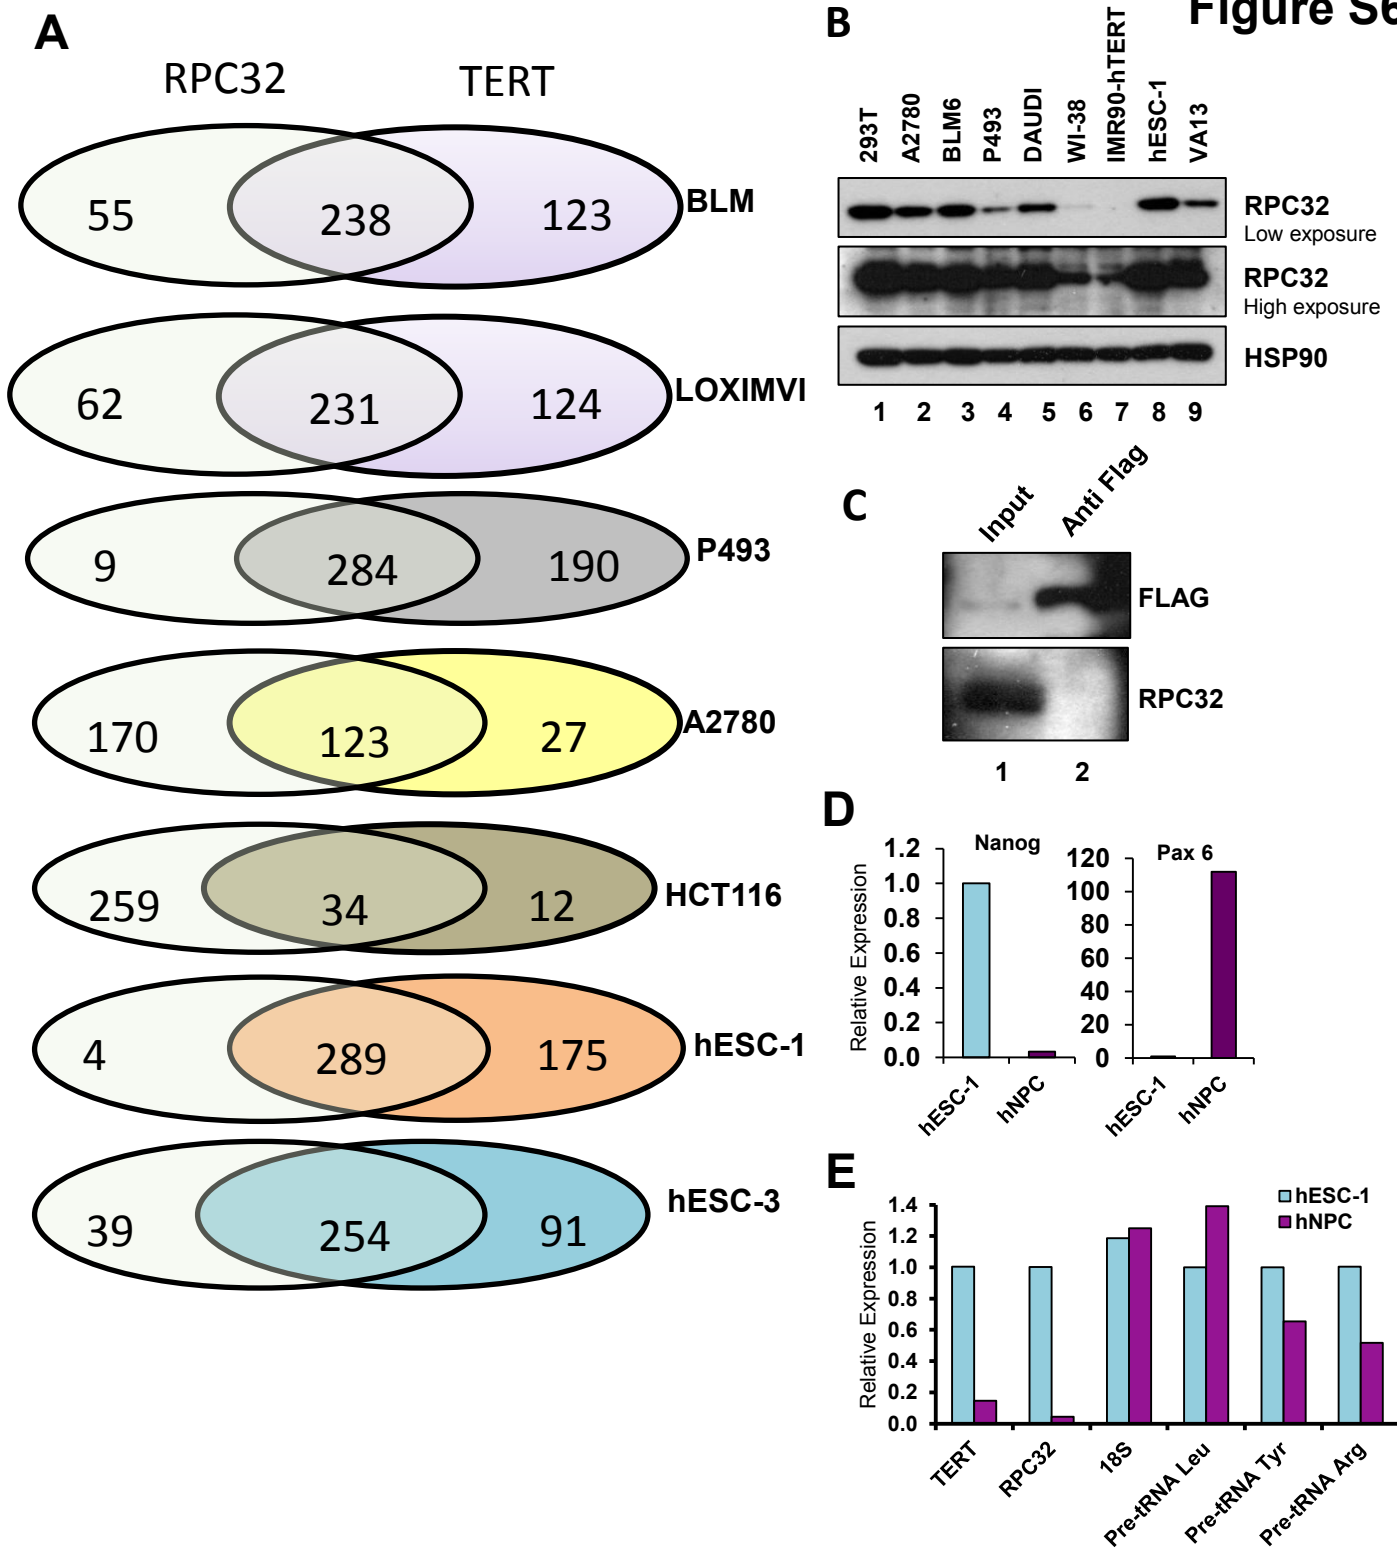

**Figure S6.** (A) Overlap of ChIP-Seq peaks for RPC32 (in IMR90-TERT cells) and TERT from various cell types. (B) Western blotting of RPC32 and HSP90 in various cell lines as indicated. (C) Immunoprecipitation analysis using Flag beads was performed and gel shows western blotting with indicated antibodies using IMR-90-hTERT flag cells. (D) Human Embryonic stem cells-1 line (hESC-1) were differentiated into Neural progenitor cells (NPC). RNA was extracted and graph shows the expression of genes listed as graph heading. n=1. (E) Samples from (E) were analyzed for expression of indicated genes on x-axis.

**Figure S7**

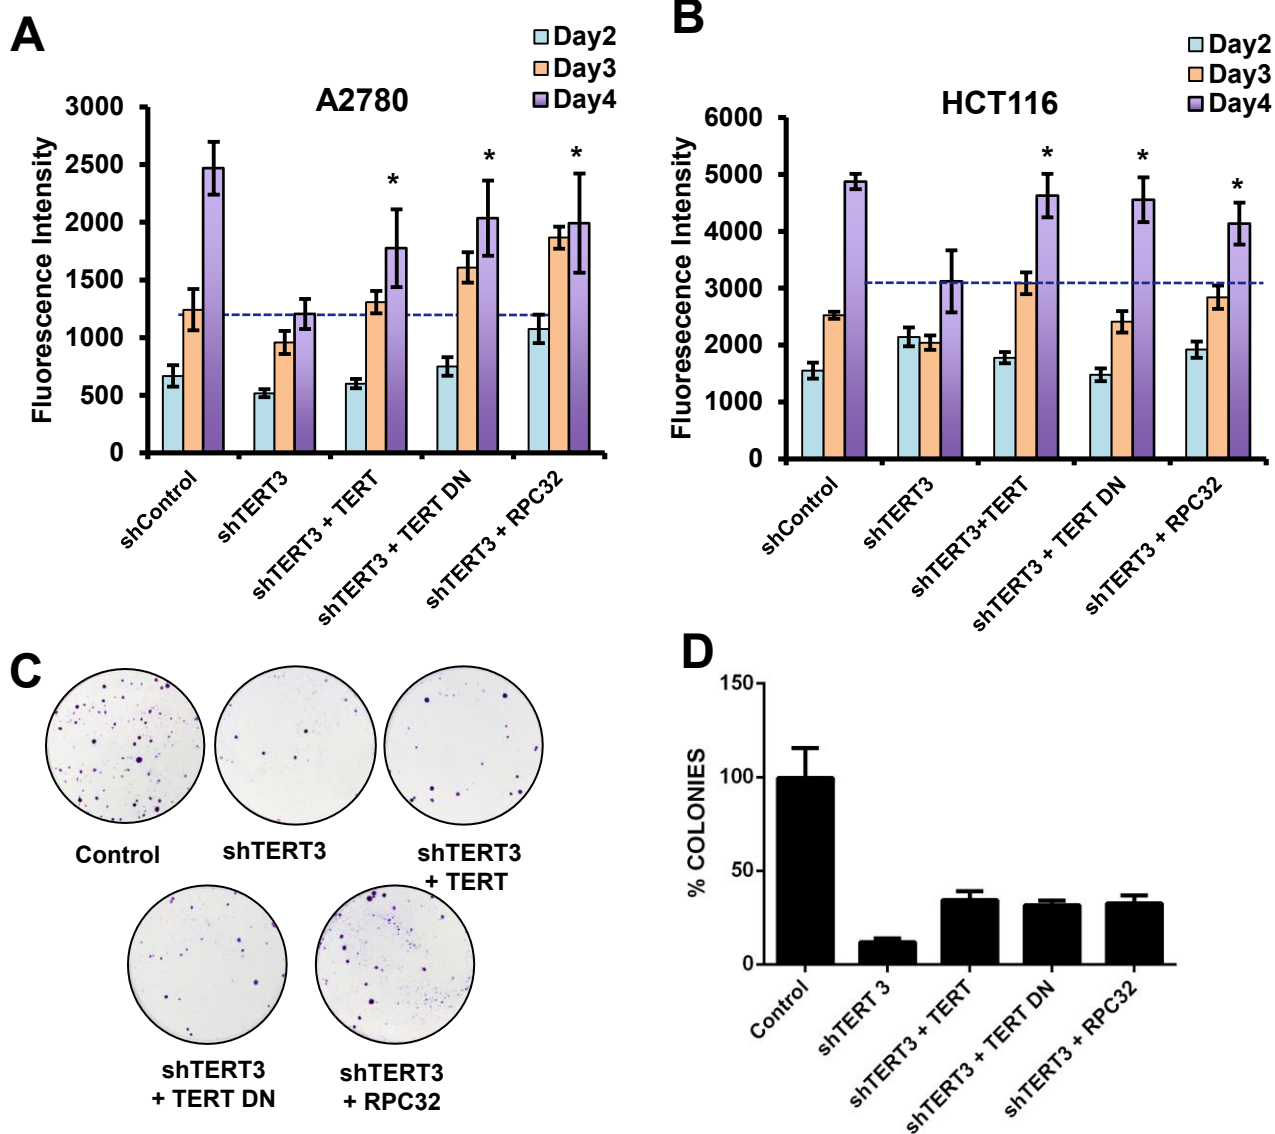

**Figure S7.** (A-B) Cell proliferation in HCT and A2780 cells infected shControl, shTERT1, shTERT3, shTERT3 + TERT, shTERT3 + TERT DN and shTERT3 + RPC32. Graph shows fluorescence intensity measured using alamar blue viability assay (C) Colony formation in HCT cells infected shControl, shTERT3, shTERT3 + TERT, shTERT3 + TERT DN and shTERT3 + RPC32. (D) Quantification of colony formation in (C). Error bars indicate mean $\pm$ SD, n=3. 1-way ANOVA with Tukey's multiple comparison test was performed and \* indicates pvalue<0.05, significant.

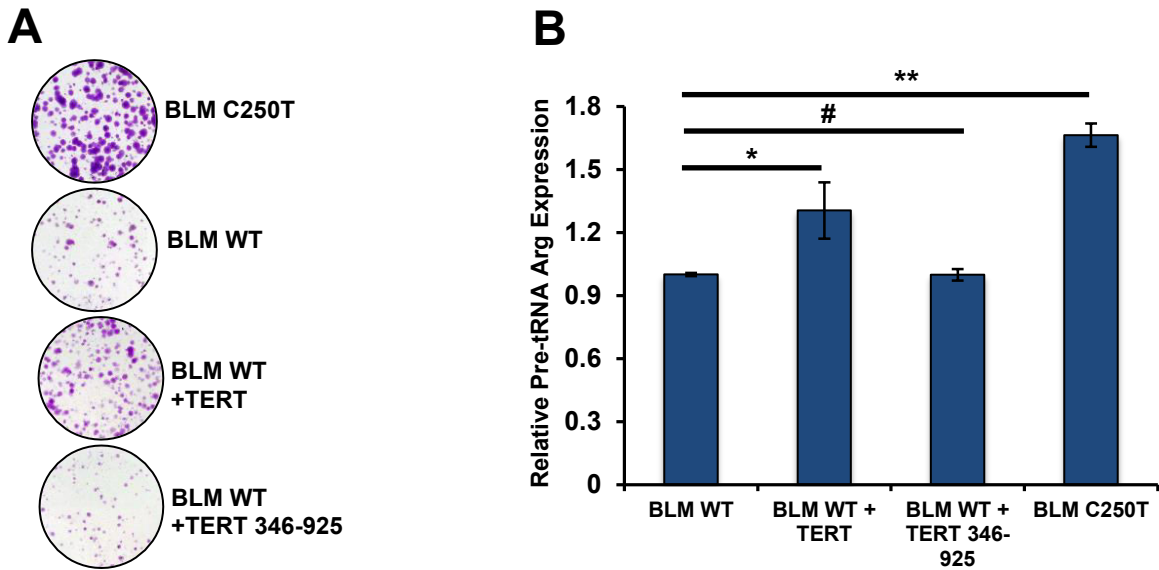

**Figure S8.** (A) Colony formation assay in BLM C250T, BLM WT cells or BLM WT infected with TERT or TERT 346-925. (B) Graph shows relative expression of Pre-tRNA Arg normalized against actin levels in BLM C250T, BLM WT cells or BLM WT infected with TERT or TERT 346-925. 1-way ANOVA with Tukey's multiple comparison test was performed. \* pvalue < 0.05, significant; # pvalue >0.05, non-significant. Error bars indicate mean $\pm$ SD, n=3.



**Supplementary Table 1**

| PeakID        | Chr   | Start     | End       | Annotation                      | Detailed Annotation               | Distance to TSS | Nearest Prom | Entrez ID | Nearest Unigene | Nearest Refseq    | Nearest Ensembl |
|---------------|-------|-----------|-----------|---------------------------------|-----------------------------------|-----------------|--------------|-----------|-----------------|-------------------|-----------------|
| BLM6_peak_39  | chr1  | 161431589 | 161432286 | Intergenic                      | CpG                               | -43268          | NM_021642    | 2212      | Hs.352642       | NM_021642         | HPRD:0906       |
| BLM6_peak_33  | chr1  | 161416772 | 161417494 | Intergenic                      | CpG                               | -58072          | NM_021642    | 2212      | Hs.352642       | NM_021642         | HPRD:0906       |
| BLM6_peak_36  | chr1  | 161424148 | 161424828 | Intergenic                      | CpG                               | -50717          | NM_021642    | 2212      | Hs.352642       | NM_021642         | HPRD:0906       |
| BLM6_peak_42  | chr1  | 161438952 | 161439659 | Intergenic                      | CpG                               | -35900          | NM_021642    | 2212      | Hs.352642       | NM_021642         | HPRD:0906       |
| BLM6_peak_223 | chr6  | 26322919  | 26323322  | Intergenic                      | Intergenic                        | -37393          | NM_003543    | 8365      | Hs.591790       | NM_003543         | HPRD:11919      |
| BLM6_peak_73  | chr10 | 69524118  | 69524511  | Intergenic                      | tRNA-Ser-TCA [tRNA] tRNA          | -68368          | NM_013266    | 29119     | Hs.21375        | NM_013266         | HPRD:09639      |
| BLM6_peak_283 | chr6  | 27758894  | 27759335  | Intergenic                      | Intergenic                        | 16595           | NM_003519    | 8340      | Hs.137594       | NM_003519         | HPRD:11898      |
| BLM6_peak_227 | chr6  | 26521344  | 26521748  | promoter-TSS (NR_026790)        | promoter-TSS (NR_026790)          | -388            | NR_026790    | 493812    | NR_026790       | ENS00000228223    |                 |
| BLM6_peak_112 | chr14 | 58706447  | 58706843  | Intergenic                      | tRNA-Lys-AAG [tRNA] tRNA          | -4878           | NM_002788    | 5684      | Hs.558799       | NM_002788         | HPRD:01463      |
| BLM6_peak_221 | chr6  | 26312680  | 26313584  | Intergenic                      | Intergenic                        | -27405          | NM_003543    | 8365      | Hs.591790       | NM_003543         | HPRD:11919      |
| BLM6_peak_229 | chr6  | 26537574  | 26538516  | promoter-TSS (NM_006353)        | promoter-TSS (NM_006353)          | -527            | NM_006353    | 10473     | Hs.236774       | NM_006353         |                 |
| BLM6_peak_229 | chr6  | 26556592  | 26557051  | Intergenic                      | tRNA-Lys-AAG [tRNA] tRNA          | 18249           | NM_006353    | 10473     | Hs.236774       | NM_006353         |                 |
| BLM6_peak_29  | chr1  | 161397693 | 161398096 | Intergenic                      | tRNA-Asn-AAC [tRNA] tRNA          | -60221          | NM_001013    | 257177    | Hs.534593       | NM_001013625      | HPRD:13257      |
| BLM6_peak_262 | chr6  | 27487163  | 27487527  | Intergenic                      | tRNA-Gln-CAG [tRNA] tRNA          | -46448          | NM_007149    | 7738      | Hs.158174       | NM_007149         | HPRD:03785      |
| BLM6_peak_224 | chr6  | 26327686  | 26328653  | Intergenic                      | Intergenic                        | -37218          | NR_001197    | 11118     | Hs.376046       | NM_007047         | HPRD:12547      |
| BLM6_peak_91  | chr12 | 125411740 | 125412593 | Intergenic                      | Intergenic                        | 12073           | NR_049820    | 100847004 | NR_049820       | miRBase:MI0018167 |                 |
| BLM6_peak_140 | chr16 | 57333745  | 57334627  | Intergenic                      | AluB SINE Alu                     | -15602          | NM_015993    | 51090     | Hs.632215       | NM_015993         | HPRD:11854      |
| BLM6_peak_203 | chr5  | 140098373 | 140098821 | promoter-TSS (NR_026704)        | promoter-TSS (NR_026704)          | 86              | NR_026704    | 56663     | NR_026704       | ENS00000202111    |                 |
| BLM6_peak_225 | chr6  | 26330308  | 26330750  | Intergenic                      | tRNA-Met-I [tRNA] tRNA            | -34858          | NM_001197    | 11118     | Hs.376046       | NM_007047         | HPRD:12547      |
| BLM6_peak_204 | chr5  | 140105629 | 140106085 | TTS (NR_026705)                 | TTS (NR_026705)                   | 113             | NR_026705    | 56662     | NR_026705       | ENS00000202515    |                 |
| BLM6_peak_166 | chr17 | 73031045  | 73031455  | intron (NR_110835, intron 2)    | tRNA-Arg-CGG [tRNA] tRNA          | 2588            | NR_110835    | 23510     | Hs.514468       | NM_015353         | HPRD:17176      |
| BLM6_peak_114 | chr14 | 102783246 | 102783658 | promoter-TSS (NM_001267827)     | promoter-TSS (NM_001267827)       | -262            | NM_001267    | 55778     | Hs.743359       | NM_018335         |                 |
| BLM6_peak_25  | chr1  | 153643592 | 153643965 | promoter-TSS (NM_004515)        | promoter-TSS (NM_004515)          | -274            | NM_004515    | 3608      | Hs.75117        | NM_004515         | HPRD:04419      |
| BLM6_peak_15  | chr1  | 145396689 | 145397126 | intron (NM_001039703, intron 1) | tRNA-His-CAY [tRNA] tRNA          | -16284          | NM_213653    | 148738    | Hs.632436       | NM_145277         | HPRD:10521      |
| BLM6_peak_213 | chr5  | 180618503 | 180618922 | intron (NR_108031, intron 1)    | CpG-21583                         | 1796            | NR_108031    | 102577426 | NR_108031       | NR_108031         |                 |
| BLM6_peak_237 | chr6  | 26577200  | 26577577  | Intergenic                      | tRNA-Tyr-TAC [tRNA] tRNA          | -19783          | NM_013375    | 29777     | Hs.254406       | NM_013375         | HPRD:16469      |
| BLM6_peak_148 | chr17 | 8042024   | 8042950   | Intergenic                      | Intergenic                        | 5902            | NR_106943    | 102465532 | NR_106943       | NR_106943         |                 |
| BLM6_peak_138 | chr16 | 22308333  | 22308726  | promoter-TSS (NM_00125803)      | promoter-TSS (NM_00125803)        | -167            | NM_018119    | 55718     | Hs.460298       | NM_018119         | HPRD:15155      |
| BLM6_peak_234 | chr6  | 26568954  | 26569320  | Intergenic                      | tRNA-Tyr-TAC [tRNA] tRNA          | -28034          | NM_013375    | 29777     | Hs.254406       | NM_013375         | HPRD:16469      |
| BLM6_peak_43  | chr1  | 161439991 | 161440362 | Intergenic                      | CpG                               | -35029          | NM_021642    | 2212      | Hs.352642       | NM_021642         | HPRD:0906       |
| BLM6_peak_215 | chr5  | 180634616 | 180635042 | Intergenic                      | tRNA-Lys-AAG [tRNA] tRNA          | -2536           | NM_032993    | 81786     | Hs.487412       | NM_033042         | HPRD:11648      |
| BLM6_peak_70  | chr1  | 249167917 | 249168693 | Intergenic                      | Intergenic                        | -14990          | NM_001193    | 55657     | Hs.377705       | NM_017865         | HPRD:07922      |
| BLM6_peak_14  | chr1  | 145395370 | 145395712 | intron (NM_001039703, intron 1) | tRNA-Lys-AAG [tRNA] tRNA          | -17650          | NM_213653    | 148738    | Hs.632436       | NM_145277         | HPRD:10521      |
| BLM6_peak_34  | chr1  | 161417776 | 161418233 | Intergenic                      | CpG                               | -57201          | NM_021642    | 2212      | Hs.352642       | NM_021642         | HPRD:0906       |
| BLM6_peak_296 | chr6  | 28641453  | 28641822  | Intergenic                      | tRNA-Ala-GCG [tRNA] tRNA          | -86525          | NM_052923    | 114821    | Hs.176980       | NM_052923         | HPRD:11720      |
| BLM6_peak_47  | chr1  | 161509890 | 161510274 | Intergenic                      | tRNA-Asn-AAC [tRNA] tRNA          | 9736            | NM_001127    | 2214      | Hs.372679       | NM_000569         | HPRD:0903       |
| BLM6_peak_281 | chr6  | 27721025  | 27721391  | Intergenic                      | tRNA-Val-GU [tRNA] tRNA           | -8315           | NR_038929    | 100131289 | Hs.200573       | NR_038929         |                 |
| BLM6_peak_342 | chr8  | 67025470  | 67025868  | Intergenic                      | tRNA-Tyr-TAC [tRNA] tRNA          | -13609          | NM_184087    | 84675     | Hs.85524        | NM_033058         | HPRD:05927      |
| BLM6_peak_57  | chr1  | 228754831 | 228755238 | Intergenic                      | CpG                               | -25360          | NR_037962    | 58480     | Hs.647774       | NM_021205         | HPRD:06965      |
| BLM6_peak_66  | chr1  | 228774928 | 228775301 | Intergenic                      | CpG                               | -5280           | NR_037962    | 58480     | Hs.647774       | NM_021205         | HPRD:06965      |
| BLM6_peak_202 | chr5  | 140090753 | 140091143 | promoter-TSS (NR_026703)        | promoter-TSS (NR_026703)          | 87              | NR_026703    | 56664     | NR_026703       | ENS00000199990    |                 |
| BLM6_peak_249 | chr6  | 27247910  | 27248273  | Intergenic                      | tRNA-Val-GTG [tRNA] tRNA          | 31920           | NM_033482    | 94026     | Hs.729955       | NM_033482         | ENS00000158553  |
| BLM6_peak_170 | chr19 | 1383175   | 1383844   | promoter-TSS (NM_024407)        | promoter-TSS (NM_024407)          | -374            | NM_024407    | 374291    | Hs.211914       | NM_024407         |                 |
| BLM6_peak_231 | chr6  | 26554176  | 26554572  | Intergenic                      | tRNA-Ile-ATT [tRNA] tRNA          | 15802           | NM_006353    | 10473     | Hs.236774       | NM_006353         |                 |
| BLM6_peak_69  | chr1  | 228781625 | 228782017 | intron (NR_037962, intron 1)    | CpG-2319                          | 1164            | NR_002834    | 574029    | Hs.647777       | NR_002834         |                 |
| BLM6_peak_271 | chr6  | 27573292  | 27573655  | Intergenic                      | tRNA-Leu-TTG [tRNA] tRNA          | -88341          | NR_038293    | 100507173 | Hs.635987       | NR_038292         |                 |
| BLM6_peak_301 | chr6  | 28696945  | 28697363  | Intergenic                      | tRNA-Ala-GCY [tRNA] tRNA          | 134300          | NR_033379    | 401242    | Hs.448285       | NR_033379         | ENS00000225595  |
| BLM6_peak_345 | chr8  | 124169296 | 124169664 | Intergenic                      | tRNA-Met [tRNA] tRNA              | -21807          | NM_207006    | 84985     | Hs.379821       | NM_032899         | HPRD:17489      |
| BLM6_peak_55  | chr1  | 228750346 | 228750767 | Intergenic                      | CpG                               | -29838          | NR_037962    | 58480     | Hs.647774       | NM_021205         | HPRD:06965      |
| BLM6_peak_165 | chr17 | 73029855  | 73030715  | intron (NR_110835, intron 2)    | intron (NR_110835, intron 2 of 7) | 1623            | NR_110835    | 23510     | Hs.514468       | NM_015353         | HPRD:17176      |
| BLM6_peak_270 | chr6  | 27560441  | 27560825  | Intergenic                      | tRNA-Met-I [tRNA] tRNA            | -101181         | NR_038293    | 100507173 | Hs.635987       | NR_038292         |                 |
| BLM6_peak_317 | chr6  | 28908713  | 28909577  | Intergenic                      | Intergenic                        | -2416           | NR_103538    | 729583    | Hs.453549       | NR_103538         |                 |
| BLM6_peak_136 | chr16 | 14379580  | 14380006  | Intergenic                      | tRNA-Thr-ACG [tRNA] tRNA          | -18031          | NR_030177    | 574455    | NR_030177       | miRBase:MI0003137 |                 |
| BLM6_peak_88  | chr12 | 98897126  | 98897545  | intron (NR_038383, intron 1)    | tRNA-Asp-GAY [tRNA] tRNA          | 298             | NR_038383    | 643770    | Hs.129589       | NR_038383         | ENS00000245017  |
| BLM6_peak_145 | chr17 | 8022917   | 8023879   | TTS (NM_032580)                 | TTS (NM_032580)                   | -1164           | NM_001165    | 59344     | Hs.232770       | NM_012628         | HPRD:06231      |
| BLM6_peak_59  | chr1  | 228759244 | 228759630 | Intergenic                      | CpG                               | -20957          | NR_037962    | 58480     | Hs.647774       | NM_021205         | HPRD:06965      |
| BLM6_peak_228 | chr6  | 26532977  | 26533344  | Intergenic                      | tRNA-Thr-ACY [tRNA] tRNA          | -5412           | NM_006353    | 10473     | Hs.236774       | NM_006353         |                 |
| BLM6_peak_76  | chr11 | 59317939  | 59319468  | Intergenic                      | Intergenic                        | 36317           | NM_001004    | 390199    | Hs.553757       | NM_001004         | HPRD:17728      |
| BLM6_peak_4   | chr1  | 16872355  | 16872630  | Intergenic                      | tRNA-Gly-GGG [tRNA] tRNA          | 2967            | NR_037446    | 100500876 | NR_037446       | miRBase:MI0016076 |                 |
| BLM6_peak_216 | chr5  | 180645048 | 180645462 | Intergenic                      | Intergenic                        | 4375            | NR_037881    | 100516342 | NR_037881       | miRBase:MI0017265 |                 |
| BLM6_peak_278 | chr6  | 27655838  | 27656333  | Intergenic                      | Intergenic                        | 5719            | NR_038293    | 100507173 | Hs.635987       | NR_038292         |                 |
| BLM6_peak_274 | chr6  | 27636247  | 27636634  | Intergenic                      | Intergenic                        | -25374          | NR_038293    | 100507173 | Hs.635987       | NR_038292         |                 |
| BLM6_peak_116 | chr15 | 40885852  | 40886233  | promoter-TSS (NM_144508)        | promoter-TSS (NM_144508)          | -410            | NM_170589    | 57082     | Hs.181855       | NM_144508         | HPRD:10634      |
| BLM6_peak_40  | chr1  | 161432669 | 161433007 | Intergenic                      | CpG                               | -42367          | NM_021642    | 2212      | Hs.352642       | NM_021642         | HPRD:0906       |
| BLM6_peak_58  | chr1  | 228757046 | 228757410 | Intergenic                      | CpG                               | -23166          | NR_037962    | 58480     | Hs.647774       | NM_021205         | HPRD:06965      |
| BLM6_peak_275 | chr6  | 27638135  | 27638558  | Intergenic                      | tRNA-Arg-CGY [tRNA] tRNA          | -23468          | NR_038293    | 100507173 | Hs.635987       | NR_038292         |                 |
| BLM6_peak_80  | chr11 | 59333674  | 59334053  | Intergenic                      | tRNA-Phe-TTY [tRNA] tRNA          | 28768           | NR_036120    | 100422880 | NR_036120       | NR_036120         |                 |
| BLM6_peak_217 | chr5  | 180648811 | 180649618 | TTS (NR_039781)                 | TTS (NR_039781)                   | 419             | NR_039781    | 100616342 | NR_039781       | miRBase:MI0017265 |                 |
| BLM6_peak_214 | chr5  | 180633738 | 180634085 | Intergenic                      | tRNA-Ala-GCG [tRNA] tRNA          | -1618           | NM_202993    | 81786     | Hs.487412       | NM_033342         | HPRD:11648      |
| BLM6_peak_152 | chr17 | 8125379   | 8125766   | intron (NR_026951, intron 2)    | tRNA-Asp-GAY [tRNA] tRNA          | 1789            | NR_026951    | 284029    | Hs.121692       | NM_173621         | HPRD:08755      |
| BLM6_peak_49  | chr1  | 161591311 | 161591683 | Intergenic                      | tRNA-Asn-AAC [tRNA] tRNA          | 9340            | NM_001271    | 2215      | Hs.372679       | NM_000570         | HPRD:09951      |
| BLM6_peak_127 | chr16 | 3207210   | 3207260   | Intergenic                      | tRNA-Lys-AAG [tRNA] tRNA          | 22274           | NM_001134    | 7760      | Hs.115284       | NM_002200         | HPRD:12224      |
| BLM6_peak_13  | chr1  | 94312982  | 94313387  | promoter-TSS (NM_00126140)      | promoter-TSS (NM_00126140)        | -478            | NM_001261    | 8412      | Hs.36958        | NM_003567         | HPRD:05268      |
| BLM6_peak_153 | chr17 | 8125971   | 8126357   | non-coding (NR_026951, exon 2)  | non-coding (NR_026951, exon 2)    | 1197            | NR_026951    | 284029    | Hs.121692       | NM_173621         | HPRD:08755      |
| BLM6_peak_265 | chr6  | 27515373  | 27515700  | Intergenic                      | tRNA-Gln-CAG [tRNA] tRNA          | -74639          | NM_007149    | 7738      | Hs.158174       | NM_007149         | HPRD:03785      |
| BLM6_peak_46  | chr1  | 161500742 | 161501145 | Intergenic                      | tRNA-Gly-GAG [tRNA] tRNA          | 6907            | NM_002155    | 3310      | Hs.654614       | NM_002155         | HPRD:00775      |
| BLM6_peak_119 | chr15 |           |           |                                 |                                   |                 |              |           |                 |                   |                 |

|               |       |           |           |                                     |                                     |         |           |           |             |                    |                 |
|---------------|-------|-----------|-----------|-------------------------------------|-------------------------------------|---------|-----------|-----------|-------------|--------------------|-----------------|
| BLM6_peak_1   | chr17 | 8124736   | 8125103   | intron (NR_026951, intron 2 of 3)   | CpG                                 | 2442    | NR_026951 | 284029    | Hs.121692   | NM_173621          | HPRD:08755      |
| BLM6_peak_90  | chr12 | 125406137 | 125406490 | Intergenic                          | tRNA-Ala-GCG [tRNA] tRNA            | 6220    | NR_049820 | 100847004 | NR_049820   | miRBase:MI0018167  |                 |
| BLM6_peak_248 | chr6  | 27205160  | 27205561  | Intergenic                          | tRNA-Ile-ATT [tRNA] tRNA            | -10142  | NM_005865 | 10279     | Hs.274407   | NM_005865          | HPRD:06205      |
| BLM6_peak_65  | chr1  | 228727698 | 228773094 | Intergenic                          | CpG                                 | -7498   | NR_037962 | 58480     | Hs.647774   | NM_021205          | HPRD:06965      |
| BLM6_peak_106 | chr14 | 21151340  | 21151726  | promoter-TSS (NM_001145)            | promoter-TSS (NM_001145)            | -803    | NM_001145 | 283       | Hs.283749   | NM_001145          | HPRD:00105      |
| BLM6_peak_323 | chr6  | 28949850  | 28950211  | Intergenic                          | tRNA-Glu-GAG [tRNA] tRNA            | 23007   | NM_001010 | 282890    | NM.01010877 | NM_001010877       | HPRD:18325      |
| BLM6_peak_156 | chr17 | 29877002  | 29877357  | Intergenic                          | Intergenic                          | -9836   | NR_029710 | 406968    | NR_029710   | miRBase:MI00000487 |                 |
| BLM6_peak_180 | chr2  | 27273556  | 27274295  | promoter-TSS (NM_021831)            | promoter-TSS (NM_021831)            | -566    | NM_021831 | 60509     | Hs.138207   | NM_021831          | HPRD:07968      |
| BLM6_peak_123 | chr15 | 89878161  | 89878558  | promoter-TSS (NM_00112613)          | promoter-TSS (NM_00112613)          | -333    | NM_002693 | 5428      | Hs.706868   | NM_002693          | HPRD:01438      |
| BLM6_peak_117 | chr15 | 45490620  | 45491029  | intron (NM_138356, intron 2 of 3)   | tRNA-His-CAY [tRNA] tRNA            | 2549    | NM_138356 | 90525     | Hs.310399   | NM_138356          | HPRD:14272      |
| BLM6_peak_45  | chr1  | 161499970 | 161500346 | Intergenic                          | tRNA-Leu-CTG [tRNA] tRNA            | 6122    | NM_002155 | 3310      | Hs.654614   | NM_002155          | HPRD:00775      |
| BLM6_peak_146 | chr17 | 8024102   | 8024475   | 3' UTR (NM_032580, exon 4 of 4)     | 3' UTR (NM_032580, exon 4 of 4)     | -2054   | NM_001165 | 59344     | Hs.232770   | NM_001165          | HPRD:06231      |
| BLM6_peak_44  | chr1  | 161493472 | 161493868 | promoter-TSS (NM_002155)            | promoter-TSS (NM_002155)            | -366    | NM_002155 | 3310      | Hs.654614   | NM_002155          | HPRD:00775      |
| BLM6_peak_328 | chr6  | 144537539 | 144537900 | Intergenic                          | tRNA-Leu-TTA [tRNA] tRNA            | 66065   | NM_003764 | 8676      | Hs.118958   | NM_003764          |                 |
| BLM6_peak_143 | chr16 | 87417472  | 87417823  | promoter-TSS (NM_024735)            | promoter-TSS (NM_024735)            | -248    | NM_024735 | 79791     | Hs.567582   | NM_024735          |                 |
| BLM6_peak_289 | chr6  | 28510714  | 28511096  | Intergenic                          | tRNA-Arg-CGA [tRNA] tRNA            | 17116   | NM_003996 | 2880      | Hs.248129   | NM_003996          | HPRD:11941      |
| BLM6_peak_171 | chr19 | 4723957   | 4724826   | promoter-TSS (NM_139159)            | promoter-TSS (NM_139159)            | -541    | NM_139159 | 91039     | Hs.515081   | NM_139159          | HPRD:07001      |
| BLM6_peak_62  | chr1  | 228768002 | 228768353 | Intergenic                          | CpG                                 | -14217  | NR_037962 | 58480     | Hs.647774   | NM_021205          | HPRD:06965      |
| BLM6_peak_230 | chr6  | 26553573  | 26553965  | Intergenic                          | tRNA-Ala-GCG [tRNA] tRNA            | 15197   | NM_006353 | 10473     | Hs.236774   | NM_006353          |                 |
| BLM6_peak_284 | chr6  | 27763473  | 27763866  | Intergenic                          | tRNA-Gln-CAA [tRNA] tRNA            | 12040   | NM_003519 | 8340      | Hs.137594   | NM_003519          | HPRD:11898      |
| BLM6_peak_126 | chr16 | 3202753   | 3203221   | Intergenic                          | Intergenic                          | 17853   | NM_001134 | 7760      | Hs.115284   | NM_004220          | HPRD:12224      |
| BLM6_peak_79  | chr11 | 59327629  | 59327984  | Intergenic                          | Intergenic                          | 34825   | NR_036120 | 100422880 | NR_036120   |                    |                 |
| BLM6_peak_125 | chr16 | 3200543   | 3200887   | Intergenic                          | tRNA-Arg-CGG [tRNA] tRNA            | 15581   | NM_001134 | 7760      | Hs.115284   | NM_004220          | HPRD:12224      |
| BLM6_peak_169 | chr19 | 1021387   | 1021760   | promoter-TSS (NM_033420)            | promoter-TSS (NM_033420)            | 52      | NR_125730 | 103625684 | NR_125730   |                    |                 |
| BLM6_peak_343 | chr8  | 67026142  | 67026653  | Intergenic                          | Intergenic                          | -12881  | NM_184087 | 84675     | Hs.85524    | NM_033058          | HPRD:05927      |
| BLM6_peak_200 | chr5  | 1293444   | 1293570   | exon (NM_001193376, exon 2 of 2)    | exon (NM_001193376, exon 2 of 2)    | 905     | NM_198253 | 7015      | Hs.492203   | NM_198253          | HPRD:01754      |
| BLM6_peak_87  | chr12 | 96429674  | 96430022  | promoter-TSS (NM_000895)            | promoter-TSS (NM_000895)            | -409    | NM_000895 | 4048      | Hs.524648   | NM_000895          | HPRD:01056      |
| BLM6_peak_327 | chr6  | 126101246 | 126101597 | promoter-TSS (NM_00119961)          | promoter-TSS (NM_00119961)          | -886    | NM_001199 | 135112    | Hs.171426   | NM_181782          | HPRD:14814      |
| BLM6_peak_167 | chr17 | 80452427  | 80452817  | Intergenic                          | tRNA-Met-I [tRNA] tRNA              | -24972  | NM_004514 | 3607      | Hs.591140   | NM_004514          | HPRD:00982      |
| BLM6_peak_316 | chr6  | 28863826  | 28864225  | promoter-TSS (NR_104117)            | promoter-TSS (NR_104117)            | -282    | NR_104117 | 414760    | Hs.211005   | NR_104117          |                 |
| BLM6_peak_162 | chr17 | 37310596  | 37310953  | Intergenic                          | tRNA-Cys-TGY [tRNA] tRNA            | -2872   | NM_020405 | 57125     | Hs.125036   | NM_020405          | HPRD:08439      |
| BLM6_peak_273 | chr6  | 27618531  | 27618907  | Intergenic                          | tRNA-Val-GTY [tRNA] tRNA            | -43095  | NR_038293 | 100507173 | Hs.635987   | NR_038292          |                 |
| BLM6_peak_38  | chr1  | 161427796 | 161428109 | Intergenic                          | CpG                                 | -47253  | NM_021642 | 2212      | Hs.352642   | NM_021642          | HPRD:09096      |
| BLM6_peak_28  | chr1  | 161391717 | 161392094 | Intergenic                          | tRNA-Glu-GAA [tRNA] tRNA            | -54232  | NM_001013 | 257177    | Hs.534593   | NM_001013625       | HPRD:13257      |
| BLM6_peak_243 | chr6  | 27144842  | 27145195  | Intergenic                          | tRNA-Ile-ATT [tRNA] tRNA            | 29613   | NR_036096 | 100422934 | NR_036096   | miRBase:MI0014167  |                 |
| BLM6_peak_257 | chr6  | 27447331  | 27447673  | Intergenic                          | tRNA-Asp-GAY [tRNA] tRNA            | -6605   | NM_007149 | 7738      | Hs.158174   | NM_007149          | HPRD:03785      |
| BLM6_peak_291 | chr6  | 28564900  | 28565315  | Intergenic                          | Intergenic                          | -9995   | NM_052923 | 114821    | Hs.176980   | NM_052923          | HPRD:11720      |
| BLM6_peak_41  | chr1  | 161435140 | 161435262 | Intergenic                          | CpG                                 | -39872  | NM_021642 | 2212      | Hs.352642   | NM_021642          | HPRD:09096      |
| BLM6_peak_81  | chr11 | 66115466  | 66115813  | promoter-TSS (NM_006876)            | promoter-TSS (NM_006876)            | -478    | NM_006876 | 11041     | Hs.8526     | NM_006876          | HPRD:09270      |
| BLM6_peak_164 | chr17 | 66015866  | 66016206  | Intergenic                          | tRNA-Arg-AGG [tRNA] tRNA            | -15812  | NM_002266 | 3838      | Hs.594238   | NM_002266          | HPRD:02818      |
| BLM6_peak_287 | chr6  | 28442171  | 28442525  | Intergenic                          | tRNA-Thr-ACC [tRNA] tRNA            | -31069  | NM_001012 | 222696    | Hs.721841   | NM_001012455       | ENSG00000187987 |
| BLM6_peak_105 | chr14 | 21149724  | 21150071  | Intergenic                          | tRNA-Thr-ACA [tRNA] tRNA            | -2439   | NM_001145 | 283       | Hs.283749   | NM_001145          | HPRD:00105      |
| BLM6_peak_100 | chr14 | 21081335  | 21082122  | Intergenic                          | Intergenic                          | -22746  | NM_001024 | 493901    | Hs.729466   | NM_001024822       | HPRD:18667      |
| BLM6_peak_238 | chr6  | 26594968  | 26595336  | Intergenic                          | tRNA-Tyr-TAC [tRNA] tRNA            | -2019   | NM_013375 | 29777     | Hs.254406   | NM_013375          | HPRD:16469      |
| BLM6_peak_288 | chr6  | 28456629  | 28456959  | Intergenic                          | tRNA-Thr-CAG [tRNA] tRNA            | 26776   | NM_182701 | 257202    | Hs.448570   | NM_182701          | HPRD:12132      |
| BLM6_peak_5   | chr1  | 17004594  | 17004957  | Intergenic                          | tRNA-Gly-GGC [tRNA] tRNA            | -2975   | NR_037446 | 100500876 | NR_037446   | miRBase:MI0016076  |                 |
| BLM6_peak_232 | chr6  | 26555338  | 26555739  | Intergenic                          | tRNA-Pro-CYC [tRNA] tRNA            | 16943   | NM_006353 | 10473     | Hs.236774   | NM_006353          |                 |
| BLM6_peak_313 | chr6  | 28806095  | 28806429  | Intergenic                          | tRNA-Ala-GCY [tRNA] tRNA            | 25192   | NR_033379 | 401242    | Hs.448285   | NR_033379          | ENSG00000225595 |
| BLM6_peak_161 | chr17 | 37309822  | 37310174  | Intergenic                          | tRNA-Cys-TGY [tRNA] tRNA            | -2096   | NM_020405 | 57125     | Hs.125036   | NM_020405          | HPRD:08439      |
| BLM6_peak_111 | chr14 | 50329109  | 50329681  | Intergenic                          | 7S rRNA [srpRNA] srpRNA             | -9856   | NM_004713 | 9147      | Hs.655964   | NM_004713          | HPRD:08494      |
| BLM6_peak_60  | chr1  | 228761517 | 228761871 | Intergenic                          | CpG                                 | -18700  | NR_037962 | 58480     | Hs.647774   | NM_021205          | HPRD:06965      |
| BLM6_peak_52  | chr1  | 204475537 | 204475834 | Intergenic                          | Intergenic                          | -9565   | NM_001278 | 4194      | Hs.497492   | NM_001278          | HPRD:04082      |
| BLM6_peak_268 | chr6  | 27551099  | 27551418  | Intergenic                          | tRNA-Asp-GAY [tRNA] tRNA            | -110361 | NM_007149 | 7738      | Hs.158174   | NM_007149          | HPRD:03785      |
| BLM6_peak_120 | chr15 | 66161237  | 66161596  | promoter-TSS (NM_004663)            | promoter-TSS (NM_004663)            | -381    | NM_001206 | 8766      | Hs.321541   | NM_004663          | HPRD:05715      |
| BLM6_peak_51  | chr1  | 16784450  | 16784895  | Intergenic                          | tRNA-Pro-CYC [tRNA] tRNA            | -6437   | NR_024569 | 9018      | Hs.493910   | NM_030653          | HPRD:05086      |
| BLM6_peak_150 | chr17 | 8124030   | 8124394   | non-coding (NR_026951, exon 3 of 3) | non-coding (NR_026951, exon 3 of 3) | 3149    | NR_026951 | 284029    | Hs.121692   | NM_173621          | HPRD:08755      |
| BLM6_peak_240 | chr6  | 27064981  | 27065361  | Intergenic                          | Intergenic                          | 35404   | NM_021058 | 8970      | Hs.591807   | NM_021058          |                 |
| BLM6_peak_299 | chr6  | 28687361  | 28687761  | Intergenic                          | Intergenic                          | -132449 | NM_052923 | 114821    | Hs.176980   | NM_052923          | HPRD:11720      |
| BLM6_peak_48  | chr1  | 161582400 | 161582726 | Intergenic                          | tRNA-Gly-GCA [tRNA] tRNA            | 6714    | NR_024151 | 3311      | Hs.662180   | NR_024151          |                 |
| BLM6_peak_294 | chr6  | 28615805  | 28616165  | Intergenic                          | tRNA-Thr-ACC [tRNA] tRNA            | -60873  | NM_052923 | 114821    | Hs.176980   | NM_052923          | HPRD:11720      |
| BLM6_peak_103 | chr14 | 21099176  | 21099512  | Intergenic                          | tRNA-Thr-ACA [tRNA] tRNA            | 10506   | NM_001011 | 341799    | Hs.513132   | NM_001010968       | HPRD:17779      |
| BLM6_peak_89  | chr12 | 98897925  | 98898221  | promoter-TSS (NR_038383)            | promoter-TSS (NR_038383)            | -440    | NR_038383 | 643770    | Hs.129589   | NR_038383          | ENSG00000245017 |
| BLM6_peak_300 | chr6  | 28693692  | 28694002  | Intergenic                          | tRNA-Thr-AGY [tRNA] tRNA            | 137587  | NR_033379 | 401242    | Hs.448285   | NR_033379          | ENSG00000225595 |
| BLM6_peak_253 | chr6  | 27265665  | 27266040  | Intergenic                          | tRNA-Ser-AGY [tRNA] tRNA            | 14179   | NM_033482 | 94026     | Hs.729955   | NR_033482          | ENSG00000158553 |
| BLM6_peak_9   | chr1  | 17188303  | 17188673  | Intergenic                          | tRNA-Gly-GGC [tRNA] tRNA            | -2954   | NR_037446 | 100500876 | NR_037446   | miRBase:MI0016076  |                 |
| BLM6_peak_78  | chr11 | 59324743  | 59325183  | Intergenic                          | Intergenic                          | 37668   | NR_036120 | 100422880 | NR_036120   |                    |                 |
| BLM6_peak_209 | chr5  | 180596480 | 180596812 | Intergenic                          | tRNA-Val-GTY [tRNA] tRNA            | 14703   | NM_206880 | 285659    | Hs.553681   | NM_206880          | HPRD:14956      |
| BLM6_peak_163 | chr17 | 47269754  | 47270132  | Intergenic                          | CpG                                 | 16800   | NM_031498 | 2793      | Hs.181781   | NM_031498          | HPRD:06792      |
| BLM6_peak_226 | chr6  | 26331532  | 26331853  | Intergenic                          | tRNA-Trp-TGG [tRNA] tRNA            | -33695  | NM_001197 | 11118     | Hs.376046   | NM_007047          | HPRD:12547      |
| BLM6_peak_220 | chr6  | 26311835  | 26312165  | Intergenic                          | tRNA-Gln-CAA [tRNA] tRNA            | -26273  | NM_003543 | 8365      | Hs.591790   | NM_003543          | HPRD:11919      |
| BLM6_peak_93  | chr13 | 31247933  | 31248312  | Intergenic                          | tRNA-Asn-ACA [tRNA] tRNA            | -39493  | NM_001204 | 241       | Hs.507658   | NM_001629          | HPRD:04742      |
| BLM6_peak_320 | chr6  | 28918691  | 28919024  | Intergenic                          | tRNA-Lys-AAA [tRNA] tRNA            | 7296    | NR_103538 | 729583    | Hs.453549   | NR_103538          |                 |
| BLM6_peak_118 | chr15 | 45492445  | 45492786  | intron (NM_138356, intron 1 of 3)   | tRNA-His-CAY [tRNA] tRNA            | 758     | NM_138356 | 90525     | Hs.310399   | NM_138356          | HPRD:14272      |
| BLM6_peak_141 | chr16 | 70812762  | 70813120  | intron (NM_018052, intron 9 of 9)   | tRNA-Gly-GGY [tRNA] tRNA            | 22120   | NM_018052 | 55697     | Hs.445061   | NM_018052          | HPRD:07660      |
| BLM6_peak_20  | chr1  | 148598113 | 148598511 | intron (NR_104217, intron 2 of 2)   | intron (NR_104217, intron 2 of 2)   | 37465   | NM_173638 | 284565    | Hs.523572   | NM_173638          | HPRD:14710      |
| BLM6_peak_157 | chr17 | 36907906  | 36908227  | promoter-TSS (NM_002795)            | promoter-TSS (NM_002795)            | -900    | NR_104194 | 5691      | Hs.82793    | NM_002795          | HPRD:03709      |
| BLM6_peak_168 | chr19 | 893379    | 893391    |                                     |                                     |         |           |           |             |                    |                 |

|               |       |           |           |                                    |                                      |         |           |           |           |              |                   |
|---------------|-------|-----------|-----------|------------------------------------|--------------------------------------|---------|-----------|-----------|-----------|--------------|-------------------|
| BLM6_peak_309 | chr6  | 28770385  | 28770754  | Intergenic                         | Intergenic                           | 60885   | NR_033379 | 401242    | Hs.448285 | NR_033379    | ENSG00000225595   |
| BLM6_peak_315 | chr6  | 28849054  | 28849352  | Intergenic                         | tRNA-Arg-CGG tRNA tRNA               | -15104  | NR_104117 | 414760    | Hs.211005 | NR_104117    |                   |
| BLM6_peak_279 | chr6  | 27688758  | 27689087  | Intergenic                         | tRNA-Leu-TTA tRNA tRNA               | 27064   | NR_038292 | 100507173 | Hs.635987 | NR_038292    |                   |
| BLM6_peak_292 | chr6  | 28574853  | 28575138  | Intergenic                         | tRNA-Ala-GCY tRNA tRNA               | -19883  | NR_052923 | 114821    | Hs.176980 | NR_052923    | HPRD:11720        |
| BLM6_peak_258 | chr6  | 27463487  | 27463821  | Intergenic                         | tRNA-Ser-TCG tRNA tRNA               | -22757  | NR_007149 | 7738      | Hs.158174 | NR_007149    | HPRD:03785        |
| BLM6_peak_293 | chr6  | 28611123  | 28611440  | Intergenic                         | tRNA-Ala-GCG tRNA tRNA               | -56169  | NR_052923 | 114821    | Hs.176980 | NR_052923    | HPRD:11720        |
| BLM6_peak_110 | chr14 | 50053159  | 50053733  | promoter-TSS (NM_001032)           | promoter-TSS (NM_001032)             | -312    | NR_001030 | 6235      | Hs.156367 | NR_001032    | HPRD:04698        |
| BLM6_peak_322 | chr6  | 28949315  | 28949595  | Intergenic                         | tRNA-Phe-TTY tRNA tRNA               | 23582   | NR_001010 | 282890    | Hs.148218 | NR_001010    | HPRD:18325        |
| BLM6_peak_241 | chr6  | 27125814  | 27126176  | Intergenic                         | Intergenic                           | 10590   | NR_036096 | 100422934 |           | NR_036096    | miRBase:MI0014167 |
| BLM6_peak_109 | chr14 | 32672247  | 32672541  | promoter-TSS (NR_125730).4         | promoter-TSS (NR_125730).4           | 81      | NR_125730 | 103625684 |           | NR_125730    |                   |
| BLM6_peak_113 | chr14 | 73429569  | 73429890  | Intergenic                         | tRNA-Cys-TGY tRNA tRNA               | 23935   | NR_178441 | 53349     | Hs.335106 | NR_011260    | HPRD:12017        |
| BLM6_peak_276 | chr6  | 27640050  | 27640430  | Intergenic                         | tRNA-Ser-TCG tRNA tRNA               | -21574  | NR_038293 | 100507173 | Hs.635987 | NR_038292    |                   |
| BLM6_peak_124 | chr16 | 686602    | 686932    | promoter-TSS (NM_032366)           | promoter-TSS (NM_032366)             | -401    | NR_109979 | 84326     | Hs.239500 | NR_032366    | HPRD:17482        |
| BLM6_peak_302 | chr6  | 28703049  | 28703379  | Intergenic                         | tRNA-Ala-GCY tRNA tRNA               | 128240  | NR_033379 | 401242    | Hs.448285 | NR_033379    | ENSG00000225595   |
| BLM6_peak_154 | chr17 | 8129428   | 8130484   | non-coding (NR_046431, exon 22)    | non-coding (NR_046431, exon 22)      | -2595   | NR_026951 | 284029    | Hs.121692 | NR_173621    | HPRD:08755        |
| BLM6_peak_259 | chr6  | 27470761  | 27471054  | Intergenic                         | Intergenic                           | -30010  | NR_007149 | 7738      | Hs.158174 | NR_007149    | HPRD:03785        |
| BLM6_peak_176 | chr19 | 45981710  | 45982050  | Intergenic                         | tRNA-Ser-C tRNA tRNA                 | 10627   | NR_006732 | 2354      | Hs.590858 | NR_006732    | HPRD:01270        |
| BLM6_peak_159 | chr17 | 37023785  | 37024080  | Intergenic                         | tRNA-Cys-TGY tRNA tRNA               | -2180   | NR_073384 | 3927      | Hs.741156 | NR_006148    | HPRD:04229        |
| BLM6_peak_239 | chr6  | 27059407  | 27059740  | Intergenic                         | tRNA-Pro-CCG tRNA tRNA               | 41002   | NR_021058 | 8970      | Hs.591807 | NR_021058    |                   |
| BLM6_peak_304 | chr6  | 28715415  | 28715724  | Intergenic                         | tRNA-Lys-AAA tRNA tRNA               | 115885  | NR_033379 | 401242    | Hs.448285 | NR_033379    | ENSG00000225595   |
| BLM6_peak_18  | chr1  | 14782590  | 14782593  | intron (NR_102404, intron 17)      | tRNA-Gln-CAG tRNA tRNA               | -19082  | NR_049810 | 100847044 |           | NR_049810    |                   |
| BLM6_peak_181 | chr2  | 43037529  | 43037876  | Intergenic                         | tRNA-Ile-ATA tRNA tRNA               | -17951  | NR_012205 | 23498     | Hs.368805 | NR_012205    | HPRD:05158        |
| BLM6_peak_310 | chr6  | 28775495  | 28775792  | Intergenic                         | tRNA-Phe-TTY tRNA tRNA               | 55811   | NR_033379 | 401242    | Hs.448285 | NR_033379    | ENSG00000225595   |
| BLM6_peak_311 | chr6  | 28779742  | 28780021  | Intergenic                         | tRNA-Ala-GCY tRNA tRNA               | 51573   | NR_033379 | 401242    | Hs.448285 | NR_033379    | ENSG00000225595   |
| BLM6_peak_155 | chr17 | 19411363  | 19411704  | Intergenic                         | tRNA-Trp-TGG tRNA tRNA               | -25634  | NR_018242 | 55244     | Hs.232054 | NR_018242    | HPRD:07703        |
| BLM6_peak_94  | chr13 | 41634752  | 41635031  | promoter-TSS (NM_007187)           | promoter-TSS (NM_007187)             | -806    | NR_007187 | 11193     | Hs.411300 | NR_007187    | HPRD:16086        |
| BLM6_peak_324 | chr6  | 52860367  | 52860847  | promoter-TSS (NM_001512)           | promoter-TSS (NM_001512)             | -429    | NR_001512 | 2941      | Hs.485557 | NR_001512    | HPRD:06899        |
| BLM6_peak_133 | chr16 | 3239531   | 3239829   | Intergenic                         | tRNA-Pro-CYC tRNA tRNA               | -14567  | NR_012360 | 4992      | Hs.664502 | NR_012360    | HPRD:09125        |
| BLM6_peak_269 | chr6  | 27559480  | 27559797  | Intergenic                         | tRNA-Lys-AAA tRNA tRNA               | -102176 | NR_038293 | 100507173 | Hs.635987 | NR_038292    |                   |
| BLM6_peak_21  | chr1  | 148760184 | 148760506 | intron (NR_104217, intron 2 of 17) | intron (NR_104217, intron 2 of 17)   | -45670  | NR_001144 | 730262    |           | NR_001144032 |                   |
| BLM6_peak_121 | chr15 | 68132148  | 68132467  | promoter-TSS (NR_125730).5         | promoter-TSS (NR_125730).5           | 76      | NR_125730 | 103625684 |           | NR_125730    |                   |
| BLM6_peak_130 | chr16 | 3225533   | 3225889   | Intergenic                         | tRNA-Lys-AAG tRNA tRNA               | -28536  | NR_012360 | 4992      | Hs.664502 | NR_012360    | HPRD:09125        |
| BLM6_peak_191 | chr21 | 18826922  | 18827287  | Intergenic                         | tRNA-Gly-GVY tRNA tRNA               | 15896   | NR_037855 | 100505929 | Hs.46707  | NR_00105521  | ENSG00000232560   |
| BLM6_peak_8   | chr1  | 17386598  | 17386896  | Intergenic                         | tRNA-Val-GTG tRNA tRNA               | -1231   | NR_037446 | 100500876 |           | NR_037446    | miRBase:MI0016076 |
| BLM6_peak_132 | chr16 | 3233949   | 3234137   | Intergenic                         | tRNA-Pro-CCA tRNA tRNA               | -20114  | NR_012360 | 4992      | Hs.664502 | NR_012360    | HPRD:09125        |
| BLM6_peak_263 | chr6  | 27509386  | 27509721  | Intergenic                         | Intergenic                           | -68656  | NR_007149 | 7738      | Hs.158174 | NR_007149    | HPRD:03785        |
| BLM6_peak_306 | chr6  | 28757404  | 28757690  | Intergenic                         | tRNA-Ala-GCA tRNA tRNA               | 73907   | NR_033379 | 401242    | Hs.448285 | NR_033379    | ENSG00000225595   |
| BLM6_peak_3   | chr1  | 16661680  | 16661920  | Intergenic                         | CpG                                  | -13609  | NR_037446 | 100500876 |           | NR_037446    | miRBase:MI0016076 |
| BLM6_peak_333 | chr7  | 148638512 | 148638765 | Intergenic                         | HY5 scRNA scRNA                      | -57197  | NR_001203 | 2146      | Hs.444082 | NR_004456    | HPRD:03342        |
| BLM6_peak_26  | chr1  | 159111273 | 159111549 | Intergenic                         | tRNA-Arg-AGA tRNA tRNA               | -29966  | NR_021189 | 57863     | Hs.365689 | NR_021189    | HPRD:13733        |
| BLM6_peak_22  | chr1  | 149294508 | 149294806 | Intergenic                         | Intergenic                           | 7206    | NR_111934 | 644634    | Hs.723057 | NR_111934    |                   |
| BLM6_peak_305 | chr6  | 28725994  | 28726312  | Intergenic                         | tRNA-Ala-GCA tRNA tRNA               | 105301  | NR_033379 | 401242    | Hs.448285 | NR_033379    | ENSG00000225595   |
| BLM6_peak_129 | chr16 | 3221965   | 3222262   | Intergenic                         | tRNA-Pro-CCG tRNA tRNA               | -32134  | NR_012360 | 4992      | Hs.664502 | NR_012360    | HPRD:09125        |
| BLM6_peak_86  | chr12 | 56584065  | 56584307  | promoter-TSS (NM_003075)           | promoter-TSS (NM_003075)             | -835    | NR_003075 | 6601      | Hs.236030 | NR_003075    | HPRD:03437        |
| BLM6_peak_172 | chr19 | 18392447  | 18392728  | promoter-TSS (NR_036155)           | promoter-TSS (NR_036155)             | -121    | NR_001286 | 3727      | Hs.2780   | NR_005354    | HPRD:01304        |
| BLM6_peak_360 | chrX  | 18692889  | 18693202  | Intergenic                         | tRNA-Val-GTA tRNA tRNA               | -2822   | NR_000330 | 6247      | Hs.715725 | NR_000330    | HPRD:02426        |
| BLM6_peak_334 | chr7  | 148660336 | 148660592 | Intergenic                         | HY4 scRNA scRNA                      | 65318   | NR_004911 | 9601      | Hs.93659  | NR_004911    | HPRD:05921        |
| BLM6_peak_115 | chr15 | 26327244  | 26327539  | Intergenic                         | tRNA-Glu-GAG tRNA tRNA               | -33569  | NR_038851 | 503519    | Hs.371380 | NR_038851    | ENSG00000259150   |
| BLM6_peak_61  | chr1  | 228763803 | 228764094 | Intergenic                         | CpG                                  | -16446  | NR_037962 | 58480     | Hs.647774 | NR_021205    | HPRD:06965        |
| BLM6_peak_139 | chr16 | 22309708  | 22310007  | intron (NM_001258035, intron 1)    | MIR SINE MIR                         | 1161    | NR_001258 | 55718     | Hs.460298 | NR_018119    | HPRD:15155        |
| BLM6_peak_264 | chr6  | 27513394  | 27513661  | Intergenic                         | tRNA-Ser-TCA tRNA tRNA               | -72630  | NR_007149 | 7738      | Hs.158174 | NR_007149    | HPRD:03785        |
| BLM6_peak_206 | chr5  | 180523970 | 180524271 | Intergenic                         | tRNA-Val-GTY tRNA tRNA               | 28184   | NR_001258 | 26693     | Hs.742585 | NR_001258283 | ENSG00000185372   |
| BLM6_peak_208 | chr5  | 180591088 | 180591399 | Intergenic                         | Intergenic                           | 9300    | NR_206880 | 285659    | Hs.553681 | NR_206880    | HPRD:14956        |
| BLM6_peak_307 | chr6  | 28758388  | 28758633  | Intergenic                         | tRNA-Phe-TTY tRNA tRNA               | 72934   | NR_033379 | 401242    | Hs.448285 | NR_033379    | ENSG00000225595   |
| BLM6_peak_158 | chr17 | 37017782  | 37018081  | Intergenic                         | Intergenic                           | -7878   | NR_009978 | 9349      | Hs.406100 | NR_000978    |                   |
| BLM6_peak_335 | chr7  | 148680766 | 148681031 | Intergenic                         | HY3 scRNA scRNA                      | 44884   | NR_004911 | 9601      | Hs.93659  | NR_004911    | HPRD:06501        |
| BLM6_peak_245 | chr6  | 27182880  | 27183122  | Intergenic                         | tRNA-Arg-GCY tRNA tRNA               | -32501  | NR_005865 | 10279     | Hs.274407 | NR_005865    | HPRD:06205        |
| BLM6_peak_298 | chr6  | 28678277  | 28678575  | Intergenic                         | tRNA-Ala-GCY tRNA tRNA               | -123314 | NR_052923 | 114821    | Hs.176980 | NR_052923    | HPRD:11720        |
| BLM6_peak_75  | chr11 | 35547974  | 35548321  | promoter-TSS (NM_015430)           | promoter-TSS (NM_015430)             | -568    | NR_001282 | 25891     | Hs.55044  | NR_015430    | HPRD:07104        |
| BLM6_peak_201 | chr5  | 135416081 | 135416325 | promoter-TSS (NR_030583)           | promoter-TSS (NR_030583)             | 83      | NR_030583 | 100126299 |           | NR_030583    | ENSG00000270123   |
| BLM6_peak_179 | chr19 | 50620877  | 50621175  | promoter-TSS (NR_024228).3         | promoter-TSS (NR_024228).3           | 71      | NR_024223 | 100169952 | Hs.723094 | NR_024223    |                   |
| BLM6_peak_272 | chr6  | 27586071  | 27586313  | Intergenic                         | tRNA-Thr-ACA tRNA tRNA               | -75622  | NR_038293 | 100507173 | Hs.635987 | NR_038292    |                   |
| BLM6_peak_184 | chr2  | 101368373 | 101368743 | Intergenic                         | AluSg7 SINE Alu                      | -68055  | NR_002518 | 4862      | Hs.156832 | NR_002518    | HPRD:09137        |
| BLM6_peak_312 | chr6  | 28784925  | 28785178  | Intergenic                         | tRNA-Ala-GCA tRNA tRNA               | 46403   | NR_033379 | 401242    | Hs.448285 | NR_033379    | ENSG00000225595   |
| BLM6_peak_74  | chr11 | 5246194   | 5247150   | TTS (NM_000518)                    | TTS (NM_000518)                      | 1629    | NR_000518 | 3043      | Hs.523443 | NR_000518    | HPRD:00786        |
| BLM6_peak_23  | chr1  | 149298428 | 149298631 | Intergenic                         | [CAAAA]n Simple_repeat Simple_repeat | 11093   | NR_111934 | 644634    | Hs.723057 | NR_111934    |                   |
| BLM6_peak_30  | chr1  | 161409865 | 161410076 | Intergenic                         | tRNA-Gly-GAG tRNA tRNA               | -65235  | NR_021642 | 2212      | Hs.352642 | NR_021642    | HPRD:00906        |
| BLM6_peak_134 | chr16 | 3241442   | 3241760   | Intergenic                         | tRNA-Lys-AAG tRNA tRNA               | -12691  | NR_012360 | 4992      | Hs.664502 | NR_012360    | HPRD:09125        |
| BLM6_peak_210 | chr5  | 180600563 | 180600805 | Intergenic                         | tRNA-Val-GTY tRNA tRNA               | 18224   | NR_108031 | 102577426 | Hs.277359 | NR_108031    |                   |
| BLM6_peak_244 | chr6  | 27181536  | 27181739  | Intergenic                         | tRNA-Arg-GCY tRNA tRNA               | -33865  | NR_005865 | 10279     | Hs.274407 | NR_005865    | HPRD:06205        |
| BLM6_peak_24  | chr1  | 149680112 | 149680348 | Intergenic                         | tRNA-Gly-GGG tRNA tRNA               | -74020  | NR_000566 | 2209      | Hs.77424  | NR_000566    | HPRD:00904        |
| BLM6_peak_97  | chr14 | 20811246  | 20811550  | promoter-TSS (NM_005484)           | promoter-TSS (NM_005484)             | 172     | NR_002312 | 85495     | Hs.613102 | NR_002312    | ENSG00000259001   |
| BLM6_peak_207 | chr5  | 180529152 | 180529384 | Intergenic                         | tRNA-Val-GTY tRNA tRNA               | 23036   | NR_001258 | 26693     | Hs.742585 | NR_001258283 | ENSG00000185372   |
| BLM6_peak_338 | chr8  | 17352524  | 17352774  | Intergenic                         | Intergenic                           | -1948   | NR_001008 | 6542      | Hs.448520 | NR_003046    | HPRD:03524        |
| BLM6_peak_222 | chr6  | 26319236  | 26319460  | Intergenic                         | tRNA-Trp-TGG tRNA tRNA               | -33621  | NR_003543 | 8365      | Hs.591790 | NR_003543    | HPRD:11919        |
| BLM6_peak_346 | chr9  | 14433863  | 14434071  | Intergenic                         | tRNA-His-CAY tRNA tRNA               | -34985  | NR_001190 | 4781      | Hs.644095 | NR_005096    | HPRD:09008        |
| BLM6_peak_297 | chr6  | 28663603  | 28663867  | Intergenic                         | tRNA-Ala-GCY tRNA tRNA               | -108623 | NR_052923 | 114821    | Hs.176980 | NR_052923    | HPRD:11720        |
| BLM6_peak_247 | chr6  | 27203203  | 27203453  | Intergenic                         | tRNA-Val-GTY tRNA tRNA               | -12174  | NR_005865 | 10279     | Hs.274407 | NR_005865    | HPRD:06205        |
| BLM6_peak_187 | chr20 | 6727607   | 6727803   | Intergenic                         | MIR SINE MIR                         | -21040  | NR_001200 | 650       | Hs.73853  | NR_001200    | HPRD:02026        |
| BLM6_peak_182 | chr2  | 47562452  | 47562643  | intron (NR_110208, intron 1 of 2)  | BC200 scRNA scRNA                    | 9666    | NR_110207 | 101927043 | Hs.515976 | NR_110207    | ENSG00000234690   |
| BLM6_peak_205 | chr5  | 173193644 | 173194114 | Intergenic                         | AluY SINE Alu                        | -20667  | NR_108027 | 101928136 | Hs.449267 | NR_108027    |                   |
| BLM6_peak_337 | chr7  | 149388200 | 149388407 | Intergenic                         | tRNA-Cys-TGY tRNA tRNA               | -23799  | NR_032534 | 8426      | Hs.299560 | NR_032534    | HPRD:11167        |
| BLM6_peak_135 | chr16 | 3241960   | 3242158   | Intergenic                         | tRNA-Pro-CYC tRNA tRNA               | -12188  | NR_012360 | 4992      | Hs.664502 | NR_012360    | HPRD:09           |

| PeakID       | Chr   | Start     | End       | Annotation                      | Detailed Annotation         | Distance to | Nearest PromoterID | Entrez ID | Nearest Unigene | Nearest Refseq | Nearest Ensembl   |
|--------------|-------|-----------|-----------|---------------------------------|-----------------------------|-------------|--------------------|-----------|-----------------|----------------|-------------------|
| LOX peak 64  | chr1  | 228781607 | 228782055 | intron (NR_037962, intron 1)    | CpG-2319                    | 1174        | NR_002834          | 574029    | Hs.647777       | NR_002834      |                   |
| LOX peak 50  | chr1  | 228750323 | 228750762 | Intergenic                      | CpG                         | -29852      | NR_037962          | 58480     | Hs.647774       | NM_021205      | HPRD:06965        |
| LOX peak 55  | chr1  | 228761465 | 228761899 | Intergenic                      | CpG                         | -18712      | NR_037962          | 58480     | Hs.647774       | NM_021205      | HPRD:06965        |
| LOX peak 54  | chr1  | 228759212 | 228759633 | Intergenic                      | CpG                         | -20972      | NR_037962          | 58480     | Hs.647774       | NM_021205      | HPRD:06965        |
| LOX peak 30  | chr1  | 161424198 | 161424843 | Intergenic                      | CpG                         | -50685      | NM_021642          | 2212      | Hs.352642       | NM_021642      | HPRD:00906        |
| LOX peak 60  | chr1  | 228772670 | 228773091 | Intergenic                      | CpG                         | -7514       | NR_037962          | 58480     | Hs.647774       | NM_021205      | HPRD:06965        |
| LOX peak 129 | chr16 | 22206854  | 22207250  | Intergenic                      | tRNA-Leu-CTA [tRNA] tRNA    | -10540      | NM_013302          | 29904     | Hs.498892       | NM_013302      |                   |
| LOX peak 58  | chr1  | 228768207 | 228768723 | Intergenic                      | CpG                         | -11929      | NR_037962          | 58480     | Hs.647774       | NM_021205      | HPRD:06965        |
| LOX peak 48  | chr1  | 228745857 | 228746265 | Intergenic                      | CpG                         | -34333      | NR_037962          | 58480     | Hs.647774       | NM_021205      | HPRD:06965        |
| LOX peak 51  | chr1  | 228752570 | 228752956 | Intergenic                      | CpG                         | -27631      | NR_037962          | 58480     | Hs.647774       | NM_021205      | HPRD:06965        |
| LOX peak 33  | chr1  | 161431613 | 161432244 | Intergenic                      | CpG                         | -43277      | NM_021642          | 2212      | Hs.352642       | NM_021642      | HPRD:00906        |
| LOX peak 181 | chr2  | 27273518  | 27274310  | promoter-TSS (NM_021831)        | promoter-TSS (NM_021831)    | -577        | NM_021831          | 60509     | Hs.138207       | NM_021831      | HPRD:07968        |
| LOX peak 65  | chr1  | 249167939 | 249168718 | Intergenic                      | Intergenic                  | -15013      | NM_001193328       | 55657     | Hs.377705       | NM_017865      | HPRD:07922        |
| LOX peak 117 | chr15 | 89878161  | 89878571  | promoter-TSS (NM_0011261)       | promoter-TSS (NM_001126131) | -340        | NM_002693          | 5428      | Hs.706688       | NM_002693      | HPRD:01438        |
| LOX peak 29  | chr1  | 161420295 | 161420773 | Intergenic                      | CpG                         | -54671      | NM_021642          | 2212      | Hs.352642       | NM_021642      | HPRD:00906        |
| LOX peak 59  | chr1  | 228770466 | 228770897 | Intergenic                      | CpG                         | -9713       | NR_037962          | 58480     | Hs.647774       | NM_021205      | HPRD:06965        |
| LOX peak 198 | chr5  | 140105609 | 140106066 | promoter-TSS (NR_026705)        | promoter-TSS (NR_026705)    | 93          | NR_026705          | 56662     |                 | NR_026705      | ENSG00000202515   |
| LOX peak 8   | chr1  | 145399042 | 145399475 | intron (NM_001039703, intron 1) | tRNA-Glu-GAG [tRNA] tRNA    | -13933      | NM_213653          | 148738    | Hs.632436       | NM_145277      | HPRD:10521        |
| LOX peak 36  | chr1  | 161439634 | 161439634 | Intergenic                      | CpG                         | -35905      | NM_021642          | 2212      | Hs.352642       | NM_021642      | HPRD:10521        |
| LOX peak 63  | chr1  | 228779374 | 228779849 | promoter-TSS (NR_037962)        | promoter-TSS (NR_037962)    | -783        | NR_037962          | 58480     | Hs.647774       | NM_021205      | HPRD:06965        |
| LOX peak 5   | chr1  | 145395327 | 145395747 | intron (NM_001039703, intron 1) | tRNA-Lys-AAG [tRNA] tRNA    | -17654      | NM_213653          | 148738    | Hs.632436       | NM_145277      | HPRD:10521        |
| LOX peak 109 | chr15 | 40885845  | 40886242  | promoter-TSS (NM_144508)        | promoter-TSS (NM_144508)    | -404        | NM_170589          | 57082     | Hs.181855       | NM_144508      | HPRD:10634        |
| LOX peak 53  | chr1  | 228757023 | 228757420 | Intergenic                      | CpG                         | -23173      | NR_037962          | 58480     | Hs.647774       | NM_021205      | HPRD:06965        |
| LOX peak 46  | chr1  | 204475518 | 204476364 | Intergenic                      | Intergenic                  | -9566       | NM_001278518       | 4194      | Hs.497492       | NM_002393      | HPRD:04082        |
| LOX peak 52  | chr1  | 228754816 | 228755255 | Intergenic                      | CpG                         | -25359      | NR_037962          | 58480     | Hs.647774       | NM_021205      | HPRD:06965        |
| LOX peak 7   | chr1  | 145397692 | 145398071 | intron (NM_001039703, intron 1) | tRNA-Gly-GGA [tRNA] tRNA    | -15310      | NM_213653          | 148738    | Hs.632436       | NM_145277      | HPRD:10521        |
| LOX peak 26  | chr1  | 161414614 | 161417460 | Intergenic                      | CpG                         | -85068      | NM_021642          | 2212      | Hs.352642       | NM_021642      | HPRD:00906        |
| LOX peak 111 | chr15 | 45492811  | 45492811  | intron (NM_138356, intron 1)    | tRNA-His-CAY [tRNA] tRNA    | 760         | NM_138356          | 90525     | Hs.310399       | NM_138356      | HPRD:14272        |
| LOX peak 84  | chr12 | 125411720 | 125412606 | Intergenic                      | Intergenic                  | 12065       | NR_049820          | 100847004 |                 | NR_049820      | miRBase:MI0018167 |
| LOX peak 210 | chr5  | 180634613 | 180635040 | Intergenic                      | tRNA-Lys-AAG [tRNA] tRNA    | -2533       | NM_203293          | 81786     | Hs.487412       | NM_033342      | HPRD:11648        |
| LOX peak 169 | chr19 | 50595574  | 50595998  | promoter-TSS (NR_024214)        | promoter-TSS (NR_024214.2)  | 80          | NR_024225          | 100169954 | Hs.723094       | NR_024225      |                   |
| LOX peak 139 | chr17 | 8089550   | 8091131   | promoter-TSS (NR_039746)        | promoter-TSS (NR_039746)    | 77          | NR_039746          | 100616406 |                 | NR_039746      |                   |
| LOX peak 61  | chr1  | 228774935 | 228775343 | Intergenic                      | CpG                         | -5255       | NR_037962          | 58480     | Hs.647774       | NM_021205      | HPRD:06965        |
| LOX peak 57  | chr1  | 228765967 | 228766348 | Intergenic                      | CpG                         | -14237      | NR_037962          | 58480     | Hs.647774       | NM_021205      | HPRD:06965        |
| LOX peak 176 | chr19 | 50626230  | 50626567  | promoter-TSS (NR_024228)        | promoter-TSS (NR_024228).2  | 53          | NR_024225          | 100169954 | Hs.723094       | NR_024225      |                   |
| LOX peak 62  | chr1  | 228777206 | 228777558 | Intergenic                      | CpG                         | -3012       | NR_037962          | 58480     | Hs.647774       | NM_021205      | HPRD:06965        |
| LOX peak 32  | chr1  | 161427576 | 161428137 | Intergenic                      | CpG                         | -47259      | NM_021642          | 2212      | Hs.352642       | NM_021642      | HPRD:00906        |
| LOX peak 128 | chr16 | 14379630  | 14380004  | Intergenic                      | tRNA-Thr-ACG [tRNA] tRNA    | -18007      | NR_030177          | 574455    |                 | NR_030177      | miRBase:MI0003137 |
| LOX peak 6   | chr1  | 145396687 | 145397113 | intron (NM_001039703, intron 1) | tRNA-His-CAY [tRNA] tRNA    | -16291      | NM_213653          | 148738    | Hs.632436       | NM_145277      | HPRD:10521        |
| LOX peak 209 | chr5  | 180633730 | 180634162 | Intergenic                      | Intergenic                  | -1653       | NM_203293          | 81786     | Hs.487412       | NM_033342      | HPRD:11648        |
| LOX peak 38  | chr1  | 161494351 | 161493857 | promoter-TSS (NM_002155)        | promoter-TSS (NM_002155)    | -382        | NM_002155          | 3310      | Hs.654614       | NM_002155      | HPRD:00775        |
| LOX peak 150 | chr17 | 37310555  | 37310949  | Intergenic                      | tRNA-Cys-TGY [tRNA] tRNA    | -2850       | NM_020405          | 57125     | Hs.125036       | NM_020405      | HPRD:08439        |
| LOX peak 49  | chr1  | 228748078 | 228748514 | Intergenic                      | CpG                         | -32098      | NR_037962          | 58480     | Hs.647774       | NM_021205      | HPRD:06965        |
| LOX peak 17  | chr1  | 149680022 | 149680415 | Intergenic                      | tRNA-Gly-GGG [tRNA] tRNA    | -74032      | NM_000566          | 2209      | Hs.77424        | NM_000566      | HPRD:09094        |
| LOX peak 19  | chr1  | 153643584 | 153643957 | promoter-TSS (NM_004515)        | promoter-TSS (NM_004515)    | -266        | NM_004515          | 3608      | Hs.75117        | NM_004515      | HPRD:04419        |
| LOX peak 164 | chr19 | 48421545  | 48421909  | promoter-TSS (NR_004436)        | promoter-TSS (NR_004436)    | 41          | NR_004435          | 100126798 | Hs.579631       | NR_004435      |                   |
| LOX peak 132 | chr16 | 57333731  | 57334611  | Intergenic                      | Alu[B] [SINE] Alu           | -15587      | NM_015993          | 51090     | Hs.632215       | NM_015993      | HPRD:11854        |
| LOX peak 183 | chr2  | 70479552  | 70476327  | promoter-TSS (NM_022037)        | promoter-TSS (NM_022037)    | -360        | NM_022173          | 7072      | Hs.413123       | NM_022037      | HPRD:04626        |
| LOX peak 145 | chr17 | 29876964  | 29877381  | Intergenic                      | Intergenic                  | -9843       | NR_029710          | 406968    |                 | NR_029710      | miRBase:MI0000487 |
| LOX peak 196 | chr5  | 140090734 | 140091128 | promoter-TSS (NR_026703)        | promoter-TSS (NR_026703)    | 70          | NR_026703          | 56664     |                 | NR_026703      | ENSG00000199990   |
| LOX peak 130 | chr16 | 22308322  | 22308677  | promoter-TSS (NM_001258034)     | promoter-TSS (NM_001258034) | -197        | NM_018119          | 55718     | Hs.460298       | NM_018119      | HPRD:15155        |
| LOX peak 41  | chr1  | 161508980 | 161510273 | Intergenic                      | tRNA-Asn-AAC [tRNA] tRNA    | 9737        | NM_001127592       | 2214      | Hs.372679       | NM_000569      | HPRD:00903        |
| LOX peak 25  | chr1  | 161413004 | 161413334 | Intergenic                      | CpG                         | -62036      | NM_021642          | 2212      | Hs.352642       | NM_021642      | HPRD:00906        |
| LOX peak 73  | chr11 | 5933548   | 59334074  | Intergenic                      | Intergenic                  | 28820       | NR_036120          | 100422880 |                 | NR_036120      |                   |
| LOX peak 22  | chr1  | 161397695 | 161398042 | Intergenic                      | tRNA-Asn-AAC [tRNA] tRNA    | -60195      | NM_001013625       | 257177    | Hs.534593       | NM_001013625   | HPRD:13257        |
| LOX peak 20  | chr1  | 161369330 | 161369707 | Intergenic                      | CpG                         | -31845      | NM_001013625       | 257177    | Hs.534593       | NM_001013625   | HPRD:13257        |
| LOX peak 175 | chr19 | 50620830  | 50621213  | promoter-TSS (NR_024228)        | promoter-TSS (NR_024228).3  | 76          | NR_024223          | 100169952 | Hs.723094       | NR_024223      |                   |
| LOX peak 67  | chr10 | 69524123  | 69524507  | Intergenic                      | tRNA-Ser-TCA [tRNA] tRNA    | -68366      | NM_013266          | 29119     | Hs.21375        | NM_013266      | HPRD:09639        |
| LOX peak 35  | chr1  | 161435125 | 161435550 | Intergenic                      | CpG                         | -39688      | NM_021642          | 2212      | Hs.352642       | NM_021642      | HPRD:00906        |
| LOX peak 83  | chr12 | 125406120 | 125406496 | Intergenic                      | tRNA-Ala-GCG [tRNA] tRNA    | 6215        | NR_049820          | 100847004 |                 | NR_049820      | miRBase:MI0018167 |
| LOX peak 15  | chr1  | 149254020 | 149294847 | Intergenic                      | tRNA-Gly-GGG [tRNA] tRNA    | 7223        | NR_111934          | 644634    | Hs.723057       | NR_111934      |                   |
| LOX peak 108 | chr15 | 26327211  | 26327599  | Intergenic                      | tRNA-Gly-GAG [tRNA] tRNA    | -33555      | NR_038851          | 503519    | Hs.371380       | NR_038851      | ENSG00000259150   |
| LOX peak 77  | chr11 | 75946393  | 75947098  | Intergenic                      | CpG                         | -29171      | NM_004626          | 7481      | Hs.108219       | NM_004626      | HPRD:04741        |
| LOX peak 170 | chr19 | 50600991  | 50601333  | promoter-TSS (NR_024214)        | promoter-TSS (NR_024214)    | 41          | NR_024225          | 100169954 | Hs.723094       | NR_024225      |                   |
| LOX peak 174 | chr19 | 50615485  | 50615850  | promoter-TSS (NR_024228)        | promoter-TSS (NR_024228).4  | 78          | NR_024226          | 100169955 | Hs.723094       | NR_024226      |                   |
| LOX peak 155 | chr17 | 80452407  | 80452823  | Intergenic                      | tRNA-Met-i [tRNA] tRNA      | -24979      | NM_004514          | 3607      | Hs.591140       | NM_004514      | HPRD:00982        |
| LOX peak 135 | chr17 | 8022954   | 8023832   | TTS (NM_032580)                 | TTS (NM_032580)             | -1159       | NM_001165960       | 59344     | Hs.232770       | NM_001165960   | HPRD:06231        |
| LOX peak 110 | chr15 | 45490985  | 45490985  | intron (NM_138356, intron 2)    | tRNA-His-CAY [tRNA] tRNA    | 2562        | NM_138356          | 90525     | Hs.310399       | NM_138356      | HPRD:14272        |
| LOX peak 112 | chr15 | 45493212  | 45493596  | promoter-TSS (NM_138356)        | promoter-TSS (NM_138356)    | -31         | NM_138356          | 90525     | Hs.310399       | NM_138356      | HPRD:14272        |
| LOX peak 85  | chr12 | 125424002 | 125424733 | Intergenic                      | Intergenic                  | 24274       | NR_049820          | 100847004 |                 | NR_049820      | miRBase:MI0018167 |
| LOX peak 197 | chr5  | 140098379 | 140098748 | promoter-TSS (NR_026704)        | promoter-TSS (NR_026704)    | 52          | NR_026704          | 56663     |                 | NR_026704      | ENSG00000202111   |
| LOX peak 105 | chr14 | 58706464  | 58706802  | Intergenic                      | tRNA-Lys-AAG [tRNA] tRNA    | -4890       | NM_002788          | 5684      | Hs.558799       | NM_002788      | HPRD:01463        |
| LOX peak 227 | chr16 | 26554202  | 26554572  | Intergenic                      | tRNA-Ile-ATT [tRNA] tRNA    | 15815       | NM_006353          | 10473     | Hs.236774       | NM_006353      |                   |
| LOX peak 120 | chr16 | 3202775   | 3203231   | Intergenic                      | Intergenic                  | 17869       | NM_001134655       | 7760      | Hs.115284       | NM_004220      | HPRD:12224        |
| LOX peak 138 | chr17 | 8042008   | 8042952   | Intergenic                      | Intergenic                  | 5909        | NR_106943          | 102465532 |                 | NR_106943      |                   |
| LOX peak 190 | chr3  | 45730334  | 45730652  | promoter-TSS (NM_014016)        | promoter-TSS (NM_014016)    | -119        | NR_033947          | 644714    | Hs.712889       | NR_033947      |                   |
| LOX peak 40  | chr1  | 161500746 | 161501163 | Intergenic                      | tRNA-Gly-GGA [tRNA] tRNA    | 6918        | NM_002155          | 3310      |                 |                |                   |

|              |       |           |           |                                    |                                     |         |              |           |           |              |                   |
|--------------|-------|-----------|-----------|------------------------------------|-------------------------------------|---------|--------------|-----------|-----------|--------------|-------------------|
| LOX_peak_88  | chr13 | 45491873  | 45492251  | Intergenic                         | tRNA-Glu-GAG [tRNA] tRNA            | 71551   | NM_012345    | 26747     | Hs.525006 | NM_012345    | HPRD-05073        |
| LOX_peak_101 | chr14 | 23398803  | 23399148  | promoter-TSS (NM_00128295)         | promoter-TSS (NM_00128295)          | 157     | NR_110002    | 101926933 | Hs.727321 | NR_110002    | ENS00000257285    |
| LOX_peak_98  | chr14 | 21149756  | 21150089  | Intergenic                         | Intergenic                          | -2414   | NM_001145    | 283       | Hs.283749 | NM_001145    | HPRD-00105        |
| LOX_peak_93  | chr14 | 21093402  | 21093870  | Intergenic                         | Intergenic                          | 16214   | NM_001001968 | 341799    | Hs.513132 | NM_001001968 | HPRD-17779        |
| LOX_peak_220 | chr16 | 26330370  | 26330732  | Intergenic                         | tRNA-Met-i [tRNA] tRNA              | -34841  | NM_001197249 | 11118     | Hs.376046 | NM_007047    | HPRD-12547        |
| LOX_peak_133 | chr16 | 87417458  | 87417841  | promoter-TSS (NM_024735)           | promoter-TSS (NM_024735)            | -250    | NM_024735    | 79791     | Hs.567582 | NM_024735    | NM_024735         |
| LOX_peak_325 | chr5  | 144537495 | 14453916  | Intergenic                         | tRNA-Leu-TTA [tRNA] tRNA            | 66051   | NM_003764    | 8676      | Hs.118958 | NM_003764    | NM_003764         |
| LOX_peak_207 | chr5  | 180615250 | 180616057 | Intergenic                         | Intergenic                          | 3255    | NR_108031    | 102577426 | Hs.277359 | NR_108031    | NR_108031         |
| LOX_peak_219 | chr6  | 26327722  | 26328588  | Intergenic                         | Intergenic                          | -37232  | NM_001197249 | 11118     | Hs.376046 | NM_007047    | HPRD-12547        |
| LOX_peak_70  | chr11 | 59323774  | 59324128  | Intergenic                         | tRNA-Lys-AAA [tRNA] tRNA            | 38680   | NR_036120    | 100422880 |           | NR_036120    |                   |
| LOX_peak_256 | chr6  | 27300613  | 27300934  | Intergenic                         | tRNA-Met-i [tRNA] tRNA              | 8233    | NR_045612    | 387316    | Hs.326753 | NM_032030    |                   |
| LOX_peak_34  | chr1  | 161432663 | 161433000 | Intergenic                         | CpG                                 | -42374  | NM_021642    | 2212      | Hs.352642 | NM_021642    | HPRD-00906        |
| LOX_peak_115 | chr15 | 79152828  | 79153141  | Intergenic                         | Intergenic                          | -12139  | NM_001265603 | 10933     | Hs.374503 | NM_006791    | NM_006791         |
| LOX_peak_212 | chr5  | 180648828 | 180649594 | TTS (NR_039781)                    | TTS (NR_039781)                     | 422     | NR_039781    | 100616342 |           | NR_039781    | miRBase:MI0017265 |
| LOX_peak_340 | chr9  | 35657639  | 35658149  | promoter-TSS (NM_00119520)         | promoter-TSS (NM_00119520)          | 121     | NR_003051    | 6023      | Hs.587502 | NR_003051    | ENS00000269900    |
| LOX_peak_39  | chr1  | 161499979 | 161500356 | Intergenic                         | tRNA-Leu-CTG [tRNA] tRNA            | 6131    | NM_002155    | 3310      | Hs.654614 | NM_002155    | HPRD-00775        |
| LOX_peak_11  | chr1  | 148598184 | 148598500 | intron (NR_104217, intron 2)       | tRNA-Asn-AAC [tRNA] tRNA            | 37495   | NM_173638    | 284565    | Hs.523572 | NM_173638    | HPRD-14710        |
| LOX_peak_231 | chr6  | 26571956  | 26572281  | Intergenic                         | tRNA-Ala-GCY [tRNA] tRNA            | -25053  | NM_013375    | 29777     | Hs.254406 | NM_013375    | HPRD-16469        |
| LOX_peak_142 | chr17 | 8125334   | 8126367   | non-coding (NR_026951, exon 2)     | non-coding (NR_026951, exon 2 of 2) | 1511    | NR_026951    | 284029    | Hs.121692 | NM_173621    | HPRD-08755        |
| LOX_peak_283 | chr6  | 27721033  | 27721355  | Intergenic                         | tRNA-Val-GTY [tRNA] tRNA            | -8329   | NR_038929    | 100131289 | Hs.200573 | NR_038929    |                   |
| LOX_peak_107 | chr14 | 102783290 | 102783636 | promoter-TSS (NM_00126787)         | promoter-TSS (NM_00126787)          | -251    | NM_00126787  | 55778     | Hs.743359 | NM_018335    | HPRD-18532        |
| LOX_peak_82  | chr12 | 98897900  | 98898225  | promoter-TSS (NR_038383)           | promoter-TSS (NR_038383)            | -429    | NR_038383    | 643770    | Hs.129589 | NR_038383    | ENS00000245017    |
| LOX_peak_211 | chr5  | 180645101 | 180645424 | Intergenic                         | Intergenic                          | 4371    | NR_039781    | 100616342 |           | NR_039781    | miRBase:MI0017265 |
| LOX_peak_161 | chr19 | 33667851  | 33668186  | Intergenic                         | CpG                                 | -17581  | NM_002333    | 4037      | Hs.515340 | NM_002333    |                   |
| LOX_peak_12  | chr1  | 148760155 | 148760553 | intron (NR_104217, intron 2 of 17) | intron (NR_104217, intron 2 of 17)  | -45661  | NM_001144032 | 730262    |           | NM_001144032 |                   |
| LOX_peak_172 | chr19 | 50607116  | 50607408  | promoter-TSS (NR_024215)           | promoter-TSS (NR_024215)            | 70      | NR_024229    | 100170216 | Hs.723094 | NR_024229    |                   |
| LOX_peak_222 | chr6  | 26521371  | 26521687  | promoter-TSS (NR_026790)           | promoter-TSS (NR_026790)            | -405    | NR_026790    | 493812    | Hs.272939 | NR_026790    | ENS00000228223    |
| LOX_peak_44  | chr1  | 167684569 | 167684903 | Intergenic                         | tRNA-Pro-CCY [tRNA] tRNA            | -6451   | NM_024569    | 9019      | Hs.493919 | NM_003953    | HPRD-05086        |
| LOX_peak_86  | chr13 | 31247938  | 31248313  | Intergenic                         | tRNA-Val-GTG [tRNA] tRNA            | -39487  | NM_001204406 | 241       | Hs.507658 | NM_001629    | HPRD-04742        |
| LOX_peak_16  | chr1  | 149298406 | 149298713 | Intergenic                         | tRNA-Val-GTG [tRNA] tRNA            | 11108   | NR_111934    | 644634    | Hs.723057 | NR_111934    |                   |
| LOX_peak_314 | chr6  | 28863842  | 28864225  | promoter-TSS (NR_104117)           | promoter-TSS (NR_104117)            | -274    | NR_104117    | 414760    | Hs.211005 | NR_104117    |                   |
| LOX_peak_264 | chr6  | 27487195  | 27487496  | Intergenic                         | tRNA-Gln-CAG [tRNA] tRNA            | -46448  | NM_007149    | 7738      | Hs.158174 | NM_007149    | HPRD-03785        |
| LOX_peak_317 | chr6  | 28912227  | 28912548  | TTS (NR_103538), 5                 | TTS (NR_103538), 5                  | 826     | NR_103538    | 729583    | Hs.453549 | NR_103538    |                   |
| LOX_peak_286 | chr6  | 27870160  | 27870857  | Intergenic                         | Intergenic                          | 9305    | NM_003527    | 8348      | Hs.484991 | NM_003527    | HPRD-11904        |
| LOX_peak_287 | chr6  | 28180714  | 28181068  | Intergenic                         | tRNA-Ser-AGY [tRNA] tRNA            | 5816    | NR_029396    | 222699    | Hs.161441 | NR_029396    |                   |
| LOX_peak_318 | chr6  | 28918706  | 28919029  | Intergenic                         | tRNA-Lys-AAA [tRNA] tRNA            | 7306    | NR_103538    | 729583    | Hs.453549 | NR_103538    |                   |
| LOX_peak_267 | chr6  | 27515395  | 27515696  | Intergenic                         | tRNA-Gln-CAG [tRNA] tRNA            | -74648  | NM_007149    | 7738      | Hs.158174 | NR_007149    | HPRD-03785        |
| LOX_peak_121 | chr16 | 3207206   | 32071615  | Intergenic                         | tRNA-Lys-AAG [tRNA] tRNA            | 22276   | NM_001134655 | 7760      | Hs.115284 | NM_004220    | HPRD-12224        |
| LOX_peak_151 | chr17 | 47269758  | 47270104  | Intergenic                         | CpG                                 | 16812   | NM_031498    | 2793      | Hs.181781 | NM_031498    | HPRD-06792        |
| LOX_peak_246 | chr6  | 27144841  | 27145124  | Intergenic                         | A-rich [Low complexity] Low comp    | 29577   | NR_036096    | 100422934 |           | NR_036096    | miRBase:MI0014167 |
| LOX_peak_336 | chr8  | 67026224  | 67026635  | Intergenic                         | tRNA-Ala-GCY [tRNA] tRNA            | -12849  | NM_184087    | 84675     | Hs.85524  | NR_033058    | HPRD-05927        |
| LOX_peak_206 | chr5  | 180614601 | 180614982 | Intergenic                         | Intergenic                          | 4117    | NR_108031    | 102577426 | Hs.277359 | NR_108031    |                   |
| LOX_peak_226 | chr6  | 26553623  | 26553971  | Intergenic                         | tRNA-Ala-GCG [tRNA] tRNA            | 15225   | NM_006353    | 10473     | Hs.236774 | NM_006353    |                   |
| LOX_peak_311 | chr6  | 28806407  | 28806394  | Intergenic                         | Intergenic                          | 25234   | NR_033379    | 401242    | Hs.448285 | NR_033379    | ENS00000225595    |
| LOX_peak_147 | chr17 | 37023795  | 37024120  | Intergenic                         | tRNA-Cys-TGY [tRNA] tRNA            | -2155   | NR_073384    | 3927      | Hs.741156 | NM_006148    | HPRD-04229        |
| LOX_peak_1   | chr1  | 16872289  | 16872622  | Intergenic                         | tRNA-Gly-GCG [tRNA] tRNA            | -2954   | NR_037446    | 100500876 |           | NR_037446    | miRBase:MI0016076 |
| LOX_peak_91  | chr14 | 21078194  | 21078515  | Intergenic                         | tRNA-Leu-CTG [tRNA] tRNA            | -19372  | NM_001024822 | 493901    | Hs.729466 | NM_001024822 | HPRD-18667        |
| LOX_peak_259 | chr7  | 27447335  | 27447703  | Intergenic                         | tRNA-Asp-GAY [tRNA] tRNA            | -6622   | NM_007149    | 7738      | Hs.158174 | NM_007149    | HPRD-03785        |
| LOX_peak_331 | chr7  | 149388136 | 149388441 | Intergenic                         | tRNA-Cys-TGY [tRNA] tRNA            | -23814  | NM_032534    | 84626     | Hs.299560 | NM_032534    | HPRD-11167        |
| LOX_peak_158 | chr19 | 3383230   | 3383811   | promoter-TSS (NM_024407)           | promoter-TSS (NM_024407)            | -363    | NM_024407    | 374291    | Hs.211914 | NM_024407    |                   |
| LOX_peak_319 | chr6  | 28920882  | 28921239  | Intergenic                         | tRNA-Met [tRNA] tRNA                | 9499    | NR_103538    | 729583    | Hs.453549 | NR_103538    |                   |
| LOX_peak_106 | chr14 | 73429566  | 73429883  | Intergenic                         | tRNA-Cys-TGY [tRNA] tRNA            | 23940   | NM_178441    | 53349     | Hs.335106 | NM_021260    | HPRD-12017        |
| LOX_peak_47  | chr1  | 222638232 | 222638540 | Intergenic                         | tRNA-Thr-ACA [tRNA] tRNA            | 83058   | NM_024746    | 79802     | Hs.665660 | NM_024746    | HPRD-08587        |
| LOX_peak_92  | chr14 | 21081348  | 21082136  | Intergenic                         | Intergenic                          | -22760  | NM_001024822 | 493901    | Hs.729466 | NM_001024822 | HPRD-18667        |
| LOX_peak_182 | chr2  | 43037611  | 43037895  | Intergenic                         | tRNA-Ile-ATA [tRNA] tRNA            | -18002  | NM_012205    | 23498     | Hs.368805 | NM_012205    | HPRD-05158        |
| LOX_peak_284 | chr6  | 27759829  | 27759289  | Intergenic                         | Intergenic                          | 16600   | NM_003519    | 8340      | Hs.137594 | NM_003519    | HPRD-11898        |
| LOX_peak_27  | chr1  | 161417867 | 161418202 | Intergenic                         | CpG                                 | -57171  | NM_021642    | 2212      | Hs.352642 | NM_021642    | HPRD-00906        |
| LOX_peak_166 | chr19 | 48426920  | 48427257  | promoter-TSS (NR_024227)           | promoter-TSS (NR_024227)            | 52      | NR_024229    | 100170216 | Hs.723094 | NR_024229    |                   |
| LOX_peak_66  | chr10 | 22518293  | 22518623  | Intergenic                         | tRNA-Asn-AAC [tRNA] tRNA            | -19546  | NM_001199938 | 340900    | Hs.450519 | NM_001199938 | ENS00000223601    |
| LOX_peak_353 | chrX  | 18692894  | 18693212  | Intergenic                         | tRNA-Val-GTA [tRNA] tRNA            | -2830   | NM_000330    | 6247      | Hs.715725 | NM_000330    | HPRD-02426        |
| LOX_peak_324 | chr6  | 126101251 | 126101581 | promoter-TSS (NM_001199619)        | promoter-TSS (NM_001199619)         | -891    | NM_001199619 | 135112    | Hs.171426 | NM_181782    | HPRD-14814        |
| LOX_peak_274 | chr6  | 27573301  | 27573166  | Intergenic                         | tRNA-Leu-TTG [tRNA] tRNA            | -88356  | NR_038293    | 100507173 | Hs.635987 | NR_038293    |                   |
| LOX_peak_295 | chr6  | 28615865  | 28616162  | Intergenic                         | tRNA-Thr-ACA [tRNA] tRNA            | -60901  | NM_052923    | 114821    | Hs.176980 | NM_052923    | HPRD-11720        |
| LOX_peak_76  | chr11 | 68227341  | 68227786  | promoter-TSS (NM_0011641)          | promoter-TSS (NM_0011641)           | -578    | NM_0011641   | 55291     | Hs.503022 | NM_018312    | HPRD-10703        |
| LOX_peak_217 | chr6  | 26312716  | 26313540  | Intergenic                         | Intergenic                          | -27401  | NM_003543    | 8365      | Hs.591790 | NM_003543    | HPRD-11919        |
| LOX_peak_160 | chr19 | 18392452  | 18392761  | promoter-TSS (NR_036155)           | promoter-TSS (NR_036155)            | -140    | NM_001286968 | 3727      | Hs.2780   | NM_005354    | HPRD-01304        |
| LOX_peak_136 | chr17 | 8024122   | 8024450   | 3' UTR (NM_032580, exon 4 of 4)    | 3' UTR (NM_032580, exon 4 of 4)     | -2052   | NM_001165960 | 59344     | Hs.232770 | NM_021628    | HPRD-06231        |
| LOX_peak_118 | chr16 | 686601    | 686694    | promoter-TSS (NM_032366)           | promoter-TSS (NM_032366)            | -405    | NR_109979    | 84326     | Hs.239500 | NM_032366    | HPRD-17482        |
| LOX_peak_74  | chr11 | 66115487  | 66115842  | promoter-TSS (NM_006876)           | promoter-TSS (NM_006876)            | -503    | NM_006876    | 11041     | Hs.8526   | NM_006876    | HPRD-09270        |
| LOX_peak_156 | chr19 | 893388    | 893737    | promoter-TSS (NM_005481)           | promoter-TSS (NM_005481)            | 78      | NR_125730    | 103625684 |           | NR_125730    |                   |
| LOX_peak_292 | chr6  | 28564994  | 28565294  | Intergenic                         | tRNA-Ser-AGY [tRNA] tRNA            | -10032  | NM_052923    | 114821    | Hs.176980 | NM_052923    | HPRD-11720        |
| LOX_peak_213 | chr6  | 26286641  | 26286952  | Intergenic                         | tRNA-Met-i [tRNA] tRNA              | -1069   | NM_003543    | 8365      | Hs.591790 | NM_003543    | HPRD-11919        |
| LOX_peak_224 | chr6  | 26537607  | 26537967  | promoter-TSS (NM_006353)           | promoter-TSS (NM_006353)            | -785    | NM_006353    | 10473     | Hs.236774 | NM_006353    |                   |
| LOX_peak_144 | chr17 | 19411387  | 19411720  | Intergenic                         | tRNA-Trp-TGG [tRNA] tRNA            | -25614  | NM_018242    | 55244     | Hs.232054 | NM_018242    | HPRD-07703        |
| LOX_peak_281 | chr6  | 27655889  | 27656243  | Intergenic                         | Intergenic                          | -5748   | NR_038293    | 100507173 | Hs.635987 | NR_038293    |                   |
| LOX_peak_290 | chr6  | 28510733  | 28511066  | Intergenic                         | tRNA-Arg-CGA [tRNA] tRNA            | 17110   | NM_003996    | 2880      | Hs.248129 | NM_001509    | HPRD-11941        |
| LOX_peak_178 | chr19 | 50636889  | 50637203  | promoter-TSS (NR_024230)           | promoter-TSS (NR_024230)            | 75      | NR_024230    | 100170217 | Hs.723095 | NR_024230    |                   |
| LOX_peak_100 | chr14 | 21152101  | 21152402  | promoter-TSS (NM_001145)           | promoter-TSS (NM_001145)            | -85     | NM_001145    | 283       | Hs.283749 | NM_001145    | HPRD-00105        |
| LOX_peak_312 | chr6  | 28831349  | 28831656  | promoter-TSS (NR_033379), 3        | promoter-TSS (NR_033379), 3         | -48     | NR_033379    | 401242    | Hs.448285 | NR_033379    | ENS00000225595    |
| LOX_peak_232 | chr6  | 26577269  | 26577542  | Intergenic                         | tRNA-Tyr-TAC [tRNA] tRNA            | -19766  | NM_013375    | 29777     | Hs.254406 | NM_013375    | HPRD-16469        |
| LOX_peak_271 | chr6  | 27594964  | 27598914  | Intergenic                         | tRNA-Lys-AAA [tRNA] tRNA            | -102175 | NR_038293    | 100507173 | Hs.635987 | NR_038293    |                   |
| LOX_peak_316 | chr6  | 28911277  | 28911576  | promoter-TSS (NR_103538), 5        | promoter-TSS (NR_103538), 5         | -135    | NR_103538    | 729583    | Hs.453549 | NR_103538    |                   |
| LOX_peak_310 | chr6  | 28784880  | 28785195  | Intergenic                         | tRNA-Ala-GCA [tRNA] tRNA            | 46417   | NR_033379    | 401242    | Hs.448285 | NR_033379    | ENS00000225595    |
| LOX_peak_146 | chr17 | 36907894  | 36908236  | promoter-TSS (NM_002795)           | promoter-TSS (NM_002795)            | -901    | NR_104194    | 5691      | Hs.82793  | NM_0027      |                   |

|              |       |           |           |                                 |                             |         |              |           |           |              |                   |
|--------------|-------|-----------|-----------|---------------------------------|-----------------------------|---------|--------------|-----------|-----------|--------------|-------------------|
| LOX_peak_327 | chr7  | 148638446 | 148638768 | Intergenic                      | HY5 [scRNA] scRNA           | -57166  | NM_001203248 | 2146      | Hs.444082 | NM_004456    | HPRD:03342        |
| LOX_peak_321 | chr6  | 28949879  | 28950209  | Intergenic                      | HRNA-Glu-GAG [tRNA] tRNA    | 22993   | NM_001010877 | 282890    | Hs.148218 | NM_001010877 | HPRD:18325        |
| LOX_peak_125 | chr16 | 3232516   | 3232856   | Intergenic                      | HRNA-Pro-CYC [tRNA] tRNA    | -21561  | NM_012360    | 4992      | Hs.664502 | NM_012360    | HPRD:09125        |
| LOX_peak_330 | chr7  | 148684127 | 148684404 | Intergenic                      | HY1 [scRNA] scRNA           | 41517   | NM_004911    | 9601      | Hs.93659  | NM_004911    | HPRD:06501        |
| LOX_peak_37  | chr1  | 161440057 | 161440353 | Intergenic                      | CpG                         | -35000  | NM_021642    | 2212      | Hs.352642 | NM_021642    | HPRD:09096        |
| LOX_peak_266 | chr6  | 27513326  | 27513686  | Intergenic                      | HRNA-Ser-TCA [tRNA] tRNA    | -72609  | NM_007149    | 7738      | Hs.158174 | NM_007149    | HPRD:03785        |
| LOX_peak_96  | chr14 | 21121090  | 21121457  | Intergenic                      | HRNA-Tyr-TAC [tRNA] tRNA    | -11423  | NM_001001968 | 341799    | Hs.513132 | NM_001001968 | HPRD:17779        |
| LOX_peak_45  | chr1  | 203429641 | 203430106 | Intergenic                      | AluSg [SINE] Alu            | -15010  | NM_002725    | 5549      | Hs.632481 | NM_002725    | HPRD:03556        |
| LOX_peak_249 | chr6  | 27198079  | 27198501  | Intergenic                      | Intergenic                  | -17212  | NM_005865    | 10279     | Hs.274407 | NM_005865    | HPRD:06205        |
| LOX_peak_263 | chr6  | 274373449 | 274373769 | Intergenic                      | HRNA-Ser-TCA [tRNA] tRNA    | -32712  | NM_007149    | 7738      | Hs.158174 | NM_007149    | HPRD:03785        |
| LOX_peak_75  | chr11 | 66189118  | 66189463  | Intron (NM_178864, intron 1)    | CpG                         | 815     | NM_178864    | 266743    | Hs.256036 | NM_178864    | HPRD:12260        |
| LOX_peak_285 | chr6  | 27763510  | 27763831  | Intergenic                      | HRNA-Gln-CAA [tRNA] tRNA    | 12039   | NM_003519    | 8340      | Hs.137594 | NM_003519    | HPRD:11898        |
| LOX_peak_123 | chr16 | 3232574   | 32325885  | Intergenic                      | HRNA-Lys-AAG [tRNA] tRNA    | -28518  | NM_012360    | 4992      | Hs.664502 | NM_012360    | HPRD:09125        |
| LOX_peak_342 | chr9  | 137029461 | 137029758 | promoter-TSS (NR_023344)        | promoter-TSS (NR_023344)    | 77      | NR_023344    | 100151684 | Hs.545589 | NR_023344    | ENSG00000221676   |
| LOX_peak_255 | chr6  | 27265663  | 27266009  | Intergenic                      | HRNA-Ser-AGY [tRNA] tRNA    | 14175   | NM_033482    | 94026     | Hs.729955 | NM_033482    | ENSG00000158553   |
| LOX_peak_214 | chr6  | 26305566  | 26305860  | Intergenic                      | Intergenic                  | -19986  | NM_003543    | 8365      | Hs.591790 | NM_003543    | HPRD:11919        |
| LOX_peak_157 | chr19 | 1021444   | 1021751   | promoter-TSS (NM_033420)        | promoter-TSS (NM_033420)    | 76      | NR_125730    | 103625684 | NR_125730 |              |                   |
| LOX_peak_247 | chr6  | 27181529  | 27181790  | Intergenic                      | HRNA-Arg-CGY [tRNA] tRNA    | -33843  | NM_005865    | 10279     | Hs.274407 | NM_005865    | HPRD:06205        |
| LOX_peak_122 | chr16 | 3230768   | 32309110  | Intergenic                      | CpG                         | 23805   | NM_001134655 | 7760      | Hs.115284 | NM_004220    | HPRD:12224        |
| LOX_peak_204 | chr5  | 180596536 | 180596813 | Intergenic                      | HRNA-Val-GTY [tRNA] tRNA    | 14731   | NM_206880    | 285659    | Hs.553681 | NM_206880    | HPRD:14956        |
| LOX_peak_201 | chr5  | 180523967 | 180524618 | Intergenic                      | Intergenic                  | 28012   | NM_001258283 | 26693     | Hs.742585 | NM_001258283 | ENSG00000185372   |
| LOX_peak_301 | chr6  | 28697012  | 28697307  | Intergenic                      | HRNA-Ala-GCY [tRNA] tRNA    | 134295  | NR_033379    | 401242    | Hs.448285 | NR_033379    | ENSG00000225595   |
| LOX_peak_305 | chr6  | 28757439  | 28757723  | Intergenic                      | HRNA-Ala-GCA [tRNA] tRNA    | 73873   | NR_033379    | 401242    | Hs.448285 | NR_033379    | ENSG00000225595   |
| LOX_peak_257 | chr6  | 27302667  | 27302927  | Intergenic                      | HRNA-Lys-AAA [tRNA] tRNA    | 10257   | NR_045612    | 387316    | Hs.326753 | NM_032030    |                   |
| LOX_peak_24  | chr1  | 161410538 | 161410791 | Intergenic                      | CpG                         | -64541  | NM_021642    | 2212      | Hs.352642 | NM_021642    | HPRD:09096        |
| LOX_peak_68  | chr11 | 5242682   | 5242766   | TTS (NM_000518)                 | TTS (NM_000518)             | 1527    | NM_000518    | 3043      | Hs.500258 | NM_000518    | HPRD:00786        |
| LOX_peak_192 | chr3  | 169489951 | 169490210 | promoter-TSS (NR_033703)        | promoter-TSS (NR_033703)    | -773    | NM_018657    | 55892     | Hs.507205 | NM_018657    | HPRD:06920        |
| LOX_peak_163 | chr19 | 45981672  | 45982000  | Intergenic                      | Intergenic                  | 10583   | NM_006732    | 2354      | Hs.590958 | NM_006732    | HPRD:01270        |
| LOX_peak_308 | chr6  | 28770407  | 28770722  | Intergenic                      | Intergenic                  | 60890   | NR_033379    | 401242    | Hs.448285 | NR_033379    | ENSG00000225595   |
| LOX_peak_242 | chr6  | 27059448  | 27059723  | Intergenic                      | HRNA-Pro-CCG [tRNA] tRNA    | 40990   | NM_021058    | 8970      | Hs.591807 | NM_021058    |                   |
| LOX_peak_10  | chr1  | 148248044 | 148248302 | intron (NR_102404, intron 6)    | HRNA-Asn-AAC [tRNA] tRNA    | -45637  | NM_001164261 | 645142    | Hs.730589 | NM_001164261 | ENSG00000256374   |
| LOX_peak_320 | chr6  | 28949326  | 28949599  | Intergenic                      | HRNA-Phe-TTY [tRNA] tRNA    | 23575   | NM_001010877 | 282890    | Hs.148218 | NM_001010877 | HPRD:18325        |
| LOX_peak_329 | chr7  | 148680748 | 148681087 | Intergenic                      | HY3 [scRNA] scRNA           | 44865   | NM_004911    | 9601      | Hs.93659  | NM_004911    | HPRD:06501        |
| LOX_peak_114 | chr15 | 68132186  | 68132529  | promoter-TSS (NR_125730)        | promoter-TSS (NR_125730)    | 26      | NR_125730    | 103625684 | NR_125730 |              |                   |
| LOX_peak_117 | chr16 | 22301971  | 22310010  | intron (NM_001258035, intron 1) | MIR [SINE] MIR              | 1167    | NM_001258035 | 55718     | Hs.460298 | NM_018119    | HPRD:15155        |
| LOX_peak_309 | chr6  | 28775502  | 28775790  | Intergenic                      | HRNA-Phe-TTY [tRNA] tRNA    | 55808   | NR_033379    | 401242    | Hs.448285 | NR_033379    | ENSG00000225595   |
| LOX_peak_254 | chr6  | 27263111  | 27263441  | Intergenic                      | HRNA-Gln-CAG [tRNA] tRNA    | 16735   | NM_033482    | 94026     | Hs.729955 | NM_033482    | ENSG00000158553   |
| LOX_peak_299 | chr6  | 28687449  | 28687734  | Intergenic                      | Intergenic                  | -132479 | NM_052923    | 114821    | Hs.176980 | NM_052923    | HPRD:11770        |
| LOX_peak_94  | chr14 | 21099174  | 21099482  | Intergenic                      | HRNA-Thr-ACA [tRNA] tRNA    | 10522   | NM_001001968 | 341799    | Hs.513132 | NM_001001968 | HPRD:17779        |
| LOX_peak_282 | chr6  | 27688758  | 27689067  | Intergenic                      | HRNA-Leu-TTA [tRNA] tRNA    | 27054   | NR_038292    | 100507173 | Hs.635987 | NR_038292    |                   |
| LOX_peak_250 | chr6  | 27203192  | 27203471  | Intergenic                      | HRNA-Val-GTY [tRNA] tRNA    | -12171  | NM_005865    | 10279     | Hs.274407 | NM_005865    | HPRD:06205        |
| LOX_peak_239 | chr6  | 26758379  | 26758694  | Intergenic                      | Intergenic                  | -98556  | NM_001242799 | 79692     | Hs.126280 | NM_024639    |                   |
| LOX_peak_300 | chr6  | 28693713  | 28694028  | Intergenic                      | Intergenic                  | 137584  | NR_033379    | 401242    | Hs.448285 | NR_033379    | ENSG00000225595   |
| LOX_peak_270 | chr6  | 27551155  | 27551428  | Intergenic                      | HRNA-Asp-GAY [tRNA] tRNA    | -110374 | NM_007149    | 7738      | Hs.158174 | NM_007149    | HPRD:03785        |
| LOX_peak_304 | chr6  | 28715450  | 28715818  | Intergenic                      | Intergenic                  | 115820  | NR_033379    | 401242    | Hs.448285 | NR_033379    | ENSG00000225595   |
| LOX_peak_241 | chr6  | 26773652  | 26773887  | Intergenic                      | Intergenic                  | -113789 | NM_001242799 | 79692     | Hs.126280 | NM_024639    |                   |
| LOX_peak_148 | chr17 | 37025427  | 37025701  | promoter-TSS (NM_006148)        | promoter-TSS (NM_006148)    | -548    | NR_073384    | 3927      | Hs.741156 | NM_006148    | HPRD:04229        |
| LOX_peak_2   | chr1  | 17004643  | 17004922  | Intergenic                      | HRNA-Gly-GGG [tRNA] tRNA    | -2968   | NR_037446    | 100500876 | NR_037446 |              | miRBase:MI0016076 |
| LOX_peak_87  | chr13 | 41634754  | 41635036  | promoter-TSS (NM_007187)        | promoter-TSS (NM_007187)    | -808    | NM_007187    | 11193     | Hs.411300 | NM_007187    | HPRD:16086        |
| LOX_peak_245 | chr6  | 27130007  | 27130257  | Intergenic                      | Intergenic                  | 14727   | NR_036096    | 100422934 | NR_036096 |              | miRBase:MI0014167 |
| LOX_peak_258 | chr6  | 27446623  | 27446816  | Intergenic                      | HRNA-Ser-TCY [tRNA] tRNA    | -5772   | NM_007149    | 7738      | Hs.158174 | NM_007149    | HPRD:03785        |
| LOX_peak_275 | chr6  | 27599153  | 27599455  | Intergenic                      | Intergenic                  | -62510  | NR_038293    | 100507173 | Hs.635987 | NR_038292    |                   |
| LOX_peak_251 | chr6  | 27205186  | 27205506  | Intergenic                      | Intergenic                  | -10156  | NM_005865    | 10279     | Hs.274407 | NM_005865    | HPRD:06205        |
| LOX_peak_103 | chr14 | 50053224  | 50053692  | promoter-TSS (NM_001032)        | promoter-TSS (NM_001032)    | -324    | NM_001030001 | 6235      | Hs.156367 | NM_001032    | HPRD:04698        |
| LOX_peak_303 | chr6  | 28710589  | 28710866  | Intergenic                      | Intergenic                  | 120727  | NR_033379    | 401242    | Hs.448285 | NR_033379    | ENSG00000225595   |
| LOX_peak_261 | chr6  | 27470749  | 27471023  | Intergenic                      | HRNA-Ser-TCY [tRNA] tRNA    | -29989  | NM_007149    | 7738      | Hs.158174 | NM_007149    | HPRD:03785        |
| LOX_peak_203 | chr5  | 180591104 | 180591353 | Intergenic                      | Intergenic                  | 9285    | NM_206880    | 285659    | Hs.553681 | NM_206880    | HPRD:14956        |
| LOX_peak_199 | chr5  | 171730896 | 171731186 | Intergenic                      | L1MB7 [LINE] L1             | -20246  | NM_152277    | 92181     | Hs.131570 | NM_152277    | HPRD:13118        |
| LOX_peak_328 | chr7  | 148660342 | 148660593 | Intergenic                      | HY4 [scRNA] scRNA           | 65315   | NM_004911    | 9601      | Hs.93659  | NM_004911    | HPRD:06501        |
| LOX_peak_236 | chr6  | 26728164  | 26728421  | Intergenic                      | HRNA-Ala-GCY [tRNA] tRNA    | -68312  | NM_001242799 | 79692     | Hs.126280 | NM_024639    |                   |
| LOX_peak_228 | chr6  | 26555409  | 26555658  | Intergenic                      | HRNA-Pro-CYC [tRNA] tRNA    | 16961   | NM_006353    | 10473     | Hs.236774 | NM_006353    | HPRD:09951        |
| LOX_peak_116 | chr15 | 80036948  | 80037171  | Intergenic                      | HRNA-Cys-TGY [tRNA] tRNA    | 152280  | NR_037654    | 10588     | Hs.194294 | NM_006441    |                   |
| LOX_peak_272 | chr6  | 27560500  | 27560757  | Intergenic                      | HRNA-Met-1 [tRNA] tRNA      | -101186 | NR_038293    | 100507173 | Hs.635987 | NR_038292    |                   |
| LOX_peak_288 | chr6  | 28442164  | 28442513  | Intergenic                      | HRNA-Thr-ACG [tRNA] tRNA    | -31059  | NM_001012455 | 222696    | Hs.721841 | NM_001012455 | ENSG00000187987   |
| LOX_peak_260 | chr6  | 27463521  | 27463818  | Intergenic                      | HRNA-Ser-TCY [tRNA] tRNA    | -22772  | NM_007149    | 7738      | Hs.158174 | NM_007149    | HPRD:03785        |
| LOX_peak_221 | chr6  | 26331560  | 26331833  | Intergenic                      | HRNA-Trp-TGG [tRNA] tRNA    | -33691  | NM_001197249 | 11118     | Hs.376046 | NM_007047    | HPRD:12547        |
| LOX_peak_294 | chr6  | 28611120  | 28611433  | Intergenic                      | HRNA-Ala-GCG [tRNA] tRNA    | -56164  | NM_052923    | 114821    | Hs.176980 | NM_052923    | HPRD:11720        |
| LOX_peak_293 | chr6  | 28574787  | 28575094  | Intergenic                      | HRNA-Ala-GCA [tRNA] tRNA    | -19828  | NM_052923    | 114821    | Hs.176980 | NM_052923    | HPRD:11720        |
| LOX_peak_3   | chr1  | 45272999  | 45273224  | promoter-TSS (NM_001013632)     | promoter-TSS (NM_001013632) | -154    | NM_001013632 | 343521    | Hs.585137 | NM_001013632 | HPRD:15762        |
| LOX_peak_252 | chr6  | 27247968  | 27248203  | Intergenic                      | HRNA-Val-GTG [tRNA] tRNA    | 31926   | NM_033482    | 94026     | Hs.729955 | NM_033482    | ENSG00000158553   |
| LOX_peak_306 | chr6  | 28758420  | 28758650  | Intergenic                      | HRNA-Phe-TTY [tRNA] tRNA    | 72919   | NR_033379    | 401242    | Hs.448285 | NR_033379    | ENSG00000225595   |
| LOX_peak_42  | chr1  | 161591400 | 161591630 | Intergenic                      | HRNA-Asn-AAC [tRNA] tRNA    | 9322    | NM_001271036 | 2215      | Hs.372679 | NM_000570    |                   |
| LOX_peak_235 | chr6  | 26705534  | 26705786  | Intergenic                      | HRNA-Ala-GCY [tRNA] tRNA    | -45680  | NM_001242799 | 79692     | Hs.126280 | NM_024639    |                   |
| LOX_peak_238 | chr6  | 26745173  | 26745413  | Intergenic                      | HRNA-Ile-ATT [tRNA] tRNA    | -85313  | NM_001242799 | 79692     | Hs.126280 | NM_024639    |                   |
| LOX_peak_124 | chr16 | 3230478   | 3230723   | Intergenic                      | HRNA-Lys-AAG [tRNA] tRNA    | -23647  | NM_012360    | 4992      | Hs.664502 | NM_012360    | HPRD:09125        |
| LOX_peak_216 | chr6  | 26311868  | 26312106  | Intergenic                      | HRNA-Gln-CAA [tRNA] tRNA    | -26260  | NM_003543    | 8365      | Hs.591790 | NM_003543    | HPRD:11919        |
| LOX_peak_248 | chr6  | 27182916  | 27183122  | Intergenic                      | HRNA-Arg-CGY [tRNA] tRNA    | -32483  | NM_005865    | 10279     | Hs.274407 | NM_005865    | HPRD:06205        |
| LOX_peak_18  | chr1  | 149684079 | 149684316 | Intergenic                      | Intergenic                  | -70053  | NM_000566    | 2209      | Hs.77424  | NM_000566    | HPRD:09094        |
| LOX_peak_104 | chr14 | 50329179  | 50329581  | Intergenic                      | 7SLRNA [srRNA] srRNA        | -9841   | NM_004713    | 9147      | Hs.655964 | NM_004713    | HPRD:08494        |
| LOX_peak_302 | chr6  | 28703112  | 28703372  | Intergenic                      | HRNA-Ala-GCA [tRNA] tRNA    | 128212  | NR_033379    | 401242    | Hs.448285 | NR_033379    | ENSG00000225595   |
| LOX_peak_341 | chr9  | 131102242 | 131102563 | promoter-TSS (NM_005094)        | promoter-TSS (NM_005094)    | -437    | NM_005094    | 10999     | Hs.656699 | NM_005094    | HPRD:09172        |
| LOX_peak_205 | chr5  | 180600568 | 180601059 | Intergenic                      | Intergenic                  | 18095   | NR_108031    | 102577426 | Hs.277359 | NR_108031    |                   |
| LOX_peak_332 | chr8  | 17325514  | 17325790  | Intergenic                      | Intergenic                  | -1945   | NM_001008539 | 6542      | Hs.448520 | NM_003046    | HPRD:03524        |
| LOX_peak_23  | chr1  | 161409861 | 161410098 | Intergenic                      | HRNA-Gly-GGA [tRNA] tRNA    | -65226  | NM_021642    | 2212      | Hs.352642 | NM_021642    | HPRD:09096        |
| LOX_peak_28  | chr1  | 161418609 | 16        |                                 |                             |         |              |           |           |              |                   |

|              |      |           |           |                              |                              |         |              |           |           |              |                   |
|--------------|------|-----------|-----------|------------------------------|------------------------------|---------|--------------|-----------|-----------|--------------|-------------------|
| LOX_peak_200 | chr5 | 173193831 | 173194050 | Intergenic                   | AluY SINE Alu                | -20728  | NR_108027    | 101928136 | Hs.449267 | NR_108027    |                   |
| LOX_peak_339 | chr8 | 144536642 | 144536838 | intron (NM_015117, intron 9) | AluY SINE Alu                | -24138  | NM_201589    | 389692    | Hs.521914 | NM_201589    | HPRD:14346        |
| LOX_peak_355 | chrY | 13457125  | 13457388  | Intergenic                   | (CATT)n Satellite Satellite  | 1076133 | NR_033667    | 352887    | Hs.546221 | NR_033667    | ENSG00000206159   |
| LOX_peak_185 | chr2 | 133002137 | 133002405 | intron (NR_027020, intron 1) | ALR/Alpha Satellite centr    | 12382   | NR_031608    | 100313824 |           | NR_031608    | miRBase:MI0006336 |
| LOX_peak_323 | chr6 | 61911420  | 61911706  | Intergenic                   | ALR/Alpha Satellite centr    | -372445 | NM_001190706 | 100463487 |           | NM_001190706 | ENSG00000255633   |
| LOX_peak_354 | chrY | 13453432  | 13453678  | Intergenic                   | (CATT)n Satellite Satellite  | 1079834 | NR_033667    | 352887    | Hs.546221 | NR_033667    | ENSG00000206159   |
| LOX_peak_194 | chr4 | 49633440  | 49633710  | Intergenic                   | (GAATG)n Satellite Satellite | 644916  | NM_001286791 | 80157     | Hs.479703 | NM_025087    | HPRD:08638        |
| LOX_peak_334 | chr8 | 43096663  | 43096868  | Intergenic                   | SAR Satellite Satellite      | -50820  | NM_001002920 | 340441    | Hs.531579 | NM_001002920 |                   |

| PeakID (cmd=annotatePeaks.pl A2780_CH | Chr   | Start     | End       | Annotation         | Detailed Annotation     | Distance to TSS | Nearest Prom | Entrez ID | Nearest Unigene | Nearest Refseq | Nearest Ensembl   |
|---------------------------------------|-------|-----------|-----------|--------------------|-------------------------|-----------------|--------------|-----------|-----------------|----------------|-------------------|
| A2780_CH390_inp_peak_160              | chr9  | 35657586  | 35658085  | promoter-TSS (NM   | promoter-TSS (NM_001195 | 180             | NR_030051    | 6023      | HS.587502       | NR_030051      | ENSG00000269900   |
| A2780_CH390_inp_peak_3                | chr1  | 145396642 | 145397141 | intron (NM_001039  | intron (NM_001039       | -16300          | NM_213653    | 148738    | HS.632436       | NM_145277      | HPRD:10521        |
| A2780_CH390_inp_peak_111              | chr21 | 11058914  | 11059413  | intron (NM_182484  | intron (NM_182484       | 39762           | NM_181704    | 85317     | HS.545789       | NM_181704      |                   |
| A2780_CH390_inp_peak_122              | chr5  | 180633651 | 180634150 | Intergenic         | Intergenic              | -1607           | NM_203293    | 81786     | HS.487412       | NM_033342      | HPRD:11648        |
| A2780_CH390_inp_peak_145              | chr6  | 28805972  | 28806471  | Intergenic         | Intergenic              | 25233           | NR_033379    | 401242    | HS.448285       | NR_033379      | ENSG00000225595   |
| A2780_CH390_inp_peak_117              | chr5  | 180600454 | 180600953 | Intergenic         | Intergenic              | 18205           | NR_108031    | 102577426 | HS.277359       | NR_108031      |                   |
| A2780_CH390_inp_peak_35               | chr1  | 228768172 | 228768671 | Intergenic         | CpG                     | -11973          | NR_037962    | 58480     | HS.647774       | NM_012205      | HPRD:06965        |
| A2780_CH390_inp_peak_91               | chr17 | 8125923   | 8126422   | non-coding (NR_026 | non-coding (NR_026951   | 1189            | NR_026951    | 284029    | HS.121692       | NM_173621      | HPRD:08755        |
| A2780_CH390_inp_peak_74               | chr15 | 89878116  | 89878615  | promoter-TSS (NM   | promoter-TSS (NM_001126 | -339            | NM_002693    | 5428      | HS.706868       | NM_002693      | HPRD:01438        |
| A2780_CH390_inp_peak_62               | chr14 | 21093353  | 21093852  | Intergenic         | Intergenic              | 16248           | NM_001001    | 341799    | HS.513132       | NM_001001968   | HPRD:17779        |
| A2780_CH390_inp_peak_96               | chr17 | 66015793  | 66016292  | Intergenic         | Intergenic              | -15806          | NM_002266    | 3838      | HS.594238       | NM_002266      | HPRD:02818        |
| A2780_CH390_inp_peak_97               | chr17 | 73029796  | 73030295  | intron (NR_110835  | Intergenic              | 1383            | NR_110835    | 23510     | HS.514468       | NM_015353      | HPRD:17176        |
| A2780_CH390_inp_peak_52               | chr11 | 75946651  | 75947150  | Intergenic         | CpG                     | -29326          | NM_004626    | 7481      | HS.108219       | NM_004626      | HPRD:04741        |
| A2780_CH390_inp_peak_94               | chr17 | 37023722  | 37024221  | Intergenic         | Intergenic              | -2141           | NR_073384    | 3927      | HS.741156       | NM_061648      | HPRD:04229        |
| A2780_CH390_inp_peak_120              | chr5  | 180615657 | 180616156 | Intergenic         | Intergenic              | 3002            | NR_108031    | 102577426 | HS.277359       | NR_108031      |                   |
| A2780_CH390_inp_peak_30               | chr1  | 228754749 | 228755248 | Intergenic         | CpG                     | -25396          | NR_037962    | 58480     | HS.647774       | NM_012205      | HPRD:06965        |
| A2780_CH390_inp_peak_126              | chr6  | 26286529  | 26287028  | Intergenic         | Intergenic              | -1051           | NM_003543    | 8365      | HS.591790       | NM_003543      | HPRD:11919        |
| A2780_CH390_inp_peak_78               | chr16 | 14379525  | 14380024  | Intergenic         | Intergenic              | -18050          | NR_030177    | 574455    |                 | NR_030177      | miRBase:MI0003137 |
| A2780_CH390_inp_peak_89               | chr17 | 8098997   | 80990486  | promoter-TSS (NR_0 | promoter-TSS (NR_039746 | -27             | NR_039746    | 100616406 |                 | NR_039746      |                   |
| A2780_CH390_inp_peak_151              | chr6  | 126101165 | 126101664 | promoter-TSS (NM   | promoter-TSS (NM_001195 | -893            | NM_001195    | 135112    | HS.171426       | NM_181782      | HPRD:14814        |
| A2780_CH390_inp_peak_119              | chr5  | 180615218 | 180615717 | Intergenic         | Intergenic              | 3441            | NR_108031    | 102577426 | HS.277359       | NR_108031      |                   |
| A2780_CH390_inp_peak_37               | chr1  | 228727613 | 22873262  | Intergenic         | CpG                     | -7532           | NR_037962    | 58480     | HS.647774       | NM_012205      | HPRD:06965        |
| A2780_CH390_inp_peak_156              | chr8  | 67025428  | 67025927  | Intergenic         | Intergenic              | -13601          | NM_184087    | 84575     | HS.85524        | NM_033058      | HPRD:05927        |
| A2780_CH390_inp_peak_129              | chr6  | 2653320   | 26533419  | Intergenic         | Intergenic              | -5403           | NM_006353    | 10473     | HS.236774       | NM_006353      |                   |
| A2780_CH390_inp_peak_85               | chr16 | 87417377  | 87417876  | promoter-TSS (NM   | promoter-TSS (NM_024733 | -227            | NM_024733    | 79791     | HS.567582       | NM_024733      |                   |
| A2780_CH390_inp_peak_56               | chr12 | 125411666 | 125412165 | Intergenic         | Intergenic              | 11822           | NR_049820    | 100847004 |                 | NR_049820      | miRBase:MI0018167 |
| A2780_CH390_inp_peak_8                | chr1  | 148754237 | 148754736 | intron (NR_104217  | intron (NR_104217       | -51529          | NM_001144    | 730262    |                 | NM_001144032   |                   |
| A2780_CH390_inp_peak_164              | chrX  | 61730814  | 61731313  | Intergenic         | Intergenic              | 840155          | NM_001012    | 139886    | HS.612782       | NM_001012968   | HPRD:12556        |
| A2780_CH390_inp_peak_149              | chr6  | 28920807  | 28921306  | Intergenic         | Intergenic              | 9495            | NR_103538    | 729583    | HS.453549       | NR_103538      |                   |
| A2780_CH390_inp_peak_154              | chr7  | 61083496  | 61083995  | Intergenic         | Intergenic              | 1680689         | NR_003952    | 643955    | HS.583308       | NR_003952      | ENSG00000185037   |
| A2780_CH390_inp_peak_20               | chr1  | 161500716 | 161501215 | Intergenic         | Intergenic              | 6929            | NM_002155    | 3310      | HS.654614       | NM_002155      | HPRD:00775        |
| A2780_CH390_inp_peak_25               | chr1  | 204475928 | 204476427 | Intergenic         | Intergenic              | -9330           | NM_001278    | 4194      | HS.497492       | NM_002393      | HPRD:04082        |
| A2780_CH390_inp_peak_146              | chr6  | 28831231  | 28831730  | promoter-TSS (NR   | promoter-TSS (NR_033379 | -26             | NR_033379    | 401242    | HS.448285       | NR_033379      | ENSG00000225595   |
| A2780_CH390_inp_peak_59               | chr13 | 31247866  | 31248365  | Intergenic         | Intergenic              | -39500          | NM_001204    | 241       | HS.507658       | NM_001629      | HPRD:04742        |
| A2780_CH390_inp_peak_142              | chr6  | 27758860  | 27759359  | Intergenic         | Intergenic              | 16600           | NM_003519    | 8340      | HS.137594       | NR_035119      | HPRD:11898        |
| A2780_CH390_inp_peak_29               | chr1  | 228752539 | 228753038 | Intergenic         | CpG                     | -27606          | NR_037962    | 58480     | HS.647774       | NM_012205      | HPRD:06965        |
| A2780_CH390_inp_peak_43               | chr10 | 22518243  | 22518742  | Intergenic         | Intergenic              | -19580          | NM_001199    | 340900    | HS.450519       | NM_001199938   | ENSG00000223601   |
| A2780_CH390_inp_peak_61               | chr14 | 21081717  | 21082216  | Intergenic         | Intergenic              | -22984          | NM_001024    | 493901    | HS.729466       | NM_001024822   | HPRD:18667        |
| A2780_CH390_inp_peak_51               | chr11 | 59333603  | 59334102  | Intergenic         | Intergenic              | 28779           | NR_036120    | 100422880 |                 | NR_036120      |                   |
| A2780_CH390_inp_peak_137              | chr6  | 27515288  | 27515787  | Intergenic         | Intergenic              | -74640          | NM_007149    | 7738      | HS.158174       | NM_007149      | HPRD:03785        |
| A2780_CH390_inp_peak_49               | chr11 | 59318270  | 59318769  | Intergenic         | Intergenic              | 36133           | NM_001004    | 390199    | HS.553757       | NM_001040711   | HPRD:17728        |
| A2780_CH390_inp_peak_107              | chr2  | 43037469  | 43037968  | Intergenic         | Intergenic              | -17967          | NM_012205    | 23498     | HS.368805       | NM_012205      | HPRD:05158        |
| A2780_CH390_inp_peak_124              | chr5  | 180645007 | 180645506 | Intergenic         | Intergenic              | 4377            | NR_039781    | 100616342 |                 | NR_039781      | miRBase:MI0017265 |
| A2780_CH390_inp_peak_87               | chr17 | 8023425   | 8023924   | TTS (NM_032580)    | TTS (NM_032580)         | -1440           | NM_001165    | 59344     | HS.232770       | NM_012628      | HPRD:06231        |
| A2780_CH390_inp_peak_57               | chr12 | 125412171 | 125412670 | Intergenic         | Intergenic              | 12327           | NR_049820    | 100847004 |                 | NR_049820      | miRBase:MI0018167 |
| A2780_CH390_inp_peak_41               | chr1  | 249167854 | 249168353 | Intergenic         | Intergenic              | -14788          | NM_001193    | 55657     | HS.377705       | NM_017865      | HPRD:07922        |
| A2780_CH390_inp_peak_83               | chr16 | 57333701  | 57334200  | Intergenic         | Intergenic              | -15366          | NM_015993    | 51090     | HS.632215       | NM_015993      | HPRD:11854        |
| A2780_CH390_inp_peak_76               | chr16 | 3200448   | 3200997   | Intergenic         | Intergenic              | 15613           | NM_001134    | 7760      | HS.115284       | NM_004220      | HPRD:12224        |
| A2780_CH390_inp_peak_7                | chr1  | 148598059 | 148598558 | intron (NR_104217  | intron (NR_104217       | 37461           | NR_104217    | 284565    | HS.523572       | NR_112638      | HPRD:14710        |
| A2780_CH390_inp_peak_79               | chr16 | 22206798  | 22207297  | Intergenic         | Intergenic              | -10545          | NM_013302    | 29904     | HS.498892       | NM_013302      |                   |
| A2780_CH390_inp_peak_39               | chr1  | 228777090 | 228777589 | Intergenic         | CpG                     | -3055           | NR_037962    | 58480     | HS.647774       | NM_012205      | HPRD:06965        |
| A2780_CH390_inp_peak_130              | chr6  | 26537559  | 26538058  | promoter-TSS (NM   | promoter-TSS (NM_006353 | -764            | NM_006353    | 10473     | HS.236774       | NM_006353      | HPRD:06965        |
| A2780_CH390_inp_peak_26               | chr1  | 228745782 | 228746281 | Intergenic         | CpG                     | -34363          | NR_037962    | 58480     | HS.647774       | NM_012205      | HPRD:06965        |
| A2780_CH390_inp_peak_80               | chr16 | 22308282  | 22308781  | promoter-TSS (NM   | promoter-TSS (NM_001258 | -165            | NM_018119    | 55718     | HS.460298       | NM_018119      | HPRD:15155        |
| A2780_CH390_inp_peak_55               | chr12 | 125406066 | 125406565 | Intergenic         | Intergenic              | 6222            | NR_049820    | 100847004 |                 | NR_049820      | miRBase:MI0018167 |
| A2780_CH390_inp_peak_138              | chr8  | 124169214 | 124169713 | Intergenic         | Intergenic              | -21824          | NM_007006    | 84985     | HS.379821       | NM_007006      | HPRD:17489        |
| A2780_CH390_inp_peak_158              | chr6  | 27550998  | 27551497  | Intergenic         | Intergenic              | -110350         | NM_007149    | 7738      | HS.158174       | NR_007149      | HPRD:03785        |
| A2780_CH390_inp_peak_17               | chr1  | 161438921 | 161439420 | Intergenic         | CpG                     | -36035          | NM_021642    | 21212     | HS.352642       | NM_021642      | HPRD:00906        |
| A2780_CH390_inp_peak_88               | chr17 | 8042001   | 8042500   | Intergenic         | Intergenic              | 6139            | NR_026943    | 102465532 |                 | NR_026943      |                   |
| A2780_CH390_inp_peak_58               | chr12 | 125424388 | 125424887 | Intergenic         | Intergenic              | 24444           | NR_049820    | 100847004 |                 | NR_049820      | miRBase:MI0018167 |
| A2780_CH390_inp_peak_102              | chr19 | 4723867   | 4724366   | promoter-TSS (NM   | promoter-TSS (NM_139155 | -261            | NM_139155    | 91039     | HS.515081       | NM_139155      | HPRD:07001        |
| A2780_CH390_inp_peak_10               | chr1  | 149298308 | 149298807 | Intergenic         | Intergenic              | 11106           | NR_111934    | 644634    | HS.723057       | NR_111934      |                   |
| A2780_CH390_inp_peak_15               | chr1  | 161420243 | 161420742 | Intergenic         | CpG                     | -54713          | NM_021642    | 21212     | HS.352642       | NM_021642      | HPRD:00906        |
| A2780_CH390_inp_peak_140              | chr6  | 27570117  | 27570616  | Intergenic         | Intergenic              | -91448          | NR_038293    | 100507173 | HS.635987       | NR_038292      |                   |
| A2780_CH390_inp_peak_132              | chr6  | 26568889  | 26569388  | Intergenic         | Intergenic              | -28033          | NM_013375    | 29777     | HS.254406       | NM_013375      | HPRD:16469        |
| A2780_CH390_inp_peak_134              | chr6  | 27198045  | 27198544  | Intergenic         | Intergenic              | -17208          | NM_005865    | 10279     | HS.274407       | NM_005865      | HPRD:06205        |
| A2780_CH390_inp_peak_144              | chr6  | 28180627  | 28181126  | Intergenic         | Intergenic              | 5831            | NR_002936    | 222699    | HS.161441       | NR_002936      | HPRD:05086        |
| A2780_CH390_inp_peak_23               | chr1  | 167683743 | 167684242 | Intergenic         | Intergenic              | -7195           | NR_024569    | 9019      | HS.493919       | NM_003393      | HPRD:05086        |
| A2780_CH390_inp_peak_71               | chr15 | 45492379  | 45492878  | intron (NM_138356  | intron (NM_138356       | 745             | NM_138356    | 90525     | HS.310399       | NM_138356      | HPRD:14272        |
| A2780_CH390_inp_peak_33               | chr1  | 228761434 | 228761933 | Intergenic         | CpG                     | -18711          | NR_037962    | 58480     | HS.647774       | NM_012205      | HPRD:06965        |
| A2780_CH390_inp_peak_67               | chr14 | 102783237 | 102783736 | promoter-TSS (NM   | promoter-TSS (NM_001262 | -228            | NM_001262    | 55778     | HS.743359       | NM_018335      | HPRD:18532        |
| A2780_CH390_inp_peak_109              | chr2  | 157257103 | 157257602 | Intergenic         | Intergenic              | -34613          | NM_010883    | 2820      | HS.512382       | NM_008408      | HPRD:00715        |
| A2780_CH390_inp_peak_65               | chr14 | 50329197  | 50329696  | Intergenic         | Intergenic              | -9907           | NM_004713    | 9147      | HS.655964       | NM_004713      | HPRD:08494        |
| A2780_CH390_inp_peak_112              | chr21 | 18826807  | 18827306  | Intergenic         | Intergenic              | 15848           | NR_037585    | 100505929 | HS.46707        | NM_00015521    | ENSG00000232560   |
| A2780_CH390_inp_peak_12               | chr1  | 153643510 | 153644009 | promoter-TSS (NM   | promoter-TSS (NM_004515 | -255            | NM_004515    | 3608      | HS.75117        | NM_004515      | HPRD:04419        |
| A2780_CH390_inp_peak_100              | chr18 | 10223     | 10722     | Intergenic         | (CCCTAA)nSimple_repeat  | -1603           | NR_110795    | 102723376 | HS.606852       | NR_110795      | </                |



|                           |       |           |           |                        |                              |         |            |           |           |              |                   |
|---------------------------|-------|-----------|-----------|------------------------|------------------------------|---------|------------|-----------|-----------|--------------|-------------------|
| A2780_CHC390_inp_peak_133 | chr6  | 26766250  | 26766749  | Intergenic             | tRNA-Met tRNA tRNA           | -106519 | NM_001242  | 79692     | Hs.126280 | NM_024639    |                   |
| A2780_CHC390_inp_peak_72  | chr15 | 45493116  | 45493615  | promoter-TSS (NM)      | promoter-TSS (NM_138356)     | 8       | NM_138356  | 90525     | Hs.310399 | NM_138356    | HPRD:14272        |
| A2780_CHC390_inp_peak_108 | chr2  | 89875095  | 89875594  | Intergenic             | [GAATG]n Satellite Satellite | 763460  | NR_039635  | 100616399 |           | NR_039635    | miRBase:MI0016776 |
| A2780_CHC390_inp_peak_121 | chr5  | 180618471 | 180618970 | intron (NR_108031)     | CpG-21583                    | 188     | NR_108031  | 102577426 | Hs.277359 | NR_108031    |                   |
| A2780_CHC390_inp_peak_153 | chr6  | 157731472 | 157731971 | intron (NM_018452)     | intron (NM_018452, intron    | 13570   | NM_018452  | 729515    | Hs.157212 | NM_018452    | ENSG00000215712   |
| A2780_CHC390_inp_peak_22  | chr1  | 161591257 | 161591756 | Intergenic             | tRNA-Asn-AAC tRNA tRNA       | 9331    | NM_001271  | 2215      | Hs.372679 | NM_000570    | HPRD:09951        |
| A2780_CHC390_inp_peak_42  | chr1  | 249168289 | 249168788 | Intergenic             | Intergenic                   | -15223  | NM_001193  | 55657     | Hs.377705 | NM_017865    | HPRD:07922        |
| A2780_CHC390_inp_peak_54  | chr12 | 98897084  | 98897583  | intron (NR_038383)     | tRNA-Asp-GAY tRNA tRNA       | 300     | NR_038383  | 643770    | Hs.129589 | NR_038383    | ENSG00000245017   |
| A2780_CHC390_inp_peak_159 | chr8  | 142502374 | 142502873 | intron (NR_102363)     | intron (NR_102363, intron    | 14707   | NM_207414  | 389690    | Hs.689547 | NM_207414    | HPRD:13480        |
| A2780_CHC390_inp_peak_32  | chr1  | 228759194 | 228759693 | Intergenic             | CpG                          | -20951  | NR_037962  | 58480     | Hs.647774 | NM_021205    | HPRD:06965        |
| A2780_CHC390_inp_peak_106 | chr2  | 27273466  | 27273965  | promoter-TSS (NM)      | promoter-TSS (NM_02183)      | -583    | NR_046730  | 100874031 | Hs.132725 | NR_046730    |                   |
| A2780_CHC390_inp_peak_136 | chr6  | 27487068  | 27487567  | Intergenic             | tRNA-Gln-CAG tRNA tRNA       | -46420  | NM_007149  | 7738      | Hs.158174 | NM_007149    | HPRD:03785        |
| A2780_CHC390_inp_peak_50  | chr11 | 59327612  | 59328111  | Intergenic             | tRNA-Lys-AAA tRNA tRNA       | 34770   | NR_036120  | 100422880 |           | NR_036120    |                   |
| A2780_CHC390_inp_peak_157 | chr8  | 96281633  | 96282132  | promoter-TSS (NM)      | promoter-TSS (NM_177965)     | -420    | NM_177965  | 157657    | Hs.548157 | NM_177965    | HPRD:14104        |
| A2780_CHC390_inp_peak_81  | chr16 | 22309615  | 22310114  | intron (NM_001258)     | MIR SINE MIR                 | 1168    | NM_001258  | 55718     | Hs.460298 | NM_018119    | HPRD:15155        |
| A2780_CHC390_inp_peak_14  | chr1  | 161412912 | 161413411 | Intergenic             | CpG                          | -62044  | NM_021642  | 2212      | Hs.352642 | NM_021642    | HPRD:00906        |
| A2780_CHC390_inp_peak_73  | chr15 | 79152706  | 79153205  | Intergenic             | tRNA-Lys-AAG tRNA tRNA       | -12168  | NM_001265  | 10933     | Hs.374503 | NM_006791    | HPRD:09532        |
| A2780_CHC390_inp_peak_16  | chr1  | 161424123 | 161424622 | Intergenic             | CpG                          | -50833  | NM_021642  | 2212      | Hs.352642 | NM_021642    | HPRD:00906        |
| A2780_CHC390_inp_peak_99  | chr17 | 80452381  | 80452880  | Intergenic             | tRNA-Met-t tRNA tRNA         | -24964  | NM_004514  | 3607      | Hs.591140 | NM_004514    | HPRD:00982        |
| A2780_CHC390_inp_peak_2   | chr1  | 145395290 | 145395789 | intron (NM_001039)     | tRNA-Lys-AAG tRNA tRNA       | -17652  | NM_213653  | 148738    | Hs.632436 | NM_145277    | HPRD:10521        |
| A2780_CHC390_inp_peak_77  | chr16 | 3202725   | 32028224  | Intergenic             | Intergenic                   | 17840   | NM_001134  | 7760      | Hs.115284 | NM_004220    | HPRD:12224        |
| A2780_CHC390_inp_peak_90  | chr17 | 8125325   | 8125824   | intron (NR_026951)     | tRNA-Asp-GAY tRNA tRNA       | 1787    | NR_026951  | 284029    | Hs.121692 | NM_173621    | HPRD:08755        |
| A2780_CHC390_inp_peak_27  | chr1  | 228748015 | 228748514 | Intergenic             | CpG                          | -32130  | NR_037962  | 58480     | Hs.647774 | NM_021205    | HPRD:06965        |
| A2780_CHC390_inp_peak_139 | chr6  | 27560370  | 27560869  | Intergenic             | tRNA-Met-t tRNA tRNA         | -101195 | NR_038293  | 100507173 | Hs.635987 | NR_038292    |                   |
| A2780_CHC390_inp_peak_92  | chr17 | 8130052   | 8130551   | non-coding (NR_046431) | non-coding (NR_046431, e     | -2940   | NR_026951  | 284029    | Hs.121692 | NM_173621    | HPRD:08755        |
| A2780_CHC390_inp_peak_19  | chr1  | 161499915 | 161500414 | Intergenic             | tRNA-Leu-CTG tRNA tRNA       | 6128    | NM_002155  | 3310      | Hs.654614 | NM_002155    | HPRD:00775        |
| A2780_CHC390_inp_peak_115 | chr4  | 49325292  | 49325791  | Intergenic             | ACRO1 Satellite acro         | 336882  | NM_001286  | 80157     | Hs.479703 | NM_025087    | HPRD:08638        |
| A2780_CHC390_inp_peak_11  | chr1  | 149679981 | 149680480 | Intergenic             | tRNA-Gly-GGG tRNA tRNA       | -74020  | NM_000566  | 2209      | Hs.77424  | NM_000566    | HPRD:00904        |
| A2780_CHC390_inp_peak_141 | chr6  | 27573239  | 27573738  | Intergenic             | tRNA-Leu-TTG tRNA tRNA       | -88326  | NR_038293  | 100507173 | Hs.635987 | NR_038292    |                   |
| A2780_CHC390_inp_peak_125 | chr5  | 180648756 | 180649255 | TTS (NR_039781)        | TTS (NR_039781)              | 628     | NR_039781  | 100616342 |           | NR_039781    | miRBase:MI0017265 |
| A2780_CHC390_inp_peak_28  | chr1  | 228750289 | 228750788 | Intergenic             | CpG                          | -29856  | NR_037962  | 58480     | Hs.647774 | NM_021205    | HPRD:06965        |
| A2780_CHC390_inp_peak_113 | chr3  | 45730280  | 45730779  | promoter-TSS (NM)      | promoter-TSS (NM_014016)     | -155    | NR_033947  | 644714    | Hs.712889 | NR_033947    |                   |
| A2780_CHC390_inp_peak_13  | chr1  | 161397648 | 161398147 | Intergenic             | tRNA-Asn-AAC tRNA tRNA       | -60224  | NM_0010134 | 257177    | Hs.534593 | NM_001013625 | HPRD:13257        |

**Supplementary Table 4**

| PeakID (cmd=annotatePeaks.pl HCT_CHC388 | Chr          | Start     | End       | Annotation                            | Detailed Annotation                   | Distance to TSS | Nearest PromoterID | Entrez ID | Nearest Unigene | Nearest Refseq    | Nearest Ensembl |
|-----------------------------------------|--------------|-----------|-----------|---------------------------------------|---------------------------------------|-----------------|--------------------|-----------|-----------------|-------------------|-----------------|
| HCT_CHC388_inpeak_40                    | chr19        | 7515614   | 7516113   | intron (NM_001130955, intron 5 of 19) | intron (NM_001130955, intron 5 of 19) | 11289           | NM_001130955       | 23370     | Hs.465761       | NM_015318         | HPRD:12479      |
| HCT_CHC388_inpeak_11                    | chr1         | 161438942 | 161439441 | Intergenic                            | CpG                                   | -36014          | NM_021642          | 22122     | Hs.352642       | NM_021642         | HPRD:00906      |
| HCT_CHC388_inpeak_53                    | chr6         | 28918606  | 28919105  | Intergenic                            | IRNA-Lys-AAA [RNA]   RNA              | 7294            | NR_023538          | 729583    | Hs.453549       | NR_103538         |                 |
| HCT_CHC388_inpeak_49                    | chr6         | 26532914  | 26533413  | Intergenic                            | IRNA-Thr-ACY [RNA]   RNA              | -5409           | NM_006353          | 10473     | Hs.236774       | NM_006353         |                 |
| HCT_CHC388_inpeak_39                    | chr17        | 66015773  | 66016272  | Intergenic                            | IRNA-Arg-AGG [RNA]   RNA              | -15826          | NM_002266          | 3838      | Hs.594238       | NM_002266         | HPRD:02818      |
| HCT_CHC388_inpeak_50                    | chr6         | 26745032  | 26745531  | Intergenic                            | IRNA-Ile-ATT [RNA]   RNA              | -85301          | NM_001242799       | 79692     | Hs.126280       | NM_024639         |                 |
| HCT_CHC388_inpeak_47                    | chr5         | 180649167 | 180649666 | promoter-TSS (NM_201627)              | promoter-TSS (NM_201627)              | 217             | NR_039781          | 100616342 | NR_039781       | miRBase:MI0017265 |                 |
| HCT_CHC388_inpeak_24                    | chr11        | 66188984  | 66189483  | intron (NM_178864, intron 1 of 7)     | CpG                                   | 758             | NM_178864          | 266743    | Hs.256036       | NM_178864         | HPRD:12260      |
| HCT_CHC388_inpeak_32                    | chr16        | 22308271  | 22308770  | promoter-TSS (NM_001258034)           | promoter-TSS (NM_001258034)           | -176            | NM_018119          | 55718     | Hs.460298       | NM_018119         | HPRD:15155      |
| HCT_CHC388_inpeak_17                    | chr10        | 22518192  | 22518691  | Intergenic                            | IRNA-Asn-AAC [RNA]   RNA              | -19529          | NM_001199938       | 340900    | Hs.450519       | NM_001199938      | ENSG00000223601 |
| HCT_CHC388_inpeak_4                     | chr1         | 145395302 | 145395801 | intron (NM_001039703, intron 68 of 8) | IRNA-Lys-AAG [RNA]   RNA              | -17640          | NM_213653          | 148738    | Hs.632436       | NM_145277         | HPRD:10521      |
| HCT_CHC388_inpeak_8                     | chr1         | 161424142 | 161424641 | Intergenic                            | CpG                                   | -50814          | NM_021642          | 2212      | Hs.352642       | NM_021642         | HPRD:00906      |
| HCT_CHC388_inpeak_51                    | chr6         | 27300489  | 27300988  | Intergenic                            | Intergenic                            | 8198            | NR_045612          | 387316    | Hs.326753       | NM_032030         |                 |
| HCT_CHC388_inpeak_12                    | chr1         | 204475438 | 204475937 | Intergenic                            | IRNA-Lys-AAA [RNA]   RNA              | -9820           | NM_001278518       | 4194      | Hs.497492       | NM_02393          | HPRD:04082      |
| HCT_CHC388_inpeak_2                     | chr1         | 16872192  | 16872691  | Intergenic                            | IRNA-Gly-GGG [RNA]   RNA              | -2968           | NR_037446          | 100500876 | NR_037446       | miRBase:MI0016076 |                 |
| HCT_CHC388_inpeak_29                    | chr15        | 454928360 | 454928799 | intron (NM_138356, intron 1 of 7)     | IRNA-His-CAY [RNA]   RNA              | 744             | NM_138356          | 90525     | Hs.310399       | NR_138356         | HPRD:14272      |
| HCT_CHC388_inpeak_52                    | chr6         | 28715402  | 28715901  | Intergenic                            | MER1A [DNA]   hAT-Charlie             | 115803          | NR_033379          | 401242    | Hs.448285       | NR_033379         | ENSG00000225595 |
| HCT_CHC388_inpeak_30                    | chr16        | 3202718   | 3203217   | Intergenic                            | IRNA-Arg-AGG [RNA]   RNA              | 17833           | NM_001134655       | 7760      | Hs.115284       | NM_004220         | HPRD:12224      |
| HCT_CHC388_inpeak_36                    | chr17        | 8023385   | 8023884   | TTS (NM_032580)                       | TTS (NM_032580)                       | -1400           | NM_001165960       | 59344     | Hs.232770       | NM_021628         | HPRD:06231      |
| HCT_CHC388_inpeak_61                    | chrLin_g1000 | 102219    | 102719    | NA                                    | BSR/Beta [Satellite]   Satellite      | NA              | NA                 |           |                 |                   |                 |
| HCT_CHC388_inpeak_57                    | chr9         | 35657610  | 35658109  | promoter-TSS (NM_001195201)           | promoter-TSS (NM_001195201)           | 156             | NR_003051          | 6023      | Hs.587502       | NR_003051         | ENSG00000269900 |
| HCT_CHC388_inpeak_48                    | chr6         | 26521220  | 26521719  | promoter-TSS (NR_026790)              | promoter-TSS (NR_026790)              | -465            | NR_026790          | 493812    | Hs.272939       | NR_026790         | ENSG00000228223 |
| HCT_CHC388_inpeak_3                     | chr1         | 94312926  | 94313425  | promoter-TSS (NM_001261408)           | promoter-TSS (NM_001261408)           | -469            | NM_001261408       | 8412      | Hs.36958        | NR_003567         | HPRD:05268      |
| HCT_CHC388_inpeak_14                    | chr1         | 228752529 | 228753028 | Intergenic                            | CpG                                   | -27616          | NR_037962          | 58480     | Hs.647774       | NM_021205         | HPRD:06965      |
| HCT_CHC388_inpeak_9                     | chr1         | 161427668 | 161428167 | Intergenic                            | CpG                                   | -47288          | NM_021642          | 2212      | Hs.352642       | NM_021642         | HPRD:00906      |
| HCT_CHC388_inpeak_16                    | chr1         | 249167837 | 249168336 | Intergenic                            | IRNA-Leu-TTG [RNA]   RNA              | -14771          | NM_001193328       | 55657     | Hs.377705       | NM_017865         | HPRD:07922      |
| HCT_CHC388_inpeak_25                    | chr12        | 125424288 | 125424787 | Intergenic                            | IRNA-Ala-GCG [RNA]   RNA              | 24444           | NR_049820          | 10087004  | NR_049820       | miRBase:MI0018167 |                 |
| HCT_CHC388_inpeak_35                    | chr16        | 57333654  | 57334153  | Intergenic                            | IRNA-Leu-CTG [RNA]   RNA              | -15319          | NM_015993          | 51090     | Hs.632215       | NM_015993         | HPRD:11854      |
| HCT_CHC388_inpeak_45                    | chr5         | 180618493 | 180618992 | non-coding (NR_108031, exon 1 of 2)   | non-coding (NR_108031, exon 1 of 2)   | 166             | NR_108031          | 102577426 | Hs.277359       | NR_108031         |                 |
| HCT_CHC388_inpeak_42                    | chr20        | 26318197  | 26318696  | Intergenic                            | ALR/Alpha [Satellite]   cent          | -128577         | NR_040095          | 284801    | Hs.370699       | NR_040095         | ENSG00000227195 |
| HCT_CHC388_inpeak_55                    | chr7         | 149388036 | 149388535 | Intergenic                            | IRNA-Cys-TGY [RNA]   RNA              | -23817          | NM_032534          | 84626     | Hs.299560       | NM_032534         | HPRD:11167      |
| HCT_CHC388_inpeak_38                    | chr17        | 29870950  | 29871449  | Intergenic                            | CpG                                   | -9816           | NR_029710          | 406968    | NR_029710       | miRBase:MI0000487 |                 |
| HCT_CHC388_inpeak_10                    | chr1         | 161431537 | 161432036 | Intergenic                            | CpG                                   | -43419          | NM_021642          | 2212      | Hs.352642       | NM_021642         | HPRD:00906      |
| HCT_CHC388_inpeak_46                    | chr5         | 180645066 | 180645565 | Intergenic                            | IRNA-Val-GTY [RNA]   RNA              | 4318            | NR_039781          | 100616342 | NR_039781       | miRBase:MI0017265 |                 |
| HCT_CHC388_inpeak_15                    | chr1         | 228781620 | 228782119 | intron (NR_037962, intron 1 of 2)     | CpG-2319                              | 1212            | NR_002834          | 574029    | Hs.647777       | NR_002834         |                 |
| HCT_CHC388_inpeak_6                     | chr1         | 15364354  | 153644033 | promoter-TSS (NM_004515)              | promoter-TSS (NM_004515)              | -279            | NM_004515          | 3608      | Hs.75117        | NM_004515         | HPRD:04419      |
| HCT_CHC388_inpeak_54                    | chr6         | 52860267  | 52860766  | promoter-TSS (NM_001512)              | promoter-TSS (NM_001512)              | -338            | NM_001512          | 2941      | Hs.485557       | NM_001512         | HPRD:06899      |
| HCT_CHC388_inpeak_7                     | chr1         | 161416766 | 161417265 | Intergenic                            | CpG                                   | -58190          | NM_021642          | 2212      | Hs.352642       | NM_021642         | HPRD:00906      |
| HCT_CHC388_inpeak_27                    | chr14        | 21078094  | 21078593  | Intergenic                            | IRNA-Leu-CTY [RNA]   RNA              | -19361          | NM_001024822       | 493901    | Hs.729466       | NM_001024822      | HPRD:18667      |
| HCT_CHC388_inpeak_5                     | chr1         | 145397597 | 145398096 | intron (NM_001039703, intron 68 of 8) | intron (NM_001039703, intron 68 of 8) | -15345          | NM_213653          | 148738    | Hs.632436       | NM_145277         | HPRD:10521      |
| HCT_CHC388_inpeak_28                    | chr14        | 50053071  | 50053570  | promoter-TSS (NM_001032)              | promoter-TSS (NM_001032)              | -186            | NM_001030001       | 6235      | Hs.156367       | NM_001032         | HPRD:04698      |
| HCT_CHC388_inpeak_23                    | chr11        | 66115327  | 66115826  | promoter-TSS (NM_006876)              | promoter-TSS (NM_006876)              | -415            | NM_006876          | 11041     | Hs.8526         | NM_006876         | HPRD:09270      |
| HCT_CHC388_inpeak_31                    | chr16        | 14379536  | 14380035  | Intergenic                            | IRNA-Thr-ACG [RNA]   RNA              | -18039          | NR_030177          | 574455    | NR_030177       | miRBase:MI0003137 |                 |
| HCT_CHC388_inpeak_26                    | chr13        | 45491839  | 45492338  | Intergenic                            | IRNA-Glu-GAG [RNA]   RNA              | 71525           | NM_012345          | 26747     | Hs.525006       | NM_012345         | HPRD:05073      |
| HCT_CHC388_inpeak_13                    | chr1         | 204476034 | 204476533 | Intergenic                            | Intergenic                            | -9224           | NM_001278518       | 4194      | Hs.497492       | NM_02393          | HPRD:04082      |
| HCT_CHC388_inpeak_37                    | chr17        | 8089963   | 8090462   | promoter-TSS (NR_039746)              | promoter-TSS (NR_039746)              | -51             | NR_039746          | 100616406 | NR_039746       |                   |                 |

Supplementary Table 5

| PeakID (cmd=annotatePeaks.pl/hon) | Chr   | Start     | End       | Annotation                     | Detailed Annotation         | Distance to TSS | Nearest Prom | Entrez ID | Nearest Unigene | Nearest Refseq    | Nearest Ensembl |
|-----------------------------------|-------|-----------|-----------|--------------------------------|-----------------------------|-----------------|--------------|-----------|-----------------|-------------------|-----------------|
| P493_merge_peak_36                | chr1  | 153643516 | 153644058 | promoter-TSS (NM_004515)       | promoter-TSS (NM_004515)    | -283            | NM_004515    | 3608      | Hs.75117        | NM_004515         | HPRD:04419      |
| P493_merge_peak_128               | chr13 | 45491842  | 45492323  | Intergenic                     | tRNA-Glu-GAG [tRNA] tRNA    | 71531           | NM_012345    | 26747     | Hs.525006       | NM_012345         | HPRD:05073      |
| P493_merge_peak_227               | chr19 | 33665974  | 33668293  | Intergenic                     | CpG                         | -17656          | NM_002333    | 4037      | Hs.515340       | NM_002333         |                 |
| P493_merge_peak_158               | chr15 | 79152805  | 79153201  | Intergenic                     | Intergenic                  | -12120          | NM_001265    | 10933     | Hs.374503       | NM_006791         | HPRD:09532      |
| P493_merge_peak_296               | chr5  | 180633689 | 180634170 | Intergenic                     | tRNA-Ala-GCG [tRNA] tRNA    | -1636           | NM_203293    | 81786     | Hs.487412       | NM_003342         | HPRD:11648      |
| P493_merge_peak_122               | chr12 | 125411645 | 125412634 | Intergenic                     | Intergenic                  | 12046           | NR_049820    | 100847004 | NR_049820       | miRBase:MI0018167 |                 |
| P493_merge_peak_253               | chr2  | 43037528  | 43038032  | Intergenic                     | Intergenic                  | -18029          | NM_012205    | 23498     | Hs.368805       | NM_012205         | HPRD:05158      |
| P493_merge_peak_181               | chr16 | 57333716  | 57334658  | Intergenic                     | Alu[SINE] Alu               | -15603          | NM_015993    | 51090     | Hs.632215       | NM_015993         | HPRD:11854      |
| P493_merge_peak_149               | chr14 | 102783224 | 102783719 | promoter-TSS (NM_004515)       | promoter-TSS (NM_001267827) | -243            | NM_001267    | 55778     | Hs.743359       | NM_018335         | HPRD:18532      |
| P493_merge_peak_205               | chr17 | 37310518  | 37310974  | Intergenic                     | tRNA-Cys-TGY [tRNA] tRNA    | -2844           | NM_020405    | 57125     | Hs.125036       | NM_020405         | HPRD:08439      |
| P493_merge_peak_152               | chr15 | 40885853  | 40886292  | promoter-TSS (NM_144508)       | promoter-TSS (NM_144508)    | -375            | NM_170589    | 57082     | Hs.181855       | NM_144508         | HPRD:10634      |
| P493_merge_peak_178               | chr16 | 22206816  | 22207265  | Intergenic                     | tRNA-Leu-CTA [tRNA] tRNA    | -10552          | NM_013302    | 29904     | Hs.498892       | NM_013302         |                 |
| P493_merge_peak_143               | chr14 | 23398734  | 23399232  | promoter-TSS (NM_001282953)    | promoter-TSS (NM_001282953) | 165             | NR_110002    | 101926933 | Hs.727321       | NR_110002         | ENSG00000257285 |
| P493_merge_peak_245               | chr19 | 50626161  | 50626629  | promoter-TSS (NR_024228.2)     | promoter-TSS (NR_024228.2)  | 56              | NR_024225    | 100169954 | Hs.723094       | NR_024225         |                 |
| P493_merge_peak_334               | chr6  | 27144750  | 27145223  | Intergenic                     | Intergenic                  | 29581           | NR_036096    | 100422934 | NR_036096       | miRBase:MI0014167 |                 |
| P493_merge_peak_390               | chr6  | 28625795  | 28626259  | Intergenic                     | tRNA-Ala-GCY [tRNA] tRNA    | -70915          | NM_052923    | 114821    | Hs.176980       | NM_052923         | HPRD:11720      |
| P493_merge_peak_445               | chr8  | 96281657  | 96282148  | promoter-TSS (NM_177965)       | promoter-TSS (NM_177965)    | -440            | NM_177965    | 157657    | Hs.548157       | NM_177965         | HPRD:14104      |
| P493_merge_peak_192               | chr17 | 8089532   | 8091351   | TTS (NR_039746)                | TTS (NR_039746)             | 178             | NR_039746    | 100616406 | NR_039746       | NR_039746         |                 |
| P493_merge_peak_238               | chr19 | 50595588  | 50596020  | promoter-TSS (NR_024214.2)     | promoter-TSS (NR_024214.2)  | 62              | NR_024225    | 100169954 | Hs.723094       | NR_024225         |                 |
| P493_merge_peak_255               | chr2  | 70475812  | 70476361  | promoter-TSS (NM_020307)       | promoter-TSS (NM_020307)    | -307            | NM_021773    | 7072      | Hs.413123       | NM_022037         | HPRD:04626      |
| P493_merge_peak_88                | chr1  | 24916870  | 24916879  | Intergenic                     | Intergenic                  | -15015          | NM_001193    | 55657     | Hs.377705       | NM_017865         | HPRD:07922      |
| P493_merge_peak_96                | chr10 | 69524083  | 69524533  | Intergenic                     | tRNA-Ser-TCA [tRNA] tRNA    | -68359          | NM_013266    | 29119     | Hs.21375        | NM_013266         | HPRD:09639      |
| P493_merge_peak_252               | chr2  | 27273489  | 27274377  | promoter-TSS (NM_021831)       | promoter-TSS (NM_021831)    | -558            | NM_021831    | 60509     | Hs.138207       | NM_021831         | HPRD:07968      |
| P493_merge_peak_16                | chr1  | 94312957  | 94313421  | promoter-TSS (NM_001261408)    | promoter-TSS (NM_001261408) | -483            | NM_0012614   | 8412      | Hs.36958        | NM_003567         | HPRD:05268      |
| P493_merge_peak_31                | chr1  | 14929441  | 149294893 | Intergenic                     | Intergenic                  | 7166            | NR_111934    | 646634    | Hs.723057       | NR_111934         |                 |
| P493_merge_peak_295               | chr5  | 180618442 | 180618938 | intron (NR_108031, intron 1)   | CpG-21583                   | 218             | NR_108031    | 102577426 | Hs.727035       | NR_108031         |                 |
| P493_merge_peak_206               | chr17 | 47269734  | 47270203  | Intergenic                     | CpG                         | 16775           | NM_031498    | 2793      | Hs.181781       | NR_031498         | HPRD:06792      |
| P493_merge_peak_410               | chr6  | 28908659  | 28909635  | Intergenic                     | Intergenic                  | -2414           | NR_103538    | 729583    | Hs.453549       | NR_103538         |                 |
| P493_merge_peak_270               | chr3  | 45730186  | 45730748  | promoter-TSS (NM_014016)       | promoter-TSS (NM_014016)    | -93             | NR_039474    | 644714    | Hs.712889       | NR_039474         |                 |
| P493_merge_peak_161               | chr16 | 686506    | 686991    | promoter-TSS (NM_032366)       | promoter-TSS (NM_032366)    | -382            | NR_109979    | 84326     | Hs.239500       | NM_032366         | HPRD:17482      |
| P493_merge_peak_362               | chr6  | 27560355  | 27560848  | Intergenic                     | tRNA-Met-[tRNA] tRNA        | -101213         | NR_038293    | 100507173 | Hs.635987       | NR_038292         |                 |
| P493_merge_peak_413               | chr6  | 28918671  | 28919089  | Intergenic                     | Intergenic                  | 7319            | NR_103538    | 729583    | Hs.453549       | NR_103538         |                 |
| P493_merge_peak_104               | chr11 | 59333602  | 59334077  | Intergenic                     | Intergenic                  | 28792           | NR_036120    | 100422880 | NR_036120       |                   |                 |
| P493_merge_peak_108               | chr11 | 66115422  | 66115915  | promoter-TSS (NM_006876)       | promoter-TSS (NM_006876)    | -507            | NM_006876    | 11041     | Hs.8526         | NM_006876         | HPRD:09270      |
| P493_merge_peak_103               | chr11 | 59327622  | 59328058  | Intergenic                     | tRNA-Lys-AAA [tRNA] tRNA    | 34791           | NR_036120    | 100422880 | NR_036120       |                   |                 |
| P493_merge_peak_220               | chr19 | 1383100   | 1383892   | promoter-TSS (NM_024407)       | promoter-TSS (NM_024407)    | -387            | NM_024407    | 374291    | Hs.211914       | NM_024407         |                 |
| P493_merge_peak_76                | chr1  | 228757006 | 228757419 | Intergenic                     | CpG                         | -23182          | NR_037962    | 58480     | Hs.647774       | NM_021205         | HPRD:06965      |
| P493_merge_peak_318               | chr6  | 26568936  | 26569357  | Intergenic                     | tRNA-Tyr-TAC [tRNA] tRNA    | -28025          | NM_013375    | 29777     | Hs.254406       | NM_013375         | HPRD:16469      |
| P493_merge_peak_162               | chr16 | 3200499   | 3200991   | Intergenic                     | tRNA-Arg-CGG [tRNA] tRNA    | 15611           | NM_001134    | 7760      | Hs.115284       | NM_004220         | HPRD:12224      |
| P493_merge_peak_61                | chr1  | 161499935 | 161500380 | Intergenic                     | tRNA-Leu-CTG [tRNA] tRNA    | 6121            | NM_002155    | 3310      | Hs.654614       | NM_002155         | HPRD:00775      |
| P493_merge_peak_154               | chr15 | 45492379  | 45492864  | intron (NM_138356, intron 1)   | tRNA-His-CAY [tRNA] tRNA    | 752             | NM_138356    | 90525     | Hs.310399       | NM_138356         | HPRD:14272      |
| P493_merge_peak_132               | chr14 | 21078119  | 21078581  | Intergenic                     | tRNA-Leu-CTY [tRNA] tRNA    | -19368          | NM_001024    | 493901    | Hs.729466       | NM_001024822      | HPRD:18667      |
| P493_merge_peak_52                | chr1  | 161424116 | 161424862 | Intergenic                     | CpG                         | -50716          | NM_021642    | 2212      | Hs.352642       | NM_021642         | HPRD:09096      |
| P493_merge_peak_129               | chr13 | 95201718  | 95202162  | Intergenic                     | CpG                         | 46576           | NM_014305    | 23483     | Hs.12393        | NM_014305         | HPRD:15494      |
| P493_merge_peak_409               | chr6  | 28863777  | 28864288  | promoter-TSS (NR_104117)       | promoter-TSS (NR_104117)    | -270            | NR_104117    | 414760    | Hs.211005       | NR_104117         |                 |
| P493_merge_peak_179               | chr16 | 14379592  | 14380243  | Intergenic                     | Intergenic                  | -17907          | NR_030177    | 574455    | NR_030177       | miRBase:MI0003137 |                 |
| P493_merge_peak_214               | chr17 | 80452246  | 80452841  | Intergenic                     | Intergenic                  | -25051          | NM_004514    | 3607      | Hs.591140       | NM_004514         | HPRD:00982      |
| P493_merge_peak_160               | chr15 | 89878116  | 89878669  | promoter-TSS (NM_001126131)    | promoter-TSS (NM_001126131) | -366            | NM_002693    | 5428      | Hs.706868       | NM_002693         | HPRD:01438      |
| P493_merge_peak_117               | chr12 | 98897127  | 98897556  | intron (NR_038383, intron 1)   | tRNA-Asp-GAY [tRNA] tRNA    | 292             | NR_038383    | 643770    | Hs.129589       | NR_038383         | ENSG00000245017 |
| P493_merge_peak_19                | chr1  | 145396654 | 145397116 | intron (NM_00103970, intron 1) | tRNA-His-CAY [tRNA] tRNA    | -16306          | NM_213653    | 148738    | Hs.632436       | NM_145277         | HPRD:10521      |
| P493_merge_peak_259               | chr2  | 157257086 | 157257886 | Intergenic                     | Intergenic                  | -34479          | NM_001083    | 2820      | Hs.512382       | NM_004048         | HPRD:00715      |
| P493_merge_peak_100               | chr11 | 59317867  | 59319478  | Intergenic                     | Intergenic                  | 36286           | NM_001004    | 390199    | Hs.553757       | NM_001004711      | HPRD:17728      |
| P493_merge_peak_391               | chr6  | 28641392  | 28641847  | Intergenic                     | tRNA-Ala-GCG [tRNA] tRNA    | -86507          | NM_052923    | 114821    | Hs.176980       | NM_052923         | HPRD:11720      |
| P493_merge_peak_83                | chr1  | 228772627 | 228773107 | Intergenic                     | CpG                         | -7527           | NR_037962    | 58480     | Hs.647774       | NM_021205         | HPRD:06965      |
| P493_merge_peak_414               | chr6  | 28920851  | 28921268  | Intergenic                     | tRNA-Met-[tRNA] tRNA        | 9498            | NR_103538    | 729583    | Hs.453549       | NR_103538         |                 |
| P493_merge_peak_312               | chr6  | 26532919  | 26533401  | Intergenic                     | tRNA-Thr-ACY [tRNA] tRNA    | -5412           | NM_006353    | 10473     | Hs.236774       | NM_006353         |                 |
| P493_merge_peak_153               | chr15 | 45490584  | 45491050  | intron (NM_138356, intron 1)   | tRNA-His-CAY [tRNA] tRNA    | 2556            | NM_138356    | 90525     | Hs.310399       | NR_138356         | HPRD:14272      |
| P493_merge_peak_294               | chr5  | 180614517 | 180616117 | Intergenic                     | Alu[SINE] Alu               | 3591            | NR_108031    | 102577426 | Hs.277359       | NR_108031         |                 |
| P493_merge_peak_246               | chr19 | 50631492  | 50631927  | promoter-TSS (NR_024228)       | promoter-TSS (NR_024228)    | 70              | NR_024223    | 100169952 | Hs.723094       | NR_024223         |                 |
| P493_merge_peak_124               | chr13 | 31247894  | 31248372  | Intergenic                     | tRNA-Asn-AAC [tRNA] tRNA    | -39482          | NM_001204    | 241       | Hs.507658       | NM_001629         | HPRD:04742      |
| P493_merge_peak_443               | chr8  | 67025446  | 67025914  | Intergenic                     | tRNA-Tyr-TAC [tRNA] tRNA    | -13598          | NR_184087    | 84675     | Hs.85524        | NR_033058         | HPRD:05927      |
| P493_merge_peak_375               | chr6  | 27720493  | 27721436  | Intergenic                     | tRNA-Val-CTY [tRNA] tRNA    | -8334           | NR_038929    | 100131289 | Hs.200573       | NR_038929         |                 |
| P493_merge_peak_111               | chr11 | 68227328  | 68227866  | promoter-TSS (NM_001164164)    | promoter-TSS (NM_001164164) | -589            | NM_001164    | 55291     | Hs.503022       | NM_018312         | HPRD:10703      |
| P493_merge_peak_242               | chr19 | 50610105  | 50610538  | promoter-TSS (NR_024228.5)     | promoter-TSS (NR_024228.5)  | 70              | NR_024226    | 100169955 | Hs.723094       | NR_024226         |                 |
| P493_merge_peak_286               | chr5  | 140090696 | 140091147 | promoter-TSS (NR_026703)       | promoter-TSS (NR_026703)    | 60              | NR_026703    | 56664     | NR_026703       | ENSG00000199990   |                 |
| P493_merge_peak_243               | chr19 | 50615457  | 50615898  | promoter-TSS (NR_024228.4)     | promoter-TSS (NR_024228.4)  | 68              | NR_024226    | 100169955 | Hs.723094       | NR_024226         |                 |
| P493_merge_peak_44                | chr1  | 161397665 | 161398116 | Intergenic                     | tRNA-Asn-AAC [tRNA] tRNA    | -60218          | NM_0010134   | 257177    | Hs.534593       | NM_001013625      | HPRD:13257      |
| P493_merge_peak_33                | chr1  | 149679945 | 149680458 | Intergenic                     | Intergenic                  | -74049          | NM_000566    | 2209      | Hs.77424        | NM_000566         | HPRD:09094      |
| P493_merge_peak_112               | chr11 | 75946334  | 75947130  | Intergenic                     | CpG                         | -29183          | NM_004626    | 7481      | Hs.108219       | NM_004626         | HPRD:04741      |
| P493_merge_peak_241               | chr19 | 50607030  | 50607501  | promoter-TSS (NR_024215.5)     | promoter-TSS (NR_024215.5)  | 67              | NR_024229    | 100170216 | Hs.723094       | NR_024229         |                 |
| P493_merge_peak_91                | chr10 | 22518178  | 22518681  | Intergenic                     | Intergenic                  | -19517          | NM_001199    | 340900    | Hs.450519       | NM_001199938      | ENSG00000223601 |
| P493_merge_peak_20                | chr1  | 145397664 | 145398125 | intron (NM_00103970, intron 1) | tRNA-Gly-GGA [tRNA] tRNA    | -15297          | NM_213653    | 148738    | Hs.632436       | NM_145277         | HPRD:10521      |
| P493_merge_peak_211               | chr17 | 73031038  | 73031509  | intron (NR_110835, intron 1)   | tRNA-Arg-CGG [tRNA] tRNA    | 2611            | NR_110835    | 23510     | Hs.514468       | NM_015353         | HPRD:17176      |
| P493_merge_peak_63                | chr1  | 161509844 | 161510286 | Intergenic                     | tRNA-Asn-AAC [tRNA] tRNA    | 9753            | NM_001127    | 2214      | Hs.372679       | NM_000569         | HPRD:09093      |
| P493_merge_peak_368               | chr6  | 27632414  | 27633708  | Intergenic                     | Intergenic                  | -25353          | NR_038293    |           |                 |                   |                 |

|                     |       |           |           |                             |                                     |        |            |           |           |              |                   |
|---------------------|-------|-----------|-----------|-----------------------------|-------------------------------------|--------|------------|-----------|-----------|--------------|-------------------|
| P493_merge_peak_189 | chr17 | 8022293   | 8024526   | TTS (NM_032580)             | TTS (NM_032580)                     | -1175  | NM_001165  | 5934      | Hs.232770 | NM_021628    | HPRD:06231        |
| P493_merge_peak_49  | chr1  | 16141779  | 16141828  | Intergenic                  | CpG                                 | -57197 | NM_021642  | 2212      | Hs.352642 | NM_021642    | HPRD:09006        |
| P493_merge_peak_48  | chr1  | 161416742 | 161417489 | Intergenic                  | CpG                                 | -58090 | NM_021642  | 2212      | Hs.352642 | NM_021642    | HPRD:09006        |
| P493_merge_peak_118 | chr12 | 98897824  | 98898288  | promoter-TSS (NR_038383)    | promoter-TSS (NR_038383)            | -423   | NR_038383  | 643770    | Hs.129589 | NM_038383    | ENSG00000245017   |
| P493_merge_peak_357 | chr6  | 27515335  | 27515741  | Intergenic                  | tRNA-Gln-CAG [tRNA] tRNA            | -74641 | NM_007149  | 7738      | Hs.158174 | NM_007149    | HPRD:03785        |
| P493_merge_peak_348 | chr6  | 27446438  | 27446898  | Intergenic                  | tRNA-Ser-TCY [tRNA] tRNA            | -5771  | NM_007149  | 7738      | Hs.158174 | NM_007149    | HPRD:03785        |
| P493_merge_peak_191 | chr17 | 8042022   | 8042982   | Intergenic                  | Intergenic                          | 5887   | NM_106943  | 102465532 |           | NM_106943    |                   |
| P493_merge_peak_204 | chr17 | 37309781  | 37310235  | Intergenic                  | tRNA-Cys-TGY [tRNA] tRNA            | -2106  | NM_020405  | 57125     | Hs.125036 | NM_020405    | HPRD:08439        |
| P493_merge_peak_55  | chr1  | 161431541 | 161432287 | Intergenic                  | CpG                                 | -43291 | NM_021642  | 2212      | Hs.352642 | NM_021642    | HPRD:09006        |
| P493_merge_peak_394 | chr6  | 28696959  | 28697369  | Intergenic                  | Intergenic                          | 134290 | NM_033379  | 401242    | Hs.448285 | NR_033379    | ENSG00000225595   |
| P493_merge_peak_297 | chr5  | 180634598 | 180635047 | Intergenic                  | tRNA-Lys-AAG [tRNA] tRNA            | -2529  | NM_203293  | 81786     | Hs.487412 | NM_033342    | HPRD:11648        |
| P493_merge_peak_42  | chr1  | 161369308 | 161369747 | Intergenic                  | CpG                                 | -31854 | NM_0010134 | 257177    | Hs.534593 | NM_001013625 | HPRD:13257        |
| P493_merge_peak_18  | chr1  | 145395328 | 145395759 | intron (NM_00103970)        | tRNA-Lys-AAG [tRNA] tRNA            | -17648 | NM_213653  | 148738    | Hs.632436 | NM_145277    | HPRD:10521        |
| P493_merge_peak_239 | chr19 | 50600898  | 50601373  | promoter-TSS (NR_024214)    | promoter-TSS (NR_024214)            | 68     | NR_024225  | 10016954  | Hs.723094 | NR_024225    |                   |
| P493_merge_peak_186 | chr16 | 87417443  | 87417852  | promoter-TSS (NM_024735)    | promoter-TSS (NM_024735)            | -248   | NM_024735  | 79791     | Hs.567582 | NM_024735    |                   |
| P493_merge_peak_123 | chr12 | 125423905 | 125424854 | Intergenic                  | Intergenic                          | 24286  | NR_049820  | 100847004 |           | NR_049820    | miRBase:MI0018167 |
| P493_merge_peak_156 | chr15 | 66161201  | 66161635  | promoter-TSS (NM_004663)    | promoter-TSS (NM_004663)            | -379   | NM_001206  | 8766      | Hs.321541 | NM_004663    | HPRD:05715        |
| P493_merge_peak_219 | chr19 | 1021423   | 1021988   | promoter-TSS (NM_033420)    | promoter-TSS (NM_033420)            | 184    | NR_125730  | 103625684 |           | NR_125730    |                   |
| P493_merge_peak_379 | chr6  | 27870120  | 27870937  | Intergenic                  | Intergenic                          | 9325   | NM_003527  | 8348      | Hs.484991 | NM_003527    | HPRD:11904        |
| P493_merge_peak_417 | chr6  | 126101209 | 126101618 | promoter-TSS (NM_001199619) | promoter-TSS (NM_001199619)         | -894   | NM_001199  | 135112    | Hs.171426 | NM_001199    | HPRD:14814        |
| P493_merge_peak_163 | chr16 | 3202760   | 3203219   | Intergenic                  | Intergenic                          | 17855  | NM_001134  | 7760      | Hs.115284 | NM_004220    | HPRD:12224        |
| P493_merge_peak_77  | chr1  | 228759202 | 228759635 | Intergenic                  | CpG                                 | -20976 | NR_037962  | 58480     | Hs.647774 | NM_021205    | HPRD:06965        |
| P493_merge_peak_309 | chr6  | 26330333  | 26330768  | Intergenic                  | tRNA-Met-i [tRNA] tRNA              | -34837 | NM_001197  | 11118     | Hs.376046 | NM_007047    | HPRD:12547        |
| P493_merge_peak_194 | chr17 | 8124711   | 8125114   | intron (NR_026951)          | intron (NR_026951)                  | 2449   | NR_026951  | 284029    | Hs.121692 | NM_0173621   | HPRD:08755        |
| P493_merge_peak_165 | chr16 | 3208738   | 3209152   | Intergenic                  | CpG                                 | 23811  | NM_001134  | 7760      | Hs.115284 | NM_004220    | HPRD:12224        |
| P493_merge_peak_151 | chr15 | 26327193  | 26327616  | Intergenic                  | tRNA-Glu-GAG [tRNA] tRNA            | -33556 | NR_038851  | 503519    | Hs.371380 | NR_038851    | ENSG00000259150   |
| P493_merge_peak_60  | chr1  | 161493417 | 161493919 | promoter-TSS (NM_002155)    | promoter-TSS (NM_002155)            | -368   | NM_002155  | 3310      | Hs.654614 | NM_002155    | HPRD:00775        |
| P493_merge_peak_244 | chr19 | 50620805  | 50621248  | promoter-TSS (NR_024228)    | promoter-TSS (NR_024228)            | 71     | NR_024223  | 10016952  | Hs.723094 | NR_024223    |                   |
| P493_merge_peak_234 | chr19 | 48426899  | 48427277  | promoter-TSS (NR_024227)    | promoter-TSS (NR_024227)            | 52     | NR_024229  | 100170216 | Hs.723094 | NR_024229    |                   |
| P493_merge_peak_298 | chr5  | 180645012 | 180645507 | Intergenic                  | Intergenic                          | 4374   | NR_039781  | 100616342 |           | NR_039781    | miRBase:MI0017265 |
| P493_merge_peak_136 | chr14 | 21099136  | 21099528  | Intergenic                  | tRNA-Thr-ACA [tRNA] tRNA            | 10518  | NM_001001  | 341799    | Hs.513132 | NM_00101968  | HPRD:17779        |
| P493_merge_peak_378 | chr6  | 27763457  | 27763891  | Intergenic                  | tRNA-Gln-CAG [tRNA] tRNA            | 12035  | NM_003519  | 8340      | Hs.137594 | NM_003519    | HPRD:11898        |
| P493_merge_peak_133 | chr14 | 21081249  | 21082110  | Intergenic                  | Intergenic                          | -2247  | NM_001024  | 493901    | Hs.729466 | NM_001024822 | HPRD:18667        |
| P493_merge_peak_62  | chr1  | 161500761 | 161501174 | Intergenic                  | tRNA-Gly-GGA [tRNA] tRNA            | 6931   | NM_002155  | 3310      | Hs.654614 | NM_002155    | HPRD:00775        |
| P493_merge_peak_3   | chr1  | 16872236  | 16872736  | Intergenic                  | tRNA-Gly-GGG [tRNA] tRNA            | -2973  | NR_037446  | 100500876 |           | NR_037446    | miRBase:MI0016076 |
| P493_merge_peak_415 | chr6  | 28949004  | 28950213  | Intergenic                  | Intergenic                          | 23389  | NM_001010  | 282890    | Hs.148218 | NM_001010877 | HPRD:18325        |
| P493_merge_peak_43  | chr1  | 161391686 | 161392132 | Intergenic                  | tRNA-Glu-GAA [tRNA] tRNA            | -54236 | NM_0010134 | 257177    | Hs.534593 | NM_001013625 | HPRD:13257        |
| P493_merge_peak_21  | chr1  | 145399049 | 145399485 | intron (NM_00103970)        | tRNA-Glu-CAG [tRNA] tRNA            | -13924 | NM_213653  | 148738    | Hs.632436 | NM_145277    | HPRD:10521        |
| P493_merge_peak_299 | chr5  | 180644874 | 180649635 | TTS (NR_039781)             | TTS (NR_039781)                     | 439    | NR_039781  | 100616342 |           | NR_039781    | miRBase:MI0017265 |
| P493_merge_peak_315 | chr6  | 26554155  | 26554636  | Intergenic                  | tRNA-Ile-ATT [tRNA] tRNA            | 15838  | NM_006353  | 10473     | Hs.236774 | NM_006353    |                   |
| P493_merge_peak_300 | chr6  | 26286759  | 26287016  | Intergenic                  | tRNA-Met-i [tRNA] tRNA              | -1070  | NM_003543  | 8365      | Hs.591790 | NM_003543    | HPRD:11919        |
| P493_merge_peak_66  | chr1  | 16768377  | 167684231 | Intergenic                  | tRNA-Pro-CGG [tRNA] tRNA            | -1718  | NM_024569  | 9019      | Hs.493919 | NM_003953    | HPRD:05086        |
| P493_merge_peak_302 | chr6  | 26305464  | 26305960  | Intergenic                  | Intergenic                          | -19985 | NM_003543  | 8365      | Hs.591790 | NM_003543    | HPRD:11919        |
| P493_merge_peak_70  | chr1  | 22628177  | 22628609  | Intergenic                  | tRNA-Thr-ACA [tRNA] tRNA            | 83051  | NM_024746  | 79802     | Hs.665660 | NM_024746    | HPRD:08587        |
| P493_merge_peak_307 | chr6  | 26322933  | 26323405  | Intergenic                  | Intergenic                          | -37442 | NM_003543  | 8365      | Hs.591790 | NM_003543    | HPRD:11919        |
| P493_merge_peak_195 | chr17 | 8125333   | 8126383   | non-coding (NR_026951)      | non-coding (NR_026951, exon 2 of 3) | 1503   | NR_026951  | 284029    | Hs.121692 | NM_0173621   | HPRD:08755        |
| P493_merge_peak_203 | chr17 | 37025364  | 37025775  | promoter-TSS (NM_006148)    | promoter-TSS (NM_006148)            | -543   | NR_073884  | 3927      | Hs.741156 | NM_006148    | HPRD:04229        |
| P493_merge_peak_369 | chr6  | 27638177  | 27638562  | Intergenic                  | tRNA-Arg-CGY [tRNA] tRNA            | -23445 | NR_038293  | 100507173 | Hs.635987 | NR_038293    |                   |
| P493_merge_peak_401 | chr6  | 28763548  | 28763972  | Intergenic                  | tRNA-Ala-GCY [tRNA] tRNA            | 67694  | NR_033379  | 401242    | Hs.448285 | NR_033379    | ENSG00000225595   |
| P493_merge_peak_389 | chr6  | 28615784  | 28616205  | Intergenic                  | tRNA-Thr-ACG [tRNA] tRNA            | -60882 | NM_052923  | 114821    | Hs.176980 | NM_052923    | HPRD:11720        |
| P493_merge_peak_71  | chr1  | 228745848 | 228746299 | Intergenic                  | CpG                                 | -34321 | NR_037962  | 58480     | Hs.647774 | NM_021205    | HPRD:06965        |
| P493_merge_peak_210 | chr17 | 73029854  | 73030744  | intron (NR_110835)          | intron (NR_110835, intron 2 of 7)   | 1637   | NR_110835  | 23510     | Hs.514468 | NM_0115353   | HPRD:17176        |
| P493_merge_peak_53  | chr1  | 161425217 | 161425610 | Intergenic                  | CpG                                 | -49792 | NM_021642  | 2212      | Hs.352642 | NM_021642    | HPRD:09006        |
| P493_merge_peak_125 | chr13 | 4163467   | 41635059  | promoter-TSS (NM_007187)    | promoter-TSS (NM_007187)            | -829   | NM_007187  | 11193     | Hs.411300 | NM_007187    | HPRD:16086        |
| P493_merge_peak_68  | chr1  | 204475494 | 204476397 | Intergenic                  | Intergenic                          | -9562  | NM_001278  | 4194      | Hs.497492 | NM_002393    | HPRD:04082        |
| P493_merge_peak_274 | chr3  | 169489835 | 169490282 | promoter-TSS (NR_033703)    | promoter-TSS (NR_033703)            | -7985  | NM_018657  | 55892     | Hs.507025 | NM_018657    | HPRD:06920        |
| P493_merge_peak_287 | chr5  | 140098394 | 140098788 | promoter-TSS (NR_026704)    | promoter-TSS (NR_026704)            | 80     | NR_026704  | 56663     |           | NR_026704    | ENSG00000202111   |
| P493_merge_peak_377 | chr6  | 27758867  | 27759361  | Intergenic                  | Intergenic                          | 16595  | NM_003519  | 8340      | Hs.137594 | NM_003519    | HPRD:11898        |
| P493_merge_peak_58  | chr1  | 161438926 | 161439632 | Intergenic                  | CpG                                 | -35926 | NM_021642  | 2212      | Hs.352642 | NM_021642    | HPRD:09006        |
| P493_merge_peak_386 | chr6  | 28564925  | 28565339  | Intergenic                  | tRNA-Ser-AGY [tRNA] tRNA            | -10020 | NM_052923  | 114821    | Hs.176980 | NM_052923    | HPRD:11720        |
| P493_merge_peak_416 | chr6  | 25286071  | 25286082  | promoter-TSS (NM_001512)    | promoter-TSS (NM_001512)            | -398   | NM_001512  | 2941      | Hs.485557 | NM_001512    | HPRD:06899        |
| P493_merge_peak_346 | chr6  | 27300487  | 27300986  | Intergenic                  | Intergenic                          | 8196   | NR_045612  | 387316    | Hs.326753 | NM_032030    |                   |
| P493_merge_peak_59  | chr1  | 161440005 | 161440362 | Intergenic                  | CpG                                 | -35022 | NM_021642  | 2212      | Hs.352642 | NM_021642    | HPRD:09006        |
| P493_merge_peak_313 | chr6  | 26537586  | 26538520  | promoter-TSS (NM_006353)    | promoter-TSS (NM_006353)            | -519   | NM_006353  | 10473     | Hs.236774 | NM_006353    |                   |
| P493_merge_peak_308 | chr6  | 26327683  | 26328649  | Intergenic                  | Intergenic                          | -37221 | NM_001197  | 11118     | Hs.376046 | NM_007047    | HPRD:12547        |
| P493_merge_peak_412 | chr6  | 28912214  | 28912618  | TTS (NR_103538)             | TTS (NR_103538).5                   | 855    | NR_103538  | 729583    | Hs.453549 | NR_103538    |                   |
| P493_merge_peak_101 | chr11 | 59323762  | 59324209  | Intergenic                  | Intergenic                          | 38646  | NR_036120  | 100422880 |           | NR_036120    |                   |
| P493_merge_peak_87  | chr1  | 228781607 | 228782111 | intron (NR_037962)          | intron (NR_037962)                  | 1202   | NR_028384  | 574029    | Hs.647777 | NR_028384    |                   |
| P493_merge_peak_141 | chr14 | 21151294  | 21151721  | promoter-TSS (NM_001145)    | promoter-TSS (NM_001145)            | -829   | NM_001145  | 283       | Hs.283749 | NM_001145    | HPRD:00105        |
| P493_merge_peak_157 | chr15 | 68132109  | 68132598  | promoter-TSS (NR_125730)    | promoter-TSS (NR_125730).5          | 30     | NR_125730  | 103625684 |           | NR_125730    |                   |
| P493_merge_peak_145 | chr14 | 50053154  | 50053744  | promoter-TSS (NM_001032)    | promoter-TSS (NM_001032)            | -315   | NM_001030  | 6235      | Hs.156367 | NM_001032    | HPRD:04698        |
| P493_merge_peak_84  | chr1  | 228774901 | 228775358 | Intergenic                  | CpG                                 | -5265  | NR_037962  | 58480     | Hs.647774 | NM_021205    | HPRD:06965        |
| P493_merge_peak_200 | chr17 | 36907842  | 36908263  | promoter-TSS (NM_002795)    | promoter-TSS (NM_002795)            | -914   | NR_104194  | 5691      | Hs.82793  | NM_002795    | HPRD:03709        |
| P493_merge_peak_444 | chr8  | 67026142  | 67026673  | Intergenic                  | Intergenic                          | -12871 | NM_184087  | 84675     | Hs.85524  | NM_033058    | HPRD:05927        |
| P493_merge_peak_90  | chr10 | 5895316   | 5895900   | Intergenic                  | AluSq [SINE] Alu                    | -35927 | NM_001258  | 84893     | Hs.495443 | NM_032807    | HPRD:06243        |
| P493_merge_peak_131 | chr14 | 21077327  | 21077731  | Intergenic                  | tRNA-Pro-CCY [tRNA] tRNA            | -18547 | NM_001024  | 493901    | Hs.729466 | NM_001024822 | HPRD:18667        |
| P493_merge_peak_455 | chr9  | 137029408 | 137029956 | promoter-TSS (NR_023344)    | promoter-TSS (NR_023344)            | 4      | NR_023344  | 100151684 | Hs.545589 | NR_023344    | ENSG00000221676   |
| P493_merge_peak_172 | chr16 | 3239464   | 3239856   | Intergenic                  | tRNA-Pro-CCY [tRNA] tRNA            | -14587 | NM_012360  | 4992      | Hs.664502 | NM_012360    | HPRD:09125        |
| P493_merge_peak_384 | chr6  | 28510662  | 28511080  | Intergenic                  | Intergenic                          | 17082  | NM_003996  | 2880      | Hs.248129 | NM_001509    | HPRD:11941        |
| P493_merge_peak_24  | chr1  | 147774633 | 147775088 | intron (NR_102404)          | tRNA-His-CAY [tRNA] tRNA            | 31818  | NR_049810  | 100847044 |           | NR_049810    |                   |
| P493_merge_peak_27  | chr1  | 148000645 | 148001086 | intron (NR_102404)          | tRNA-Asn-AAAC [tRNA] tRNA           | 6719   | NR_104086  | 101954277 |           | NR_104086    |                   |
| P493_merge_peak_140 | chr14 | 21149708  | 21150116  | Intergenic                  | tRNA-Gln-CAG [tRNA] tRNA            | -2424  | NM_001145  | 283       | Hs.283749 | NM_001145    | HPRD:00105        |
| P493_merge_peak_64  | chr1  | 161582359 | 161582747 | Intergenic                  | tRNA-Gly-GGA [tRNA] tRNA            | 6704   | NR_024151  | 3311      | Hs.662180 | NR_024151    |                   |
| P493_merge_peak_193 | chr17 | 8123991   | 8124408   | non-coding (NR_026951)      | non-coding (NR_026951, exon 3 of 3) | 3162   | NR_026951  | 284       |           |              |                   |

|                     |       |           |           |                                     |                                     |         |           |           |           |              |                   |
|---------------------|-------|-----------|-----------|-------------------------------------|-------------------------------------|---------|-----------|-----------|-----------|--------------|-------------------|
| P493_merge_peak_403 | chr6  | 28775475  | 28775816  | Intergenic                          | tRNA-Phe-TTY [tRNA] tRNA            | 55809   | NR_033379 | 401242    | Hs.448285 | NR_033379    | ENSG00000225595   |
| P493_merge_peak_399 | chr6  | 28757375  | 28757748  | Intergenic                          | tRNA-Ala-GCA [tRNA] tRNA            | 73893   | NR_033379 | 401242    | Hs.448285 | NR_033379    | ENSG00000225595   |
| P493_merge_peak_314 | chr6  | 26553597  | 26553975  | Intergenic                          | tRNA-Ala-GCG [tRNA] tRNA            | 15214   | NM_006353 | 10473     | Hs.236774 | NM_006353    |                   |
| P493_merge_peak_371 | chr6  | 27652164  | 27652684  | Intergenic                          |                                     | -9390   | NR_038293 | 100507173 | Hs.635987 | NR_038292    |                   |
| P493_merge_peak_173 | chr16 | 3241365   | 3242321   | Intergenic                          |                                     | -12449  | NM_012360 | 4992      | Hs.664502 | NM_012360    | HPRD:09125        |
| P493_merge_peak_273 | chr3  | 131950464 | 131950853 | Intergenic                          | tRNA-Cys-TGY [tRNA] tRNA            | -85553  | NM_001099 | 55        | Hs.433060 | NM_001099    | HPRD:01378        |
| P493_merge_peak_332 | chr6  | 27125752  | 27126198  | Intergenic                          | tRNA-His-CAY [tRNA] tRNA            | 10570   | NR_036096 | 100422934 |           | NR_036096    | miRBase:MI0014167 |
| P493_merge_peak_57  | chr1  | 161435125 | 161435598 | Intergenic                          | CpG                                 | -39844  | NM_021642 | 2212      | Hs.352642 | NM_021642    | HPRD:09096        |
| P493_merge_peak_233 | chr19 | 48421539  | 48421941  | promoter-TSS (NR_004436)            | promoter-TSS (NR_004436)            | 54      | NR_004435 | 100126798 | Hs.579631 | NR_004435    |                   |
| P493_merge_peak_236 | chr19 | 49534774  | 49535174  | promoter-TSS (NM_033378)            | promoter-TSS (NM_033378)            | 70      | NR_024244 | 100170228 | Hs.717308 | NR_024244    |                   |
| P493_merge_peak_341 | chr6  | 27247878  | 27248238  | Intergenic                          | tRNA-Val-GTG [tRNA] tRNA            | 31953   | NM_033482 | 94026     | Hs.729955 | NM_033482    | ENSG00000158553   |
| P493_merge_peak_47  | chr1  | 161412958 | 161413322 | Intergenic                          | CpG                                 | -62065  | NM_021642 | 2212      | Hs.352642 | NM_021642    | HPRD:09096        |
| P493_merge_peak_67  | chr1  | 167684568 | 167684944 | Intergenic                          | tRNA-Pro-CCY [tRNA] tRNA            | -6431   | NM_024569 | 9019      | Hs.493919 | NM_030953    | HPRD:05086        |
| P493_merge_peak_454 | chr9  | 131102000 | 131102602 | promoter-TSS (NM_005094)            | promoter-TSS (NM_005094)            | -538    | NM_005094 | 10999     | Hs.656699 | NM_005094    | HPRD:09172        |
| P493_merge_peak_402 | chr6  | 28770363  | 28770761  | Intergenic                          |                                     | 60892   | NR_033379 | 401242    | Hs.448285 | NR_033379    | ENSG00000225595   |
| P493_merge_peak_144 | chr14 | 32672165  | 32672585  | promoter-TSS (NR_125730).4          | promoter-TSS (NR_125730).4          | 100     | NR_125730 | 103625684 |           | NR_125730    |                   |
| P493_merge_peak_360 | chr6  | 27551074  | 27551440  | Intergenic                          | tRNA-Asp-GAY [tRNA] tRNA            | -110360 | NM_007149 | 7738      | Hs.158174 | NM_007149    | HPRD:03785        |
| P493_merge_peak_319 | chr6  | 26571838  | 26572278  | Intergenic                          |                                     | -25113  | NM_013375 | 29777     | Hs.254406 | NM_013375    | HPRD:16469        |
| P493_merge_peak_169 | chr16 | 3232447   | 3232840   | Intergenic                          | tRNA-Pro-CCY [tRNA] tRNA            | -21604  | NM_012360 | 4992      | Hs.664502 | NM_012360    | HPRD:09125        |
| P493_merge_peak_350 | chr6  | 27463480  | 27463861  | Intergenic                          | tRNA-Ser-TCY [tRNA] tRNA            | -22773  | NM_007149 | 7738      | Hs.158174 | NM_007149    | HPRD:03785        |
| P493_merge_peak_51  | chr1  | 161420365 | 161420735 | Intergenic                          | CpG                                 | -54655  | NM_021642 | 2212      | Hs.352642 | NM_021642    | HPRD:09096        |
| P493_merge_peak_382 | chr6  | 28456567  | 28456992  | Intergenic                          | tRNA-Thr-ACG [tRNA] tRNA            | 26791   | NM_182701 | 257202    | Hs.448570 | NM_182701    | HPRD:12132        |
| P493_merge_peak_349 | chr6  | 274477300 | 27447702  | Intergenic                          | tRNA-Asp-GAY [tRNA] tRNA            | -6604   | NM_007149 | 7738      | Hs.158174 | NM_007149    | HPRD:03785        |
| P493_merge_peak_272 | chr3  | 131947733 | 131948175 | Intergenic                          | tRNA-Cys-TGY [tRNA] tRNA            | -88237  | NM_001099 | 55        | Hs.433060 | NM_001099    | HPRD:01378        |
| P493_merge_peak_339 | chr6  | 27205142  | 27205526  | Intergenic                          |                                     | -10168  | NM_005865 | 10279     | Hs.274407 | NM_005865    | HPRD:06205        |
| P493_merge_peak_358 | chr6  | 27521007  | 27521391  | Intergenic                          | tRNA-Ser-TCY [tRNA] tRNA            | -80302  | NM_007149 | 7738      | Hs.158174 | NM_007149    | HPRD:03785        |
| P493_merge_peak_54  | chr1  | 161427778 | 161428128 | Intergenic                          | CpG                                 | -47252  | NM_021642 | 2212      | Hs.352642 | NM_021642    | HPRD:09096        |
| P493_merge_peak_180 | chr16 | 22309630  | 22310034  | intron (NM_00125803)                | MIR [SINE] MIR                      | 1136    | NM_001258 | 55718     | Hs.460298 | NM_001258    | HPRD:15155        |
| P493_merge_peak_29  | chr1  | 148598071 | 148598536 | intron (NR_104217, intron 2 of 17)  | intron (NR_104217, intron 2 of 17)  | 37456   | NM_173638 | 284565    | Hs.523572 | NM_173638    | HPRD:14710        |
| P493_merge_peak_365 | chr6  | 27586050  | 27586381  | Intergenic                          |                                     | -75599  | NR_038293 | 100507173 | Hs.635987 | NR_038292    |                   |
| P493_merge_peak_2   | chr1  | 16861508  | 16861983  | Intergenic                          | CpG                                 | -13664  | NR_037446 | 100500876 |           | NR_037446    | miRBase:MI0016076 |
| P493_merge_peak_336 | chr6  | 27182819  | 27183164  | Intergenic                          | tRNA-Arg-CGY [tRNA] tRNA            | -32511  | NM_005865 | 10279     | Hs.274407 | NM_005865    | HPRD:06205        |
| P493_merge_peak_285 | chr5  | 135416031 | 135416413 | promoter-TSS (NR_030583)            | promoter-TSS (NR_030583)            | 64      | NR_030583 | 100126299 |           | NR_030583    | ENSG000002270123  |
| P493_merge_peak_46  | chr1  | 161410051 | 161410806 | Intergenic                          | CpG                                 | -64577  | NM_021642 | 2212      | Hs.352642 | NM_021642    | HPRD:09096        |
| P493_merge_peak_228 | chr19 | 39902660  | 39903051  | promoter-TSS (NM_022835)            | promoter-TSS (NM_022835)            | -895    | NM_022835 | 64857     | Hs.631574 | NM_022835    | HPRD:15148        |
| P493_merge_peak_231 | chr19 | 45981698  | 45982073  | Intergenic                          | tRNA-SeC(E)-TGA [tRNA] tRNA         | 10632   | NM_006732 | 2354      | Hs.590558 | NM_006732    | HPRD:01270        |
| P493_merge_peak_293 | chr5  | 180600357 | 180601199 | Intergenic                          |                                     | 18040   | NR_108031 | 102577426 | Hs.277359 | NR_108031    |                   |
| P493_merge_peak_30  | chr1  | 148760516 | 148760481 | intron (NR_104217, intron 2 of 17)  | intron (NR_104217, intron 2 of 17)  | -45697  | NM_001144 | 730262    |           | NM_001144032 |                   |
| P493_merge_peak_393 | chr6  | 28687369  | 28687780  | Intergenic                          |                                     | -132462 | NM_052923 | 114821    | Hs.176980 | NM_052923    | HPRD:11720        |
| P493_merge_peak_333 | chr6  | 271229919 | 27130286  | Intergenic                          | tRNA-Thr-ACY [tRNA] tRNA            | 14697   | NR_036096 | 100422934 |           | NR_036096    | miRBase:MI0014167 |
| P493_merge_peak_356 | chr6  | 27513339  | 27513722  | Intergenic                          | tRNA-Ser-TCA [tRNA] tRNA            | -72633  | NM_007149 | 7738      | Hs.158174 | NM_007149    | HPRD:03785        |
| P493_merge_peak_159 | chr15 | 80036880  | 80037211  | Intergenic                          | tRNA-Cys-TGY [tRNA] tRNA            | 152294  | NR_037654 | 10588     | Hs.194294 | NM_006441    |                   |
| P493_merge_peak_342 | chr6  | 27261546  | 27261893  | Intergenic                          | tRNA-Ile-ATT [tRNA] tRNA            | 18292   | NM_033482 | 94026     | Hs.729955 | NM_033482    | ENSG00000158553   |
| P493_merge_peak_428 | chr7  | 148680709 | 148681091 | Intergenic                          | HY3 [scRNA] scRNA                   | 44882   | NM_004911 | 9601      | Hs.93659  | NM_004911    | HPRD:06501        |
| P493_merge_peak_396 | chr6  | 28710488  | 28710924  | Intergenic                          |                                     | 120748  | NR_033379 | 401242    | Hs.448285 | NR_033379    | ENSG00000225595   |
| P493_merge_peak_327 | chr6  | 26745112  | 26745457  | Intergenic                          | tRNA-Ile-ATT [tRNA] tRNA            | -85304  | NM_001242 | 79692     | Hs.126280 | NM_001242    | HPRD:02469        |
| P493_merge_peak_361 | chr6  | 27559430  | 27559816  | Intergenic                          | tRNA-Lys-AAA [tRNA] tRNA            | -102191 | NR_038293 | 100507173 | Hs.635987 | NR_038292    |                   |
| P493_merge_peak_400 | chr6  | 28758359  | 28758690  | Intergenic                          | tRNA-Phe-TTY [tRNA] tRNA            | 72930   | NR_033379 | 401242    | Hs.448285 | NR_033379    | ENSG00000225595   |
| P493_merge_peak_34  | chr1  | 149683940 | 149684319 | Intergenic                          | tRNA-Val-GTG [tRNA] tRNA            | -70121  | NM_000566 | 2209      | Hs.77424  | NM_000566    | HPRD:09094        |
| P493_merge_peak_316 | chr6  | 26555370  | 26555759  | Intergenic                          | tRNA-Pro-CCY [tRNA] tRNA            | 16994   | NM_006353 | 10473     | Hs.236774 | NM_006353    |                   |
| P493_merge_peak_303 | chr6  | 26311281  | 26311601  | Intergenic                          | tRNA-Gln-CAA [tRNA] tRNA            | -25714  | NM_003543 | 8365      | Hs.591790 | NM_003543    | HPRD:11919        |
| P493_merge_peak_304 | chr6  | 26311831  | 26312165  | Intergenic                          | tRNA-Gln-CAA [tRNA] tRNA            | -26271  | NM_003543 | 8365      | Hs.591790 | NM_003543    | HPRD:11919        |
| P493_merge_peak_99  | chr11 | 35547886  | 35548368  | promoter-TSS (NM_015430)            | promoter-TSS (NM_015430)            | -548    | NM_001282 | 25891     | Hs.55044  | NM_015430    | HPRD:07104        |
| P493_merge_peak_351 | chr6  | 27470684  | 27471095  | Intergenic                          | tRNA-Ser-TCY [tRNA] tRNA            | -29992  | NM_007149 | 7738      | Hs.158174 | NM_007149    | HPRD:03785        |
| P493_merge_peak_404 | chr6  | 28779715  | 28780073  | Intergenic                          | tRNA-Ala-GCY [tRNA] tRNA            | 51560   | NR_033379 | 401242    | Hs.448285 | NR_033379    | ENSG00000225595   |
| P493_merge_peak_352 | chr6  | 27471411  | 27471733  | Intergenic                          | tRNA-Asp-GAY [tRNA] tRNA            | -30675  | NM_007149 | 7738      | Hs.158174 | NM_007149    | HPRD:03785        |
| P493_merge_peak_26  | chr1  | 147825567 | 147825945 | intron (NR_102404, intron 17 of 18) | tRNA-Gln-CAG [tRNA] tRNA            | -19078  | NR_049810 | 100847044 |           | NR_049810    |                   |
| P493_merge_peak_138 | chr14 | 21121115  | 21121470  | Intergenic                          | tRNA-Tyr-TAC [tRNA] tRNA            | -11442  | NM_001001 | 341799    | Hs.513132 | NM_00101968  | HPRD:17779        |
| P493_merge_peak_395 | chr6  | 28703010  | 28703410  | Intergenic                          | tRNA-Ala-GCY [tRNA] tRNA            | 128244  | NR_033379 | 401242    | Hs.448285 | NR_033379    | ENSG00000225595   |
| P493_merge_peak_6   | chr1  | 17053675  | 17054041  | Intergenic                          |                                     | 7098    | NM_001282 | 729574    |           | NM_001282321 | ENSG00000237847   |
| P493_merge_peak_347 | chr6  | 27302582  | 27302986  | Intergenic                          | tRNA-Lys-AAA [tRNA] tRNA            | 10244   | NR_045612 | 387316    | Hs.326753 | NM_032030    |                   |
| P493_merge_peak_321 | chr6  | 26577129  | 26577630  | Intergenic                          |                                     | -19747  | NM_013375 | 29777     | Hs.254406 | NM_013375    | HPRD:16469        |
| P493_merge_peak_359 | chr6  | 27543746  | 27544051  | Intergenic                          | tRNA-Lys-AAA [tRNA] tRNA            | -103001 | NM_007149 | 7738      | Hs.158174 | NM_007149    | HPRD:03785        |
| P493_merge_peak_344 | chr6  | 27265650  | 27266027  | Intergenic                          | tRNA-Ser-AGY [tRNA] tRNA            | 14173   | NM_033482 | 94026     | Hs.729955 | NM_033482    | ENSG00000158553   |
| P493_merge_peak_337 | chr6  | 27198038  | 27198536  | Intergenic                          |                                     | -17215  | NM_005865 | 10279     | Hs.274407 | NM_005865    | HPRD:06205        |
| P493_merge_peak_291 | chr5  | 180591051 | 180591406 | Intergenic                          |                                     | 9285    | NM_206880 | 285659    | Hs.553681 | NM_206880    | HPRD:14956        |
| P493_merge_peak_8   | chr1  | 17188322  | 17188680  | Intergenic                          |                                     | -2985   | NR_037446 | 100500876 |           | NR_037446    | miRBase:MI0016076 |
| P493_merge_peak_25  | chr1  | 147775522 | 147775841 | intron (NR_102404, intron 17 of 18) | intron (NR_102404, intron 17 of 18) | 30997   | NR_049810 | 100847044 |           | NR_049810    |                   |
| P493_merge_peak_135 | chr14 | 21098405  | 21098772  | Intergenic                          |                                     | 11262   | NM_001001 | 341799    | Hs.513132 | NM_00101968  | HPRD:17779        |
| P493_merge_peak_387 | chr6  | 28574825  | 28575151  | Intergenic                          | tRNA-Ala-GCY [tRNA] tRNA            | -19876  | NM_052923 | 114821    | Hs.176980 | NM_052923    | HPRD:11720        |
| P493_merge_peak_373 | chr6  | 27688741  | 27689078  | Intergenic                          | tRNA-Leu-TTA [tRNA] tRNA            | 27051   | NR_038292 | 100507173 | Hs.635987 | NR_038292    |                   |
| P493_merge_peak_170 | chr16 | 3233977   | 3234366   | Intergenic                          | tRNA-Pro-CCA [tRNA] tRNA            | -20076  | NM_012360 | 4992      | Hs.664502 | NM_012360    | HPRD:09125        |
| P493_merge_peak_197 | chr17 | 17863459  | 17863779  | intron (NM_00103355)                | MIRb [SINE] MIR                     | 12165   | NM_001082 | 146691    | Hs.462379 | NM_144678    | HPRD:18213        |
| P493_merge_peak_366 | chr6  | 27599113  | 27599488  | Intergenic                          |                                     | -62514  | NR_038293 | 100507173 | Hs.635987 | NR_038292    |                   |
| P493_merge_peak_254 | chr2  | 47562367  | 47562797  | intron (NR_110208, intron 2)        | BC200 [scRNA] scRNA                 | 9631    | NR_110207 | 101927043 | Hs.515976 | NR_110207    | ENSG00000234690   |
| P493_merge_peak_289 | chr5  | 180523957 | 180524397 | Intergenic                          |                                     | 28127   | NM_001258 | 26693     | Hs.742585 | NM_001258283 | ENSG00000185372   |
| P493_merge_peak_323 | chr6  | 26701634  | 26702017  | Intergenic                          |                                     | -41845  | NM_001242 | 79692     | Hs.126280 | NM_001242    | HPRD:02469        |
| P493_merge_peak_427 | chr7  | 148660279 | 148660681 | Intergenic                          | HY4 [scRNA] scRNA                   | 65302   | NM_004911 | 9601      | Hs.93659  | NM_004911    | HPRD:06501        |
| P493_merge_peak_225 | chr19 | 18392434  | 18392757  | promoter-TSS (NR_036155)            | promoter-TSS (NR_036155)            | -129    | NM_001286 | 3727      | Hs.2780   | NM_005354    | HPRD:01304        |
| P493_merge_peak_35  | chr1  | 149711634 | 149711980 | Intergenic                          | tRNA-Asn-AAC [tRNA] tRNA            | -42443  | NM_000566 | 2209      | Hs.77424  | NM_000566    | HPRD:09094        |
| P493_merge_peak_15  | chr1  | 93981663  | 93982012  | intron (NM_00102494)                | tRNA-Cys-TGY [tRNA] tRNA            | 68149   | NM_001024 | 54874     | Hs.134060 | NM_017737    | HPRD:12317        |
| P493_merge_peak_331 | chr6  | 27064977  | 27065350  | Intergenic                          | tRNA-Ser-AGY [tRNA] tRNA            | 35412   | NM_021058 | 8970      | Hs.591807 | NM_021058    |                   |
| P493_merge_peak_397 | chr6  | 28715404  | 28715787  | Intergenic                          |                                     | 115859  | NR_033379 | 401242    | Hs.448285 | NR_033379    | ENSG00000225595   |
| P493_merge_peak_338 | chr6  | 27203192  | 27203502  | Intergenic                          | tRNA-Val-GTY [tRNA] tRNA            | -12155  | NM_005865 | 10279     | Hs.274407 | NM_005865    | HPRD:06205        |
| P493_merge_peak_374 | chr6  | 27694353  |           |                                     |                                     |         |           |           |           |              |                   |

|                     |             |           |           |                                       |                                       |         |           |           |           |              |                   |
|---------------------|-------------|-----------|-----------|---------------------------------------|---------------------------------------|---------|-----------|-----------|-----------|--------------|-------------------|
| P493_merge_peak_120 | chr12       | 113552284 | 113552524 | intron (NM_00119352)                  | MIR SINE MIR                          | 21000   | NM_001301 | 8437      | Hs.528693 | NM_004658    | HPRD:04986        |
| P493_merge_peak_106 | chr11       | 6333452   | 63334788  | Intergenic                            | LTR4 LTR ERV1                         | -3815   | NM_017878 | 54979     | Hs.272805 | NM_017878    | HPRD:13670        |
| P493_merge_peak_329 | chr6        | 26773677  | 26773927  | Intergenic                            | tRNA-Ala-GCyl tRNA tRNA               | -113822 | NM_001242 | 79692     | Hs.126280 | NM_024639    |                   |
| P493_merge_peak_249 | chr19       | 54370724  | 54371016  | promoter-TSS (NM_001290190)           | promoter-TSS (NM_001290190)           | -249    | NM_001290 | 91663     | Hs.380906 | NM_138373    | HPRD:14792        |
| P493_merge_peak_39  | chr1        | 159111291 | 159111542 | Intergenic                            | tRNA-Arg-AGA tRNA tRNA                | -29961  | NM_021189 | 57863     | Hs.365689 | NM_021189    | HPRD:13733        |
| P493_merge_peak_237 | chr19       | 49540261  | 49540527  | promoter-TSS (NM_033377)              | promoter-TSS (NM_033377)              | 117     | NM_004383 | 100126780 | Hs.621635 | NR_004383    |                   |
| P493_merge_peak_283 | chr5        | 55884786  | 55885067  | intron (NM_001287053, intron 1 of 5)  | tRNA-Cys-TGY tRNA tRNA                | -17133  | NM_001287 | 101928448 | Hs.208052 | NM_001287053 |                   |
| P493_merge_peak_437 | chr7        | 149361836 | 149362109 | Intergenic                            | tRNA-Cys-TGY tRNA tRNA                | -40091  | NR_027789 | 79970     | Hs.520785 | NM_024910    | HPRD:07791        |
| P493_merge_peak_280 | chr4        | 80979917  | 80980221  | intron (NM_00128678)                  | L4 LINE L1 RT                         | 14408   | NM_001286 | 118429    | Hs.162963 | NM_058172    | HPRD:07452        |
| P493_merge_peak_208 | chr17       | 56415444  | 56415710  | intron (NR_038416, intron 1 of 2)     | intron (NR_038416, intron 1 of 2)     | 1014    | NR_038417 | 100506779 | Hs.718477 | NR_038410    | ENSG00000265148   |
| P493_merge_peak_432 | chr7        | 149052643 | 149052904 | Intergenic                            | tRNA-Cys-TGY tRNA tRNA                | 70401   | NR_036573 | 155060    | Hs.490512 | NR_015357    | HPRD:17309        |
| P493_merge_peak_430 | chr7        | 149007200 | 149007515 | Intergenic                            | Intergenic                            | 24985   | NR_036573 | 155060    | Hs.490512 | NR_015357    | HPRD:17309        |
| P493_merge_peak_119 | chr12       | 109085362 | 109085626 | intron (NM_00110523)                  | intron (NM_00110523, intron 2 of 1)   | 11280   | NM_001105 | 23603     | Hs.330384 | NM_014325    | HPRD:09244        |
| P493_merge_peak_148 | chr14       | 75725797  | 75726086  | Intergenic                            | CpG                                   | -19540  | NM_005252 | 2353      | Hs.25647  | NM_005252    | HPRD:01275        |
| P493_merge_peak_171 | chr16       | 3237733   | 3238258   | Intergenic                            | Intergenic                            | -16252  | NM_012360 | 4992      | Hs.664502 | NM_012360    | HPRD:09125        |
| P493_merge_peak_446 | chr8        | 103506842 | 103507109 | Intergenic                            | MIR SINE MIR                          | -56873  | NM_024410 | 4956      | Hs.159274 | NM_024410    | HPRD:01687        |
| P493_merge_peak_9   | chr1        | 17199034  | 17199292  | Intergenic                            | CpG                                   | -13647  | NR_037446 | 100500876 |           | NR_037446    | miRBase:MI0016076 |
| P493_merge_peak_340 | chr6        | 27242886  | 27243138  | Intergenic                            | tRNA-Ile-ATT tRNA tRNA                | 27516   | NM_005865 | 10279     | Hs.274407 | NM_005865    | HPRD:06205        |
| P493_merge_peak_434 | chr7        | 149074528 | 149074760 | Intergenic                            | tRNA-Cys-TGY tRNA tRNA                | 83409   | NM_015694 | 27153     | Hs.38512  | NM_015694    | HPRD:13849        |
| P493_merge_peak_17  | chr1        | 145379103 | 145379371 | intron (NM_001039703, intron 68 of 8) | intron (NM_001039703, intron 68 of 8) | -33954  | NM_012363 | 148738    | Hs.632436 | NM_145277    | HPRD:10521        |
| P493_merge_peak_433 | chr7        | 149072729 | 149072990 | Intergenic                            | tRNA-Cys-TGY tRNA tRNA                | 85194   | NM_015694 | 27153     | Hs.38512  | NM_015694    | HPRD:13849        |
| P493_merge_peak_282 | chr5        | 10137     | 11691     | Intergenic                            | (CCCTAA)n Simple_repeat Simple_re     | -129459 | NM_052909 | 153478    | Hs.535800 | NM_052909    |                   |
| P493_merge_peak_448 | chr9        | 3528183   | 3526031   | promoter-TSS (NM_001282116)           | promoter-TSS (NM_001282116)           | 79      | NM_001282 | 5991      | Hs.136829 | NM_002919    | HPRD:03215        |
| P493_merge_peak_320 | chr6        | 26575737  | 26576003  | Intergenic                            | tRNA-Tyr-TAC tRNA tRNA                | -21301  | NM_013375 | 29777     | Hs.254406 | NM_013375    | HPRD:16469        |
| P493_merge_peak_22  | chr1        | 147752560 | 147752782 | intron (NR_102404, intron 17 of 18)   | intron (NR_102404, intron 17 of 18)   | -3329   | NR_120331 | 101927468 | Hs.515867 | NR_120331    |                   |
| P493_merge_peak_376 | chr6        | 27745612  | 27745822  | Intergenic                            | tRNA-Met-i tRNA tRNA                  | 16196   | NR_038929 | 100131289 | NM_200573 | NR_038929    |                   |
| P493_merge_peak_383 | chr6        | 28505329  | 28505557  | Intergenic                            | tRNA-Ile-ATA tRNA tRNA                | 11654   | NM_003996 | 2880      | Hs.244129 | NM_015059    | HPRD:11941        |
| P493_merge_peak_335 | chr6        | 27181480  | 27181769  | Intergenic                            | tRNA-Arg-CGY tRNA tRNA                | -33878  | NM_005865 | 10279     | Hs.274407 | NM_005865    | HPRD:06205        |
| P493_merge_peak_271 | chr3        | 12027774  | 120277971 | Intergenic                            | Intergenic                            | -37256  | NM_004547 | 4710      | Hs.304613 | NM_004547    | HPRD:11955        |
| P493_merge_peak_126 | chr13       | 42029906  | 42030168  | Intergenic                            | LTR2C LTR ERV1                        | -1505   | NM_014059 | 28984     | Hs.507866 | NM_014059    | HPRD:17970        |
| P493_merge_peak_326 | chr6        | 26735496  | 26735726  | Intergenic                            | tRNA-Met tRNA tRNA                    | -75631  | NM_001242 | 79692     | Hs.126280 | NM_024639    |                   |
| P493_merge_peak_232 | chr19       | 46220611  | 46220858  | intron (NM_001080469, intron 1 of 1)  | intron (NM_001080469, intron 1 of 1)  | 13417   | NM_001080 | 23403     | Hs.128072 | NM_001080469 | ENSG00000177051   |
| P493_merge_peak_110 | chr11       | 67203875  | 67204129  | intron (NM_005608, intron 12)         | L2a LINE L2                           | 1151    | NM_005608 | 5790      | Hs.155975 | NM_005608    |                   |
| P493_merge_peak_453 | chr9        | 126147288 | 126147747 | intron (NM_020946, intron 1)          | intron (NM_020946, intron 1)          | 16459   | NR_104603 | 286204    | Hs.568340 | NR_104603    | HPRD:13093        |
| P493_merge_peak_355 | chr6        | 27509387  | 27509682  | Intergenic                            | Intergenic                            | -68637  | NM_007149 | 7738      | Hs.158174 | NM_007149    | HPRD:03785        |
| P493_merge_peak_263 | chr21       | 9825995   | 9826297   | promoter-TSS (NR_037458)              | promoter-TSS (NR_037458)              | -57     | NR_037458 | 100500815 |           | NR_037458    | miRBase:MI0016088 |
| P493_merge_peak_452 | chr9        | 92305434  | 92305711  | intron (NR_024280, intron 3 of 5)     | intron (NR_024280, intron 3 of 5)     | 50874   | NR_024280 | 100129066 | Hs.125947 | NR_024280    |                   |
| P493_merge_peak_98  | chr10       | 133575526 | 133575785 | Intergenic                            | Intergenic                            | 46880   | NR_038365 | 39827     | Hs.523353 | NM_00101677  | HPRD:13530        |
| P493_merge_peak_45  | chr1        | 161409873 | 161410094 | Intergenic                            | tRNA-Gly-GGA tRNA tRNA                | -65222  | NM_021642 | 2212      | Hs.352642 | NM_021642    | HPRD:09006        |
| P493_merge_peak_115 | chr12       | 90343724  | 90343939  | Intergenic                            | Intergenic                            | 241099  | NR_028138 | 338758    | Hs.601766 | NR_028138    | ENSG00000271614   |
| P493_merge_peak_94  | chr10       | 42529533  | 42529765  | Intergenic                            | ALR Alpha Satellite centr             | 333844  | NR_024380 | 441666    | Hs.255729 | NR_024380    | ENSG00000215146   |
| P493_merge_peak_224 | chr19       | 16435278  | 16435492  | promoter-TSS (NM_016270)              | promoter-TSS (NM_016270)              | -266    | NM_016270 | 10365     | Hs.744182 | NM_016270    | HPRD:03602        |
| P493_merge_peak_113 | chr11       | 122430603 | 122430829 | Intergenic                            | tRNA-Lys-AAAl tRNA tRNA               | -95682  | NM_032873 | 84959     | Hs.444075 | NM_032873    | HPRD:16463        |
| P493_merge_peak_109 | chr11       | 66189126  | 66189364  | intron (NM_178864, intron 1)          | CpG                                   | 770     | NM_178864 | 266743    | Hs.256036 | NM_178864    | HPRD:12260        |
| P493_merge_peak_92  | chr10       | 23286159  | 23286412  | intron (NM_173081, intron 10 of 18)   | intron (NM_173081, intron 10 of 18)   | 69332   | NM_001282 | 219681    | Hs.659807 | NM_173081    | HPRD:12487        |
| P493_merge_peak_328 | chr6        | 26766630  | 26766858  | Intergenic                            | tRNA-Met-i tRNA tRNA                  | -106504 | NM_001242 | 79692     | Hs.126280 | NM_024639    |                   |
| P493_merge_peak_471 | chrX        | 47662024  | 47662224  | Intergenic                            | tRNA-Gly-GGA tRNA tRNA                | -34177  | NM_007137 | 347344    | Hs.114246 | NM_007137    | ENSG00000197779   |
| P493_merge_peak_275 | chr3        | 172468136 | 172468358 | promoter-TSS (NM_001258316)           | promoter-TSS (NM_001258316)           | -228    | NM_001258 | 1894      | Hs.518299 | NM_018098    | HPRD:11860        |
| P493_merge_peak_50  | chr1        | 161418717 | 161418908 | Intergenic                            | CpG                                   | -56393  | NM_021642 | 2212      | Hs.352642 | NM_021642    | HPRD:09006        |
| P493_merge_peak_89  | chr10       | 3915992   | 3916185   | Intergenic                            | Intergenic                            | -88615  | NM_001160 | 1316      | Hs.4055   | NM_001300    | HPRD:03632        |
| P493_merge_peak_69  | chr1        | 207510611 | 207510820 | exon (NM_000574, exon 8 of 10)        | exon (NM_000574, exon 8 of 10)        | 15898   | NM_001300 | 1604      | Hs.126517 | NM_000574    | HPRD:05000        |
| P493_merge_peak_440 | chr8        | 37739417  | 37739639  | intron (NM_001002814, intron 3 of 5)  | intron (NM_001002814, intron 3 of 5)  | 17487   | NM_025151 | 80223     | Hs.191179 | NM_025151    | HPRD:09787        |
| P493_merge_peak_150 | chr14       | 105948411 | 105948504 | Intergenic                            | Intergenic                            | 4739    | NR_073805 | 1397      | Hs.534309 | NM_001312    | HPRD:03113        |
| P493_merge_peak_212 | chr17       | 79479802  | 79480007  | promoter-TSS (NM_001614)              | promoter-TSS (NM_001614)              | -12     | NM_001199 | 71        | Hs.514581 | NM_001614    | HPRD:00017        |
| P493_merge_peak_223 | chr19       | 14116930  | 14117177  | promoter-TSS (NM_002918)              | promoter-TSS (NM_002918)              | 81      | NM_002918 | 5989      | Hs.655215 | NM_002918    | HPRD:02476        |
| P493_merge_peak_41  | chr1        | 158993530 | 158993731 | promoter-TSS (NM_001277224)           | promoter-TSS (NM_001277224)           | -123    | NM_001277 | 8407      | Hs.517168 | NM_003564    | HPRD:06864        |
| P493_merge_peak_11  | chr1        | 19278614  | 19278842  | intron (NM_001136265, intron 1 of 8)  | intron (NM_001136265, intron 1 of 8)  | 4083    | NM_001136 | 126917    | Hs.466625 | NM_001136265 | ENSG00000169991   |
| P493_merge_peak_422 | chr7        | 101387518 | 101387846 | Intergenic                            | AluS1 SINE Alu                        | -71502  | NM_001913 | 1523      | Hs.191482 | NM_001913    | HPRD:00295        |
| P493_merge_peak_201 | chr17       | 37017721  | 37018050  | Intergenic                            | Intergenic                            | -7832   | NM_000978 | 9349      | Hs.406300 | NM_000978    |                   |
| P493_merge_peak_230 | chr19       | 45540686  | 45540943  | exon (NM_006509, exon 11 of 11)       | exon (NM_006509, exon 11 of 11)       | -1484   | NM_001278 | 11129     | Hs.466917 | NM_007056    | HPRD:11552        |
| P493_merge_peak_10  | chr1        | 17222698  | 17222895  | Intergenic                            | Intergenic                            | -25649  | NM_014675 | 9696      | Hs.309403 | NM_014675    | HPRD:16758        |
| P493_merge_peak_183 | chr16       | 73512079  | 73512334  | Intergenic                            | Intergenic                            | 91502   | NR_038234 | 100506172 | Hs.434230 | NR_038234    | ENSG00000258779   |
| P493_merge_peak_184 | chr16       | 81849392  | 81849590  | intron (NM_002661, intron 1)          | AluS1 SINE Alu                        | 36628   | NM_002661 | 5336      | Hs.372303 | NM_002661    | HPRD:02570        |
| P493_merge_peak_262 | chr20       | 6727601   | 6727817   | Intergenic                            | MIR SINE MIR                          | -21036  | NM_001200 | 650       | Hs.73853  | NM_001200    | HPRD:00206        |
| P493_merge_peak_261 | chr20       | 4794955   | 4795175   | intron (NM_014737, intron 2 of 11)    | intron (NM_014737, intron 2 of 11)    | 704     | NM_170774 | 9770      | Hs.631504 | NM_014737    | HPRD:15218        |
| P493_merge_peak_13  | chr1        | 45272994  | 45273227  | promoter-TSS (NM_001013632)           | promoter-TSS (NM_001013632)           | -153    | NM_001013 | 343521    | Hs.585137 | NM_001013632 | HPRD:15762        |
| P493_merge_peak_472 | chrX        | 77359434  | 77359807  | promoter-TSS (NM_000291)              | promoter-TSS (NM_000291)              | -46     | NM_000291 | 5230      | Hs.78771  | NM_000291    | HPRD:02412        |
| P493_merge_peak_278 | chr4        | 10118453  | 10118719  | promoter-TSS (NM_017491)              | promoter-TSS (NM_017491)              | -13     | NM_017491 | 9948      | Hs.128548 | NM_005112    | HPRD:09199        |
| P493_merge_peak_176 | chr16       | 10959613  | 10959840  | Intergenic                            | MIR SINE MIR                          | -11329  | NM_000246 | 4261      | Hs.701991 | NM_000246    | HPRD:02475        |
| P493_merge_peak_38  | chr1        | 157696390 | 157696742 | Intergenic                            | ALU SINE Alu                          | -25919  | NM_052939 | 115352    | Hs.292449 | NM_052939    | HPRD:07352        |
| P493_merge_peak_269 | chr3        | 14186070  | 14186283  | TTS (NM_004628)                       | TTS (NM_004628)                       | 19736   | NM_024334 | 79188     | Hs.517817 | NM_024334    | HPRD:15541        |
| P493_merge_peak_451 | chr9        | 66971273  | 66971584  | Intergenic                            | ALR Alpha Satellite centr             | 48461   | NR_121570 | 101928381 | Hs.708866 | NR_121570    |                   |
| P493_merge_peak_174 | chr16       | 3243951   | 3244157   | Intergenic                            | Intergenic                            | -10193  | NM_012360 | 4992      | Hs.664502 | NM_012360    | HPRD:09125        |
| P493_merge_peak_12  | chr1        | 22225821  | 22226109  | intron (NM_00129186)                  | MIR SINE MIR                          | 37825   | NM_001291 | 3339      | Hs.562227 | NM_005529    | HPRD:08004        |
| P493_merge_peak_468 | chrUn_g1000 | 50836     | 51131     | NA                                    | BSR Beta Satellite Satellite          | NA      | NA        | NA        |           | NA           |                   |
| P493_merge_peak_97  | chr10       | 97026591  | 97026782  | intron (NM_020992, intron 3 of 6)     | intron (NM_020992, intron 3 of 6)     | 24219   | NM_020992 | 9124      | Hs.368525 | NM_020992    | HPRD:09326        |
| P493_merge_peak_441 | chr8        | 38627889  | 38628127  | intron (NM_001146216, intron 1 of 1)  | intron (NM_001146216, intron 1 of 1)  | -16714  | NM_001122 | 6867      | Hs.279245 | NM_006283    | HPRD:10391        |
| P493_merge_peak_175 | chr16       | 4666279   | 4666477   | Intergenic                            | CpG-8803                              | -1451   | NM_145253 | 124402    | Hs.513313 | NM_145253    | HPRD:14025        |
| P493_merge_peak_250 | chr19       | 58609681  | 58609912  | promoter-TSS (NM_001145544)           | promoter-TSS (NM_001145544)           | -66     | NM_023926 | 65982     | Hs.235390 | NM_023926    | HPRD:07802        |
| P493_merge_peak_207 | chr17       | 47647110  | 47647396  | intron (NR_103773, intron 1)          | AluS1 SINE Alu                        | 4173    | NR_103773 | 100288866 | Hs.720309 | NR_103773    | ENSG00000249906   |
| P493_merge_peak_187 | chr16       | 90183321  | 90183630  | Intergenic                            | Intergenic                            | -41137  | NM_001098 | 111       |           |              |                   |

|                     |             |           |           |                             |                                      |        |           |           |           |              |                 |
|---------------------|-------------|-----------|-----------|-----------------------------|--------------------------------------|--------|-----------|-----------|-----------|--------------|-----------------|
| P493_merge_peak_458 | chrUn_gl000 | 107285    | 107635    | non-coding (NR_046235)      | non-coding (NR_046235, exon 1 of 1)  | 2036   | NR_046235 | 100861532 |           | NR_046235    |                 |
| P493_merge_peak_459 | chrUn_gl000 | 112446    | 112664    | TTS (NR_003285)             | TTS (NR_003285)                      | 530    | NR_003285 | 100008587 |           | NR_003285    |                 |
| P493_merge_peak_277 | chr4        | 549003    | 549270    | Intergenic                  | (CCA)n Simple_repeat Simple_repe     | 56147  | NR_110293 | 54872     | Hs.7099   | NM_017733    | HPRD:07890      |
| P493_merge_peak_457 | chrUn_gl000 | 105470    | 106881    | non-coding (NR_046235)      | non-coding (NR_046235, exon 1 of 1)  | 751    | NR_046235 | 100861532 |           | NR_046235    |                 |
| P493_merge_peak_256 | chr2        | 92316222  | 92316692  | Intergenic                  | ALR Alpha Satellite centr            | 187298 | NR_027714 | 440888    | Hs.730239 | NM_001032412 | ENSG00000226481 |
| P493_merge_peak_425 | chr7        | 139119532 | 139119756 | Intergenic                  | MIRb SINE MIR                        | -7372  | NR_033999 | 100129148 | Hs.744449 | NR_033999    |                 |
| P493_merge_peak_188 | chr17       | 4046882   | 4047117   | promoter-TSS (NM_001254755) | promoter-TSS (NM_001254755)          | 84     | NM_001254 | 124936    | Hs.513871 | NM_144611    | HPRD:14549      |
| P493_merge_peak_461 | chrUn_gl000 | 114809    | 115085    | non-coding (NR_046235)      | non-coding (NR_046235, exon 1 of 1)  | 2922   | NR_003285 | 100008587 |           | NR_003285    |                 |
| P493_merge_peak_266 | chr21       | 44756214  | 44756441  | Intergenic                  | (CCA)n Simple_repeat Simple_repea    | -4408  | NR_103713 | 100126693 | Hs.473952 | NR_103713    |                 |
| P493_merge_peak_222 | chr19       | 7515638   | 7515869   | intron (NM_001130955)       | intron (NM_001130955, intron 5 of 1) | 11179  | NM_001130 | 23370     | Hs.465761 | NM_015318    | HPRD:12479      |
| P493_merge_peak_467 | chrUn_gl000 | 161256    | 161545    | Intergenic                  | LSU-rRNA_Hsa lRNA rRNA               | 5403   | NR_003285 | 100008587 |           | NR_003285    |                 |
| P493_merge_peak_279 | chr4        | 49151492  | 49151757  | Intergenic                  | (CATT)n Satellite Satellite          | 162965 | NM_001286 | 80157     | Hs.479703 | NM_025087    | HPRD:08638      |

Supplementary Table 6

| PeakID (cmd=annotatePeaks.pl hESC-1mc) | Chr   | Start     | End       | Annotation                    | Detailed Annotation           | Distance to TSS | Nearest Prom | Entrez ID | Nearest Uni | Nearest Refseq | Nearest Ensembl   |
|----------------------------------------|-------|-----------|-----------|-------------------------------|-------------------------------|-----------------|--------------|-----------|-------------|----------------|-------------------|
| hESC-1merge_in_peak_380                | chr6  | 28510653  | 28511152  | Intergenic                    | tRNA-Arg-GCA [tRNA] tRNA      | 17113           | NR_003996    | 2880      | Hs.248129   | NM_001509      | HPRD:11941        |
| hESC-1merge_in_peak_269                | chr5  | 672787    | 673286    | intron (NM_007030, intron)    | intron (NM_007030, intron)    | 20474           | NR_007030    | 11076     | Hs.481466   | NM_007030      | HPRD:18522        |
| hESC-1merge_in_peak_373                | chr6  | 27578904  | 27579403  | Intergenic                    | tRNA-Gln-CAA [tRNA] tRNA      | 16556           | NR_003519    | 8340      | Hs.137594   | NM_003519      | HPRD:11898        |
| hESC-1merge_in_peak_15                 | chr1  | 143879600 | 143880099 | Intergenic                    | tRNA-Asn-AAC [tRNA] tRNA      | 33294           | NR_007418    | 72833     | Hs.535577   | NM_007418      | ENSG00000215784   |
| hESC-1merge_in_peak_152                | chr15 | 79152174  | 79153213  | Intergenic                    | tRNA-Lys-AAG [tRNA] tRNA      | -12160          | NR_001265    | 10933     | Hs.374503   | NM_006791      | HPRD:09532        |
| hESC-1merge_in_peak_297                | chr6  | 26331441  | 26331940  | Intergenic                    | tRNA-Trp-TGG [tRNA] tRNA      | -33697          | NR_001197    | 11118     | Hs.376046   | NM_007047      | HPRD:12547        |
| hESC-1merge_in_peak_147                | chr15 | 45490578  | 45491077  | intron (NM_138356, intron)    | tRNA-His-CAY [tRNA] tRNA      | 2546            | NR_138356    | 90525     | Hs.310399   | NM_138356      | HPRD:14272        |
| hESC-1merge_in_peak_105                | chr11 | 75946643  | 75947142  | Intergenic                    | CpG                           | -29318          | NR_004626    | 7481      | Hs.108219   | NM_004626      | HPRD:04741        |
| hESC-1merge_in_peak_101                | chr11 | 66115390  | 66115889  | promoter-TSS (NM_006876)      | promoter-TSS (NM_006876)      | -478            | NR_006876    | 11041     | Hs.8526     | NM_006876      | HPRD:09270        |
| hESC-1merge_in_peak_77                 | chr1  | 228763754 | 228764253 | Intergenic                    | CpG                           | -16391          | NR_037962    | 58480     | Hs.647774   | NM_021205      | HPRD:06965        |
| hESC-1merge_in_peak_192                | chr17 | 8125933   | 8126432   | non-coding (NR_026951, ex)    | non-coding (NR_026951, ex)    | 1179            | NR_026951    | 284029    | Hs.121692   | NM_173621      | HPRD:08755        |
| hESC-1merge_in_peak_437                | chr7  | 149028022 | 149028521 | Intergenic                    | tRNA-Cys-TGY [tRNA] tRNA      | 45899           | NR_036573    | 155060    | Hs.490512   | NM_015357      | HPRD:17309        |
| hESC-1merge_in_peak_242                | chr2  | 43037473  | 43037972  | Intergenic                    | tRNA-Ile-ATA [tRNA] tRNA      | -17971          | NR_012205    | 23498     | Hs.368805   | NM_012205      | HPRD:05158        |
| hESC-1merge_in_peak_149                | chr15 | 45493162  | 45493661  | promoter-TSS (NM_138356)      | promoter-TSS (NM_138356)      | -38             | NR_138356    | 90525     | Hs.310399   | NM_138356      | HPRD:14272        |
| hESC-1merge_in_peak_108                | chr12 | 56583955  | 56584454  | promoter-TSS (NM_003075)      | promoter-TSS (NM_003075)      | -853            | NR_003075    | 6601      | Hs.236030   | NM_003075      | HPRD:03437        |
| hESC-1merge_in_peak_405                | chr6  | 28784771  | 28785270  | Intergenic                    | tRNA-Ala-GCA [tRNA] tRNA      | 46434           | NR_033379    | 401242    | Hs.448285   | NR_033379      | ENSG00000225595   |
| hESC-1merge_in_peak_468                | chrX  | 3756187   | 3756686   | intron (NR_034031, intron)    | CpG                           | 5499            | NR_034031    | 38996     | Hs.636199   | NR_034031      |                   |
| hESC-1merge_in_peak_274                | chr5  | 180524227 | 180524726 | Intergenic                    | tRNA-Leu-CYT [tRNA] tRNA      | 27828           | NR_001258    | 26693     | Hs.742585   | NM_001258283   | ENSG00000185372   |
| hESC-1merge_in_peak_160                | chr16 | 3207160   | 3207659   | Intergenic                    | tRNA-Lys-AAG [tRNA] tRNA      | 22275           | NR_001134    | 7760      | Hs.115284   | NM_004220      | HPRD:12224        |
| hESC-1merge_in_peak_305                | chr6  | 26556560  | 26557059  | Intergenic                    | tRNA-Lys-AAG [tRNA] tRNA      | 18237           | NR_006353    | 10473     | Hs.236774   | NM_006353      |                   |
| hESC-1merge_in_peak_360                | chr6  | 27589536  | 27586435  | Intergenic                    | tRNA-Thr-ACA [tRNA] tRNA      | -75629          | NR_038293    | 100507173 | Hs.635987   | NR_038292      |                   |
| hESC-1merge_in_peak_187                | chr17 | 8089467   | 8089966   | promoter-TSS (NR_039746)      | promoter-TSS (NR_039746)      | -547            | NR_039746    | 100616406 |             | NR_039746      |                   |
| hESC-1merge_in_peak_143                | chr14 | 102783227 | 102783726 | promoter-TSS (NM_001267)      | promoter-TSS (NM_001267)      | -238            | NR_001267    | 55778     | Hs.743359   | NM_001267      | HPRD:18532        |
| hESC-1merge_in_peak_128                | chr14 | 21125406  | 21125905  | Intergenic                    | tRNA-Tyr-TAC [tRNA] tRNA      | -15805          | NR_001001    | 341799    | Hs.513132   | NM_00101968    | HPRD:17779        |
| hESC-1merge_in_peak_275                | chr5  | 180528641 | 180529140 | Intergenic                    | tRNA-Leu-CYT [tRNA] tRNA      | 23414           | NR_001258    | 26693     | Hs.742585   | NM_001258283   | ENSG00000185372   |
| hESC-1merge_in_peak_289                | chr6  | 26305481  | 26305980  | Intergenic                    | tRNA-Ser-AGY [tRNA] tRNA      | -20003          | NR_003543    | 8365      | Hs.591790   | NM_003543      | HPRD:11919        |
| hESC-1merge_in_peak_432                | chr7  | 148638369 | 148638868 | Intergenic                    | HY5 [scRNA] scRNA             | -57177          | NR_001203    | 2146      | Hs.444082   | NM_004456      | HPRD:03342        |
| hESC-1merge_in_peak_450                | chr8  | 67026216  | 67026715  | Intergenic                    | tRNA-Ala-GCY [tRNA] tRNA      | -12813          | NR_184087    | 84675     | Hs.85524    | NM_030558      | HPRD:05927        |
| hESC-1merge_in_peak_30                 | chr1  | 147825493 | 147825992 | intron (NR_102404, intron)    | tRNA-Gln-CAG [tRNA] tRNA      | -19604          | NR_049810    | 100847044 |             | NR_049810      |                   |
| hESC-1merge_in_peak_409                | chr6  | 28863789  | 28864288  | promoter-TSS (NR_104117)      | promoter-TSS (NR_104117)      | -269            | NR_104117    | 414760    | Hs.211005   | NR_104117      |                   |
| hESC-1merge_in_peak_323                | chr6  | 26780611  | 26781110  | Intergenic                    | tRNA-Ile-ATT [tRNA] tRNA      | -120880         | NR_001242    | 79692     | Hs.126280   | NM_002469      |                   |
| hESC-1merge_in_peak_34                 | chr1  | 148760124 | 148760623 | intron (NR_104217, intron)    | tRNA-Asn-AAC [tRNA] tRNA      | -45642          | NR_001144    | 73062     |             | NR_001144032   |                   |
| hESC-1merge_in_peak_183                | chr17 | 8023414   | 8023913   | TTS (NM_032580)               | TTS (NM_032580)               | -1429           | NR_001165    | 59344     | Hs.232770   | NM_001218      | HPRD:06231        |
| hESC-1merge_in_peak_332                | chr6  | 27198057  | 27198556  | Intergenic                    | Intergenic                    | -17196          | NR_005865    | 10279     | Hs.274407   | NM_005865      | HPRD:06205        |
| hESC-1merge_in_peak_23                 | chr1  | 147504821 | 147505320 | Intergenic                    | tRNA-Gln-CAG [tRNA] tRNA      | -17882          | NR_111936    | 100034743 | Hs.696575   | NR_003377      | ENSG00000215860   |
| hESC-1merge_in_peak_394                | chr6  | 28696890  | 28697389  | Intergenic                    | tRNA-Ala-GCY [tRNA] tRNA      | 134315          | NR_033379    | 401242    | Hs.448285   | NR_033379      | HPRD:06965        |
| hESC-1merge_in_peak_327                | chr6  | 27125701  | 27126200  | Intergenic                    | tRNA-His-CAY [tRNA] tRNA      | 10545           | NR_036096    | 100422934 |             | NR_036096      | miRBase:MI0014167 |
| hESC-1merge_in_peak_271                | chr5  | 135415987 | 135416486 | promoter-TSS (NR_030583)      | promoter-TSS (NR_030583)      | 50              | NR_030583    | 100126299 |             | NR_030583      | ENSG00000207123   |
| hESC-1merge_in_peak_417                | chr6  | 28956603  | 28957102  | Intergenic                    | tRNA-Leu-CYT [tRNA] tRNA      | 16185           | NR_001010    | 282890    | Hs.148218   | NM_001010877   | HPRD:18325        |
| hESC-1merge_in_peak_174                | chr16 | 57334181  | 57334680  | Intergenic                    | tRNA-Leu-CYT [tRNA] tRNA      | -15846          | NR_015993    | 51090     | Hs.632215   | NM_015993      | HPRD:11854        |
| hESC-1merge_in_peak_113                | chr12 | 125411656 | 125412155 | Intergenic                    | tRNA-Asp-GAY [tRNA] tRNA      | 11812           | NR_049820    | 100847004 |             | NR_049820      | miRBase:MI0018167 |
| hESC-1merge_in_peak_266                | chr4  | 146808161 | 146808660 | intron (NM_178835, intron)    | MIR [SINE] MIR                | 51197           | NR_178835    | 152485    | Hs.633543   | NM_178835      | HPRD:14095        |
| hESC-1merge_in_peak_76                 | chr1  | 228761416 | 228761915 | Intergenic                    | CpG                           | -18729          | NR_037962    | 58480     | Hs.647774   | NM_021205      | HPRD:06965        |
| hESC-1merge_in_peak_42                 | chr1  | 16089550  | 160896049 | Intergenic                    | tRNA-Glu-GAA [tRNA] tRNA      | -6456           | NR_110695    | 101928372 |             | NR_110695      | ENSG00000198358   |
| hESC-1merge_in_peak_315                | chr6  | 26721019  | 26721518  | Intergenic                    | tRNA-Ile-ATT [tRNA] tRNA      | -61288          | NR_001242    | 79692     | Hs.126280   | NR_001242      |                   |
| hESC-1merge_in_peak_292                | chr6  | 26313132  | 26313631  | Intergenic                    | tRNA-Met-I [tRNA] tRNA        | -27654          | NR_003543    | 8365      | Hs.591790   | NM_003543      | HPRD:11919        |
| hESC-1merge_in_peak_169                | chr16 | 9077645   | 9078144   | Intergenic                    | AluX [SINE] Alu               | -20554          | NR_003470    | 7874      | Hs.386939   | NM_003470      | HPRD:03950        |
| hESC-1merge_in_peak_285                | chr5  | 180648747 | 180649246 | TTS (NR_039781)               | TTS (NR_039781)               | 637             | NR_039781    | 100616342 |             | NR_039781      | miRBase:MI0017265 |
| hESC-1merge_in_peak_229                | chr19 | 50610064  | 50610563  | promoter-TSS (NR_024228)      | promoter-TSS (NR_024228)      | 78              | NR_024226    | 100169955 | Hs.723094   | NR_024226      |                   |
| hESC-1merge_in_peak_377                | chr6  | 28442117  | 28442616  | Intergenic                    | tRNA-Thr-ACG [tRNA] tRNA      | -31087          | NR_001012    | 222696    | Hs.721841   | NR_001012455   | ENSG00000187987   |
| hESC-1merge_in_peak_303                | chr6  | 26554143  | 26554642  | Intergenic                    | tRNA-Ile-ATT [tRNA] tRNA      | 15820           | NR_006353    | 10473     | Hs.236774   | NM_006353      |                   |
| hESC-1merge_in_peak_156                | chr15 | 93963224  | 93963723  | Intergenic                    | Intergenic                    | -331030         | NR_020211    | 56963     | Hs.271277   | NM_020211      | HPRD:09560        |
| hESC-1merge_in_peak_391                | chr6  | 28678168  | 28678667  | Intergenic                    | tRNA-Ala-GCY [tRNA] tRNA      | -123305         | NR_052923    | 114821    | Hs.176980   | NM_052923      | HPRD:11720        |
| hESC-1merge_in_peak_357                | chr6  | 27560384  | 27560883  | Intergenic                    | tRNA-Met-I [tRNA] tRNA        | -101181         | NR_038293    | 100507173 | Hs.635987   | NR_038292      |                   |
| hESC-1merge_in_peak_385                | chr6  | 28611026  | 28611525  | Intergenic                    | tRNA-Ala-GCG [tRNA] tRNA      | -56163          | NR_052923    | 114821    | Hs.176980   | NM_052923      | HPRD:11720        |
| hESC-1merge_in_peak_381                | chr6  | 28556953  | 28557452  | Intergenic                    | tRNA-Gln-CAA [tRNA] tRNA      | -2090           | NR_052923    | 114821    | Hs.176980   | NM_052923      | HPRD:11720        |
| hESC-1merge_in_peak_261                | chr4  | 49093742  | 49094241  | Intergenic                    | [CATCT] Satellite [Satellite] | 105332          | NR_001286    | 80157     | Hs.479703   | NM_0025087     | HPRD:08638        |
| hESC-1merge_in_peak_173                | chr16 | 22309589  | 22310088  | intron (NM_001258035, intron) | MIR [SINE] MIR                | 11442           | NR_001258    | 55718     | Hs.460298   | NM_001258      | HPRD:15155        |
| hESC-1merge_in_peak_97                 | chr11 | 59324751  | 59325250  | Intergenic                    | tRNA-Phe-TTY [tRNA] tRNA      | 37631           | NR_036120    | 100422880 |             | NR_036120      |                   |
| hESC-1merge_in_peak_270                | chr5  | 72378654  | 72379153  | intron (NM_001146032, intron) | AluY [SINE] Alu               | -37485          | NR_001161    | 134285    | Hs.162246   | NM_001161      | HPRD:14057        |
| hESC-1merge_in_peak_218                | chr19 | 48407313  | 48407812  | Intergenic                    | AluY [SINE] Alu               | -3373           | NR_004437    | 100126800 | Hs.707967   | NR_004437      |                   |
| hESC-1merge_in_peak_125                | chr14 | 21099086  | 21099585  | Intergenic                    | tRNA-Thr-ACA [tRNA] tRNA      | 10515           | NR_001001    | 341799    | Hs.513132   | NM_00101968    | HPRD:17779        |
| hESC-1merge_in_peak_110                | chr12 | 98897073  | 98897572  | intron (NR_038383, intron)    | tRNA-Asp-GAY [tRNA] tRNA      | 311             | NR_038383    | 643770    | Hs.129589   | NR_038383      | ENSG00000245017   |
| hESC-1merge_in_peak_451                | chr8  | 96281653  | 96282152  | promoter-TSS (NM_177965)      | promoter-TSS (NM_177965)      | -440            | NR_177965    | 157657    | Hs.548157   | NR_177965      | HPRD:14104        |
| hESC-1merge_in_peak_230                | chr19 | 50615425  | 50615924  | promoter-TSS (NR_024228)      | promoter-TSS (NR_024228)      | 71              | NR_024226    | 100169955 | Hs.723094   | NR_024226      |                   |
| hESC-1merge_in_peak_85                 | chr1  | 228781570 | 228782069 | intron (NR_037962, intron)    | CpG-2319                      | 1162            | NR_002834    | 574029    | Hs.647774   | NR_002834      |                   |
| hESC-1merge_in_peak_75                 | chr1  | 228759198 | 228759697 | Intergenic                    | CpG                           | -20947          | NR_037962    | 58480     | Hs.647774   | NM_021205      | HPRD:06965        |
| hESC-1merge_in_peak_52                 | chr1  | 161425170 | 161425669 | Intergenic                    | CpG                           | -49786          | NR_021642    | 2212      | Hs.352642   | NM_021642      | HPRD:09096        |
| hESC-1merge_in_peak_447                | chr7  | 158885171 | 158882070 | intron (NM_003382, intron)    | intron (NM_003382, intron)    | 55829           | NR_003382    | 7434      | Hs.580552   | NM_003382      | HPRD:03576        |
| hESC-1merge_in_peak_67                 | chr1  | 204475428 | 204475927 | Intergenic                    | tRNA-Lys-AAI [tRNA] tRNA      | -9830           | NR_001278    | 4194      | Hs.497492   | NM_002393      | HPRD:04082        |
| hESC-1merge_in_peak_12                 | chr1  | 34943280  | 34943779  | Intergenic                    | MIR [SINE] MIR                | -277119         | NR_005268    | 2709      | Hs.198249   | NM_005268      | HPRD:06840        |
| hESC-1merge_in_peak_352                | chr6  | 27520962  | 27521461  | Intergenic                    | tRNA-Ser-TCY [tRNA] tRNA      | -80314          | NR_007149    | 7738      | Hs.158174   | NM_007149      | HPRD:03785        |
| hESC-1merge_in_peak_444                | chr7  | 149361710 | 149362209 | Intergenic                    | tRNA-Cys-TGY [tRNA] tRNA      | -40078          | NR_027789    | 79970     | Hs.520785   | NM_024910      | HPRD:07791        |
| hESC-1merge_in_peak_170                | chr16 | 14379556  | 14380055  | Intergenic                    | tRNA-Thr-ACG [tRNA] tRNA      | -18019          | NR_030177    | 574455</  |             |                |                   |



|                           |       |           |           |                                |                                |          |           |           |           |                   |
|---------------------------|-------|-----------|-----------|--------------------------------|--------------------------------|----------|-----------|-----------|-----------|-------------------|
| hESC-Imerge_insp_peak_8   | chr1  | 17198997  | 17199396  | Intergenic                     | CpG                            | -13630   | NR_037446 | 100500876 | NR_037446 | miRBase:M10016076 |
| hESC-Imerge_insp_peak_28  | chr1  | 147775436 | 147775935 | intron (NR_102404, intron 1)   | intron (NR_102404, intron 1)   | 30993    | NR_049810 | 100847044 | NR_049810 |                   |
| hESC-Imerge_insp_peak_20  | chr1  | 145963071 | 145963570 | intron (NR_104217, intron 1)   | tRNA-Gln-CAG tRNA tRNA         | -17843   | NR_111936 | 100034743 | Hs.696575 | NR_003377         |
| hESC-Imerge_insp_peak_296 | chr6  | 26330303  | 26330802  | Intergenic                     | tRNA-Met-[tRNA]                | -34835   | NR_001197 | 11118     | Hs.376046 | NR_007047         |
| hESC-Imerge_insp_peak_402 | chr6  | 28770369  | 28770868  | Intergenic                     | tRNA-Ala-GCA tRNA tRNA         | 60836    | NR_033379 | 401242    | Hs.448285 | NR_033379         |
| hESC-Imerge_insp_peak_361 | chr6  | 27598997  | 27599496  | Intergenic                     | tRNA-Ile-ATA tRNA tRNA         | -625689  | NR_038293 | 100507173 | Hs.635987 | NR_038293         |
| hESC-Imerge_insp_peak_153 | chr15 | 80036776  | 80037275  | Intergenic                     | tRNA-Cys-TGY tRNA tRNA         | 152314   | NR_037654 | 10588     | Hs.194294 | NR_006441         |
| hESC-Imerge_insp_peak_13  | chr1  | 61523149  | 61523648  | Intergenic                     | AluSq2 SINE Alu                | -19548   | NR_001145 | 4774      | Hs.740757 | NR_005595         |
| hESC-Imerge_insp_peak_383 | chr6  | 28574724  | 28575223  | Intergenic                     | tRNA-Ala-GCY tRNA tRNA         | -19861   | NR_052923 | 114821    | Hs.176980 | NR_052923         |
| hESC-Imerge_insp_peak_369 | chr6  | 27688705  | 27689204  | Intergenic                     | tRNA-Leu-TTA tRNA tRNA         | 27096    | NR_038292 | 100507173 | Hs.635987 | NR_038292         |
| hESC-Imerge_insp_peak_102 | chr11 | 66189043  | 66189542  | intron (NM_178864, intron 1)   | CpG                            | 817      | NR_178864 | 266743    | Hs.256036 | NR_178864         |
| hESC-Imerge_insp_peak_264 | chr4  | 88284632  | 88285131  | intron (NM_016245, intron 1)   | MER41-int LTR ERV1             | 27574    | NR_016245 | 51170     | Hs.594923 | NR_016245         |
| hESC-Imerge_insp_peak_120 | chr14 | 21077284  | 21077783  | Intergenic                     | tRNA-Pro-CYC tRNA tRNA         | -18551   | NR_001024 | 493901    | Hs.729466 | NR_001024         |
| hESC-Imerge_insp_peak_326 | chr6  | 27064890  | 27065389  | Intergenic                     | tRNA-Ser-AGY tRNA tRNA         | 35436    | NR_021058 | 8970      | Hs.591807 | NR_021058         |
| hESC-Imerge_insp_peak_293 | chr6  | 26319076  | 26319575  | Intergenic                     | Intergenic                     | -33598   | NR_003543 | 8365      | Hs.591790 | NR_003543         |
| hESC-Imerge_insp_peak_322 | chr6  | 26773560  | 26774059  | Intergenic                     | tRNA-Ala-GCY tRNA tRNA         | -113829  | NR_001242 | 79692     | Hs.126280 | NR_024639         |
| hESC-Imerge_insp_peak_182 | chr17 | 8022863   | 8023362   | promoter-TSS (NM_001165)       | promoter-TSS (NM_001165)       | -878     | NR_001165 | 59344     | Hs.232770 | NR_021628         |
| hESC-Imerge_insp_peak_412 | chr6  | 28912152  | 28912651  | TTS (NR_103538).5              | TTS (NR_103538).5              | 840      | NR_103538 | 729583    | Hs.453549 | NR_103538         |
| hESC-Imerge_insp_peak_456 | chr9  | 66457928  | 66458427  | intron (NR_121647, intron 1)   | CpG                            | 888      | NR_121647 | 103352539 | Hs.351215 | NR_121647         |
| hESC-Imerge_insp_peak_207 | chr17 | 73029787  | 73030286  | intron (NR_110835, intron 1)   | tRNA-Arg-AGG tRNA tRNA         | 1374     | NR_110835 | 23510     | Hs.514468 | NR_015353         |
| hESC-Imerge_insp_peak_118 | chr13 | 95201693  | 95202192  | Intergenic                     | CpG                            | 46569    | NR_014305 | 23483     | Hs.12393  | NR_014305         |
| hESC-Imerge_insp_peak_424 | chr7  | 13872904  | 13873403  | Intergenic                     | AluXs3 SINE Alu                | -152986  | NR_001163 | 2115      | Hs.22634  | NR_004956         |
| hESC-Imerge_insp_peak_70  | chr1  | 228748040 | 228748539 | Intergenic                     | CpG                            | -32105   | NR_037962 | 58480     | Hs.647774 | NR_021205         |
| hESC-Imerge_insp_peak_348 | chr6  | 27473375  | 27473874  | Intergenic                     | tRNA-Ser-TCA tRNA tRNA         | -32727   | NR_007149 | 7738      | Hs.158174 | NR_007149         |
| hESC-Imerge_insp_peak_164 | chr16 | 3230348   | 32303937  | Intergenic                     | tRNA-Lys-AGA tRNA tRNA         | -23650   | NR_012360 | 4992      | Hs.664502 | NR_012360         |
| hESC-Imerge_insp_peak_50  | chr1  | 161420260 | 161420759 | Intergenic                     | CpG                            | -54696   | NR_021642 | 2212      | Hs.352642 | NR_021642         |
| hESC-Imerge_insp_peak_95  | chr11 | 59319043  | 59319542  | Intergenic                     | tRNA-Leu-TTA tRNA tRNA         | 36906    | NR_001004 | 390199    | Hs.553757 | NR_001004         |
| hESC-Imerge_insp_peak_124 | chr14 | 21098378  | 21098877  | Intergenic                     | tRNA-Tyr-TAC tRNA tRNA         | 11223    | NR_001001 | 341799    | Hs.513132 | NR_001001         |
| hESC-Imerge_insp_peak_24  | chr1  | 147520528 | 147521027 | Intergenic                     | tRNA-Asn-AAC tRNA tRNA         | -33589   | NR_111936 | 100034743 | Hs.696575 | NR_003377         |
| hESC-Imerge_insp_peak_392 | chr6  | 28673262  | 28673761  | Intergenic                     | Intergenic                     | -132463  | NR_052923 | 114821    | Hs.176980 | NR_052923         |
| hESC-Imerge_insp_peak_414 | chr6  | 28920806  | 28921305  | Intergenic                     | tRNA-Met tRNA tRNA             | 9494     | NR_103538 | 729583    | Hs.453549 | NR_103538         |
| hESC-Imerge_insp_peak_80  | chr1  | 228770420 | 228770919 | Intergenic                     | CpG                            | -9725    | NR_037962 | 58480     | Hs.647774 | NR_021205         |
| hESC-Imerge_insp_peak_388 | chr6  | 28641388  | 28641887  | Intergenic                     | tRNA-Ala-GCG tRNA tRNA         | -86525   | NR_052923 | 114821    | Hs.176980 | NR_052923         |
| hESC-Imerge_insp_peak_265 | chr4  | 124429778 | 124430277 | Intergenic                     | tRNA-Cys-TGY tRNA tRNA         | 109382   | NR_005841 | 10252     | Hs.744854 | NR_005841         |
| hESC-Imerge_insp_peak_418 | chr6  | 52860339  | 52860838  | promoter-TSS (NM_001512)       | promoter-TSS (NM_001512)       | -410     | NR_001512 | 2941      | Hs.485557 | NR_001512         |
| hESC-Imerge_insp_peak_362 | chr6  | 27618468  | 27618967  | Intergenic                     | tRNA-Val-GTY tRNA tRNA         | -4309    | NR_038293 | 100507173 | Hs.635987 | NR_038292         |
| hESC-Imerge_insp_peak_109 | chr12 | 96429593  | 96430092  | promoter-TSS (NM_000895)       | promoter-TSS (NM_000895)       | -403     | NR_000895 | 4048      | Hs.524648 | NR_000895         |
| hESC-Imerge_insp_peak_272 | chr5  | 14009678  | 14009177  | promoter-TSS (NR_026703)       | promoter-TSS (NR_026703)       | 66       | NR_026703 | 56664     | NR_026703 | ENSG00000199990   |
| hESC-Imerge_insp_peak_43  | chr1  | 161369248 | 161369747 | Intergenic                     | CpG                            | -31824   | NR_001013 | 25717     | Hs.534593 | NR_001013         |
| hESC-Imerge_insp_peak_98  | chr11 | 59327598  | 59328097  | Intergenic                     | tRNA-Lys-AAA tRNA tRNA         | 34784    | NR_036120 | 100422880 | NR_036120 |                   |
| hESC-Imerge_insp_peak_159 | chr16 | 3202680   | 3203179   | Intergenic                     | tRNA-Arg-AGG tRNA tRNA         | 17795    | NR_001134 | 7760      | Hs.115284 | NR_004420         |
| hESC-Imerge_insp_peak_213 | chr19 | 1383350   | 1383849   | promoter-TSS (NM_024407)       | promoter-TSS (NM_024407)       | -284     | NR_024407 | 374291    | Hs.211914 | NR_024407         |
| hESC-Imerge_insp_peak_129 | chr14 | 21131146  | 21131645  | Intergenic                     | tRNA-Tyr-TAC tRNA tRNA         | -20941   | NR_001145 | 283       | Hs.283749 | NR_001145         |
| hESC-Imerge_insp_peak_370 | chr6  | 27694250  | 27694749  | Intergenic                     | tRNA-Thr-ACC tRNA tRNA         | 32641    | NR_038292 | 100507173 | Hs.635987 | NR_038292         |
| hESC-Imerge_insp_peak_448 | chr8  | 26046748  | 26047247  | Intergenic                     | AluXs1 SINE Alu                | -102010  | NR_002717 | 5520      | Hs.146339 | NR_002717         |
| hESC-Imerge_insp_peak_193 | chr17 | 8129720   | 8130219   | non-coding (NR_046431, exon 1) | non-coding (NR_046431, exon 1) | -2608    | NR_026951 | 284029    | Hs.121692 | NR_176221         |
| hESC-Imerge_insp_peak_157 | chr16 | 686515    | 687014    | promoter-TSS (NM_032366)       | promoter-TSS (NM_032366)       | -398     | NR_109979 | 84326     | Hs.239500 | NR_032366         |
| hESC-Imerge_insp_peak_146 | chr15 | 40888812  | 40888311  | promoter-TSS (NM_144508)       | promoter-TSS (NM_144508)       | -386     | NR_170589 | 57082     | Hs.181855 | NR_144508         |
| hESC-Imerge_insp_peak_132 | chr14 | 21151966  | 21152465  | promoter-TSS (NM_001145)       | promoter-TSS (NM_001145)       | -121     | NR_001145 | 283       | Hs.283749 | NR_001145         |
| hESC-Imerge_insp_peak_286 | chr6  | 10523175  | 10523674  | intron (NM_145649, intron 1)   | AluSq2 SINE Alu                | 1856     | NR_145649 | 2651      | Hs.519884 | NR_001491         |
| hESC-Imerge_insp_peak_441 | chr7  | 14924399  | 14924898  | TTS (NR_027789)                | TTS (NR_027789)                | -48750   | NR_152557 | 155061    | Hs.24664  | NR_152557         |
| hESC-Imerge_insp_peak_372 | chr6  | 27745459  | 27745958  | Intergenic                     | tRNA-Met tRNA tRNA             | 16185    | NR_038292 | 100131289 | Hs.200573 | NR_038292         |
| hESC-Imerge_insp_peak_216 | chr19 | 18392357  | 18392856  | promoter-TSS (NR_036155)       | promoter-TSS (NR_036155)       | -140     | NR_001286 | 3727      | Hs.2780   | NR_005354         |
| hESC-Imerge_insp_peak_406 | chr6  | 28892357  | 28892856  | Intergenic                     | tRNA-Ala-GCY tRNA tRNA         | 25202    | NR_033379 | 401242    | Hs.448285 | NR_033379         |
| hESC-Imerge_insp_peak_318 | chr6  | 26735318  | 26735817  | Intergenic                     | Intergenic                     | -75587   | NR_001242 | 79692     | Hs.126280 | NR_024639         |
| hESC-Imerge_insp_peak_365 | chr6  | 27640018  | 27640517  | Intergenic                     | tRNA-Thr-TGC tRNA tRNA         | -21547   | NR_038293 | 100507173 | Hs.635987 | NR_038292         |
| hESC-Imerge_insp_peak_302 | chr6  | 26553506  | 26554005  | Intergenic                     | tRNA-Ala-GCG tRNA tRNA         | 15183    | NR_006353 | 10473     | Hs.236774 | NR_006353         |
| hESC-Imerge_insp_peak_307 | chr1  | 149664118 | 149664617 | intron (NR_111957, intron 1)   | tRNA-Glu-GAA tRNA tRNA         | 58450    | NR_125392 | 101954268 | NR_125392 |                   |
| hESC-Imerge_insp_peak_307 | chr6  | 26571890  | 26572389  | Intergenic                     | tRNA-Ala-GCY tRNA tRNA         | -25032   | NR_013375 | 29777     | Hs.254406 | NR_013375         |
| hESC-Imerge_insp_peak_71  | chr1  | 228750286 | 228750785 | Intergenic                     | CpG                            | -29859   | NR_037962 | 58480     | Hs.647774 | NR_021205         |
| hESC-Imerge_insp_peak_438 | chr7  | 149052545 | 149053044 | Intergenic                     | tRNA-Cys-TGY tRNA tRNA         | 70422    | NR_036573 | 155060    | Hs.490512 | NR_015357         |
| hESC-Imerge_insp_peak_162 | chr16 | 3221826   | 3222325   | Intergenic                     | tRNA-Pro-CCG tRNA tRNA         | -32172   | NR_012360 | 4992      | Hs.664502 | NR_012360         |
| hESC-Imerge_insp_peak_51  | chr1  | 161424139 | 161424638 | Intergenic                     | CpG                            | -50817   | NR_021642 | 2212      | Hs.352642 | NR_021642         |
| hESC-Imerge_insp_peak_325 | chr6  | 27059318  | 27059817  | Intergenic                     | tRNA-Pro-CGG tRNA tRNA         | 41008    | NR_021058 | 8970      | Hs.591807 | NR_021058         |
| hESC-Imerge_insp_peak_281 | chr5  | 180618468 | 180618967 | intron (NR_108031, intron 1)   | CpG-21583                      | 191      | NR_108031 | 102577426 | Hs.273759 | NR_108031         |
| hESC-Imerge_insp_peak_68  | chr1  | 222638149 | 222638648 | Intergenic                     | tRNA-Thr-ACA tRNA tRNA         | 83046    | NR_024746 | 79802     | Hs.665660 | NR_024746         |
| hESC-Imerge_insp_peak_427 | chr7  | 99067121  | 99067620  | Intergenic                     | tRNA-Trp-TGG tRNA tRNA         | -3145    | NR_001013 | 285989    | Hs.440384 | NR_213603         |
| hESC-Imerge_insp_peak_228 | chr19 | 50607012  | 50607511  | intron (NR_024215, intron 1)   | promoter-TSS (NR_024215)       | 71       | NR_024229 | 100170216 | Hs.723094 | NR_024229         |
| hESC-Imerge_insp_peak_111 | chr12 | 98897822  | 98898321  | promoter-TSS (NR_038383)       | promoter-TSS (NR_038383)       | -438     | NR_038383 | 643770    | Hs.129589 | NR_038383         |
| hESC-Imerge_insp_peak_452 | chr8  | 12227315  | 12227814  | Intergenic                     | Intergenic                     | -3782035 | NR_002835 | 594842    | Hs.668686 | NR_002835         |
| hESC-Imerge_insp_peak_358 | chr6  | 2750138   | 27501887  | Intergenic                     | tRNA-Leu-TTG tRNA tRNA         | -91427   | NR_038293 | 100507173 | Hs.635987 | NR_038292         |
| hESC-Imerge_insp_peak_219 | chr19 | 48421457  | 48421956  | promoter-TSS (NR_004436)       | promoter-TSS (NR_004436)       | 20       | NR_004435 | 100126798 | Hs.579631 | NR_004435         |
| hESC-Imerge_insp_peak_246 | chr2  | 206628532 | 206629031 | intron (NM_003872, intron 1)   | intron (NM_003872, intron 1)   | 81557    | NR_02164  | 8828      | Hs.471200 | NR_003872         |
| hESC-Imerge_insp_peak_25  | chr1  | 147737139 | 147737638 | intron (NR_102404, intron 1)   | tRNA-Gln-CAG tRNA tRNA         | -18046   | NR_120331 | 101927468 | Hs.515867 | NR_120331         |
| hESC-Imerge_insp_peak_171 | chr16 | 22206818  | 22207317  | Intergenic                     | tRNA-Leu-CTA tRNA tRNA         | -10525   | NR_013302 | 29904     | Hs.498892 | NR_013302         |
| hESC-Imerge_insp_peak_121 | chr14 | 21078091  | 21078590  | Intergenic                     | tRNA-Leu-CYT tRNA tRNA         | -19358   | NR_001024 | 493901    | Hs.729466 | NR_001024         |
| hESC-Imerge_insp_peak_212 | chr19 | 1021332   | 1021381   | promoter-TSS (NM_033420)       | promoter-TSS (NM_033420)       | 60       | NR_125730 | 103625684 | NR_125730 |                   |
| hESC-Imerge_insp_peak_473 | chrY  | 438075    | 438574    | Intergenic                     | L1MC4 LINE L1                  | -96755   | NR_006883 | 6473      | Hs.105932 | NR_100570         |
| hESC-Imerge_insp_peak_140 | chr14 | 73429468  | 73429967  | Intergenic                     | tRNA-Cys-TGY tRNA tRNA         | 23947    | NR_178441 | 53349     | Hs.335106 | NR_012160         |
| hESC-Imerge_insp_peak_252 | chr3  | 45730257  | 45730756  | promoter-TSS (NM_014016)       | promoter-TSS (NM_014016)       | -132     | NR_033947 | 644714    | Hs.712889 | NR_033947         |
| hESC-Imerge_insp_peak_154 |       |           |           |                                |                                |          |           |           |           |                   |

|                           |             |           |           |                            |                           |         |           |           |           |                   |                  |
|---------------------------|-------------|-----------|-----------|----------------------------|---------------------------|---------|-----------|-----------|-----------|-------------------|------------------|
| hESC-Imerge_insp_peak_400 | chr6        | 28758287  | 28758786  | Intergenic                 | tRNA-Phe-TTY tRNA tRNA    | 72918   | NR_033379 | 401242    | Hs.448285 | NR_033379         | ENSG00000225595  |
| hESC-Imerge_insp_peak_163 | chr16       | 3225512   | 3226011   | Intergenic                 | tRNA-Lys-AAG tRNA tRNA    | -28486  | NM_012360 | 4992      | Hs.664502 | NM_012360         | HPRD:09125       |
| hESC-Imerge_insp_peak_295 | chr6        | 26327624  | 26328123  | Intergenic                 | tRNA-Ser-TCY tRNA tRNA    | -37514  | NM_001197 | 11118     | Hs.376046 | NM_007047         | HPRD:12547       |
| hESC-Imerge_insp_peak_335 | chr6        | 27247827  | 27248326  | Intergenic                 | tRNA-Val-GGT tRNA tRNA    | 31935   | NM_033482 | 94026     | Hs.729955 | NM_033482         | ENSG00000158553  |
| hESC-Imerge_insp_peak_178 | chr16       | 71460193  | 71460692  | Intergenic                 | tRNA-Met tRNA tRNA        | 35675   | NM_145911 | 7571      | Hs.656643 | NM_145911         | HPRD:01915       |
| hESC-Imerge_insp_peak_244 | chr2        | 131094481 | 131094980 | TTS (NM_032357)            | TTS (NM_032357)           | 5226    | NM_032357 | 84317     | Hs.102403 | NM_032357         | HPRD:14428       |
| hESC-Imerge_insp_peak_419 | chr6        | 58142387  | 58142886  | Intergenic                 | tRNA-Ala-GCY tRNA tRNA    | 145088  | NR_125729 | 375513    | Hs.561539 | NM_206908         | HPRD:14428       |
| hESC-Imerge_insp_peak_133 | chr14       | 22025508  | 22026007  | Intergenic                 | Intergenic                | 13118   | NM_001005 | 26533     | Hs.554581 | NM_001005465      | HPRD:14888       |
| hESC-Imerge_insp_peak_201 | chr17       | 37025336  | 37025835  | promoter-TSS (NM_006148)   | promoter-TSS (NM_006148)  | -527    | NR_073384 | 3927      | Hs.741156 | NM_006148         | HPRD:04229       |
| hESC-Imerge_insp_peak_141 | chr14       | 75725691  | 75726190  | Intergenic                 | CpG                       | -19541  | NM_005252 | 2353      | Hs.25647  | NM_005252         | HPRD:01275       |
| hESC-Imerge_insp_peak_440 | chr7        | 149112000 | 149112499 | Intergenic                 | tRNA-Cys-TGY tRNA tRNA    | 45804   | NM_015694 | 27153     | Hs.38512  | NM_015694         | HPRD:13849       |
| hESC-Imerge_insp_peak_194 | chr17       | 9860109   | 9860608   | intron (NM_201433, intron) | MIR SINE SINE             | 2408    | NM_003644 | 8522      | Hs.462214 | NM_003644         | HPRD:16011       |
| hESC-Imerge_insp_peak_181 | chr17       | 8022264   | 8022763   | promoter-TSS (NM_001165)   | promoter-TSS (NM_001165)  | -279    | NM_001165 | 59344     | Hs.232770 | NM_001165         | HPRD:06231       |
| hESC-Imerge_insp_peak_200 | chr17       | 37023676  | 37024175  | Intergenic                 | tRNA-Cys-TGY tRNA tRNA    | -2187   | NR_073384 | 3927      | Hs.741156 | NM_006148         | HPRD:04229       |
| hESC-Imerge_insp_peak_57  | chr1        | 161438946 | 161439445 | Intergenic                 | CpG                       | -36010  | NM_021642 | 2212      | Hs.352642 | NM_021642         | HPRD:00906       |
| hESC-Imerge_insp_peak_66  | chr1        | 167684512 | 167685011 | Intergenic                 | tRNA-Pro-CYC tRNA tRNA    | -6426   | NM_024569 | 9019      | Hs.493919 | NM_003593         | HPRD:05086       |
| hESC-Imerge_insp_peak_294 | chr6        | 263232849 | 26323348  | Intergenic                 | tRNA-Arg-CGA tRNA tRNA    | -37371  | NM_003543 | 8365      | Hs.591790 | NM_003543         | HPRD:11919       |
| hESC-Imerge_insp_peak_263 | chr4        | 49644675  | 49645174  | Intergenic                 | GAATG SINE Satellite      | 656265  | NM_001286 | 80157     | Hs.479703 | NM_002587         | HPRD:08638       |
| hESC-Imerge_insp_peak_371 | chr6        | 27720954  | 27721453  | Intergenic                 | tRNA-Val-GTY tRNA tRNA    | -8320   | NR_038929 | 100131289 | Hs.200573 | NR_038929         | HPRD:03592       |
| hESC-Imerge_insp_peak_457 | chr9        | 66834149  | 66834648  | Intergenic                 | ALR Alpha Satellite centr | -88569  | NR_121570 | 101928381 | Hs.708686 | NR_121570         | HPRD:03592       |
| hESC-Imerge_insp_peak_399 | chr6        | 28757327  | 28757826  | Intergenic                 | tRNA-Ala-GCA tRNA tRNA    | 73878   | NR_033379 | 401242    | Hs.448285 | NR_033379         | ENSG00000225595  |
| hESC-Imerge_insp_peak_81  | chr1        | 228772645 | 228773144 | Intergenic                 | CpG                       | -7500   | NR_037962 | 58480     | Hs.647774 | NM_021205         | HPRD:06965       |
| hESC-Imerge_insp_peak_309 | chr6        | 26577909  | 26577589  | Intergenic                 | tRNA-Tyr-TAC tRNA tRNA    | -19832  | NM_013375 | 29777     | Hs.254406 | NM_013375         | HPRD:16469       |
| hESC-Imerge_insp_peak_176 | chr16       | 70812733  | 70813232  | intron (NM_018052, intron) | tRNA-Gly-GGY tRNA tRNA    | 22079   | NM_018052 | 55697     | Hs.445061 | NM_018052         | HPRD:07660       |
| hESC-Imerge_insp_peak_462 | chr9        | 137029374 | 137029873 | promoter-TSS (NR_023344)   | promoter-TSS (NR_023344)  | 63      | NR_023344 | 100151684 | Hs.545589 | NR_023344         | ENSG000002021676 |
| hESC-Imerge_insp_peak_273 | chr5        | 140105580 | 140106079 | promoter-TSS (NR_026705)   | promoter-TSS (NR_026705)  | 85      | NR_026705 | 56662     | NR_026705 | ENSG00000202515   | HPRD:07660       |
| hESC-Imerge_insp_peak_27  | chr1        | 147774635 | 147775134 | intron (NR_102404, intron) | tRNA-His-CAY tRNA tRNA    | 31794   | NR_102404 | 100847044 | NR_102404 | NR_102404         | HPRD:049810      |
| hESC-Imerge_insp_peak_63  | chr1        | 161582291 | 161582790 | Intergenic                 | tRNA-Gly-GGA tRNA tRNA    | 6691    | NR_024151 | 3311      | Hs.662180 | NR_024151         | HPRD:07660       |
| hESC-Imerge_insp_peak_145 | chr15       | 26327164  | 26327663  | Intergenic                 | tRNA-Glu-GAG tRNA tRNA    | -33547  | NR_038851 | 503519    | Hs.371380 | NR_038851         | ENSG00000259150  |
| hESC-Imerge_insp_peak_79  | chr1        | 228768167 | 228768666 | Intergenic                 | CpG                       | -11978  | NR_037962 | 58480     | Hs.647774 | NM_021205         | HPRD:06965       |
| hESC-Imerge_insp_peak_208 | chr17       | 73031015  | 73031514  | intron (NR_110835, intron) | tRNA-Arg-CGG tRNA tRNA    | 2602    | NR_110835 | 23510     | Hs.514468 | NM_015353         | HPRD:17176       |
| hESC-Imerge_insp_peak_397 | chr6        | 28715311  | 28715810  | Intergenic                 | tRNA-Lys-AAA tRNA tRNA    | 115894  | NR_033379 | 401242    | Hs.448285 | NR_033379         | ENSG00000225595  |
| hESC-Imerge_insp_peak_344 | chr6        | 27447252  | 27447751  | Intergenic                 | tRNA-Asp-GAY tRNA tRNA    | -6604   | NM_007149 | 7738      | Hs.158174 | NM_007149         | HPRD:03785       |
| hESC-Imerge_insp_peak_158 | chr16       | 3200464   | 3200963   | Intergenic                 | tRNA-Arg-CGG tRNA tRNA    | 15579   | NM_011344 | 7760      | Hs.115284 | NM_004226         | HPRD:12224       |
| hESC-Imerge_insp_peak_334 | chr6        | 27205105  | 27205604  | Intergenic                 | tRNA-Ile-ATT tRNA tRNA    | -10148  | NM_005865 | 10279     | Hs.274407 | NM_005865         | HPRD:06205       |
| hESC-Imerge_insp_peak_44  | chr1        | 161391672 | 161392171 | Intergenic                 | tRNA-Glu-GAA tRNA tRNA    | -54248  | NM_001013 | 257177    | Hs.534593 | NM_001013625      | HPRD:13257       |
| hESC-Imerge_insp_peak_411 | chr6        | 28911181  | 28911680  | promoter-TSS (NR_103538)   | promoter-TSS (NR_103538)  | -131    | NR_103538 | 729583    | Hs.453549 | NR_103538         | HPRD:17695       |
| hESC-Imerge_insp_peak_375 | chr6        | 27870463  | 27870962  | Intergenic                 | tRNA-Gly-GGY tRNA tRNA    | 9462    | NM_033057 | 81697     | Hs.307111 | NM_033057         | HPRD:17695       |
| hESC-Imerge_insp_peak_336 | chr6        | 27258200  | 27258699  | Intergenic                 | tRNA-Val-GGT tRNA tRNA    | 21562   | NM_033482 | 94026     | Hs.729955 | NM_033482         | ENSG00000158553  |
| hESC-Imerge_insp_peak_221 | chr19       | 48426788  | 48427287  | promoter-TSS (NR_024227)   | promoter-TSS (NR_024227)  | 1       | NR_024229 | 100170216 | Hs.723094 | NR_024229         | HPRD:17817       |
| hESC-Imerge_insp_peak_458 | chr9        | 112467763 | 112468262 | intron (NM_001037293, int) | MIR SINE SINE             | 64944   | NM_001037 | 114299    | Hs.591908 | NR_024229         | HPRD:17817       |
| hESC-Imerge_insp_peak_167 | chr16       | 3239436   | 3239935   | Intergenic                 | tRNA-Pro-CYC tRNA tRNA    | -14562  | NM_012360 | 4992      | Hs.664502 | NM_012360         | HPRD:09125       |
| hESC-Imerge_insp_peak_354 | chr6        | 27543651  | 27544150  | Intergenic                 | tRNA-Lys-AAG tRNA tRNA    | -103003 | NM_007149 | 7738      | Hs.158174 | NM_007149         | HPRD:03785       |
| hESC-Imerge_insp_peak_139 | chr14       | 58706384  | 58706883  | Intergenic                 | tRNA-Lys-AAG tRNA tRNA    | -4890   | NM_002788 | 5684      | Hs.558799 | NM_002788         | HPRD:01463       |
| hESC-Imerge_insp_peak_445 | chr7        | 149388060 | 149388559 | Intergenic                 | tRNA-Cys-TGY tRNA tRNA    | -23793  | NM_025334 | 84626     | Hs.299560 | NM_025334         | HPRD:11167       |
| hESC-Imerge_insp_peak_359 | chr6        | 27573211  | 27573710  | Intergenic                 | tRNA-Leu-TGT tRNA tRNA    | -88354  | NR_038293 | 100507173 | Hs.635987 | NR_038292         | HPRD:17728       |
| hESC-Imerge_insp_peak_94  | chr11       | 59317875  | 59318374  | Intergenic                 | tRNA-Val-GAT tRNA tRNA    | 35738   | NM_001004 | 390199    | Hs.553757 | NM_001004711      | HPRD:17728       |
| hESC-Imerge_insp_peak_257 | chr3        | 190142282 | 190142781 | Intergenic                 | AluSx1 SINE Alu           | 25134   | NM_007316 | 131920    | Hs.335321 | NM_007316         | HPRD:15621       |
| hESC-Imerge_insp_peak_69  | chr1        | 228745789 | 228746288 | Intergenic                 | CpG                       | -34356  | NR_037962 | 58480     | Hs.647774 | NM_021205         | HPRD:06965       |
| hESC-Imerge_insp_peak_423 | chr7        | 23948     | 24447     | Intergenic                 | L1MD3 LINE L1             | -125521 | NR_108065 | 100507642 | Hs.557780 | NR_108064         | HPRD:06965       |
| hESC-Imerge_insp_peak_134 | chr14       | 23398722  | 23399221  | promoter-TSS (NM_001282)   | promoter-TSS (NM_001282)  | 153     | NR_110002 | 101926933 | Hs.727231 | NR_110002         | ENSG00000257285  |
| hESC-Imerge_insp_peak_21  | chr1        | 145978810 | 145979309 | intron (NR_104217, intron) | tRNA-Asn-AAC tRNA tRNA    | -33582  | NR_111936 | 100034745 | Hs.696575 | NR_111936         | ENSG00000215860  |
| hESC-Imerge_insp_peak_209 | chr17       | 80452365  | 80452864  | Intergenic                 | tRNA-Met tRNA tRNA        | -24980  | NM_049514 | 3607      | Hs.591140 | NM_003577         | HPRD:00982       |
| hESC-Imerge_insp_peak_407 | chr6        | 28832336  | 28831735  | promoter-TSS (NR_033379)   | promoter-TSS (NR_033379)  | -31     | NR_033379 | 401242    | Hs.448285 | NR_033379         | ENSG00000225595  |
| hESC-Imerge_insp_peak_301 | chr6        | 26538102  | 26538601  | promoter-TSS (NM_006353)   | promoter-TSS (NM_006353)  | -231    | NM_006353 | 10473     | Hs.236774 | NM_006353         | HPRD:03592       |
| hESC-Imerge_insp_peak_59  | chr1        | 161493409 | 161493908 | promoter-TSS (NM_002155)   | promoter-TSS (NM_002155)  | -378    | NM_002155 | 3310      | Hs.654614 | NM_002155         | HPRD:00775       |
| hESC-Imerge_insp_peak_426 | chr7        | 73157170  | 73157669  | Intergenic                 | Intergenic                | -4222   | NM_001301 | 83451     | Hs.647045 | NM_148912         | HPRD:15658       |
| hESC-Imerge_insp_peak_254 | chr3        | 131947732 | 131948231 | Intergenic                 | tRNA-Cys-TGY tRNA tRNA    | -88230  | NM_010199 | 55        | Hs.433060 | NM_010199         | HPRD:01378       |
| hESC-Imerge_insp_peak_87  | chr10       | 5895409   | 5895908   | Intergenic                 | Intergenic                | -35877  | NM_001258 | 84893     | Hs.498543 | NM_032807         | HPRD:06243       |
| hESC-Imerge_insp_peak_339 | chr6        | 27265566  | 27266065  | Intergenic                 | tRNA-Ser-AGY tRNA tRNA    | 14196   | NM_033482 | 94026     | Hs.729955 | NM_033482         | ENSG00000158553  |
| hESC-Imerge_insp_peak_220 | chr19       | 48423324  | 48423823  | Intergenic                 | L1MC4 LINE L1             | 1887    | NR_004435 | 100126798 | Hs.579631 | NR_004435         | HPRD:06243       |
| hESC-Imerge_insp_peak_92  | chr11       | 5246623   | 5246762   | TTS (NM_000518)            | TTS (NM_000518)           | 1789    | NM_000518 | 3043      | Hs.523443 | NR_000518         | HPRD:00786       |
| hESC-Imerge_insp_peak_196 | chr17       | 19411284  | 19411783  | Intergenic                 | tRNA-Trp-TGG tRNA tRNA    | -25634  | NM_018242 | 55244     | Hs.232054 | NM_018242         | HPRD:07703       |
| hESC-Imerge_insp_peak_10  | chr1        | 17215987  | 17216486  | Intergenic                 | tRNA-Asn-AAC tRNA tRNA    | -30720  | NR_037446 | 100500876 | NR_037446 | miRBase:MI0016076 | HPRD:07703       |
| hESC-Imerge_insp_peak_205 | chr17       | 66015792  | 66016291  | Intergenic                 | tRNA-Arg-AGG tRNA tRNA    | -15807  | NM_002266 | 3838      | Hs.594238 | NM_002266         | HPRD:02818       |
| hESC-Imerge_insp_peak_382 | chr6        | 28564911  | 28565410  | Intergenic                 | tRNA-Ser-AGY tRNA tRNA    | -10048  | NM_025923 | 114821    | Hs.176980 | NM_025923         | HPRD:11720       |
| hESC-Imerge_insp_peak_341 | chr6        | 27300545  | 27301044  | Intergenic                 | tRNA-Met tRNA tRNA        | 8254    | NR_045612 | 387316    | Hs.326753 | NM_032030         | HPRD:11720       |
| hESC-Imerge_insp_peak_390 | chr6        | 28663480  | 28663979  | Intergenic                 | tRNA-Ala-GCY tRNA tRNA    | -108617 | NM_025923 | 114821    | Hs.176980 | NM_025923         | HPRD:11720       |
| hESC-Imerge_insp_peak_144 | chr14       | 105948161 | 105948660 | Intergenic                 | Intergenic                | 4827    | NR_073085 | 1397      | Hs.534309 | NM_001312         | HPRD:03113       |
| hESC-Imerge_insp_peak_172 | chr16       | 22308264  | 22308763  | promoter-TSS (NM_001258)   | promoter-TSS (NM_001258)  | -183    | NM_018119 | 55718     | Hs.462098 | NM_018119         | HPRD:15155       |
| hESC-Imerge_insp_peak_239 | chr19_g1000 | 91081     | 91580     | NA                         | ALR Alpha Satellite centr | NA      | NA        | NA        | NA        | NA                | HPRD:17489       |
| hESC-Imerge_insp_peak_453 | chr8        | 124169253 | 124169752 | Intergenic                 | tRNA-Met tRNA tRNA        | -21785  | NM_007006 | 84985     | Hs.379821 | NM_032899         | HPRD:17489       |
| hESC-Imerge_insp_peak_439 | chr7        | 149095161 | 149095660 | Intergenic                 | tRNA-Cys-TGY tRNA tRNA    | 62643   | NM_015694 | 27153     | Hs.38512  | NM_015694         | HPRD:13849       |
| hESC-Imerge_insp_peak_99  | chr11       | 59333628  | 59334127  | Intergenic                 | tRNA-Phe-TTY tRNA tRNA    | 28754   | NR_036120 | 1004      |           |                   |                  |

|                          |       |           |           |                           |                                |         |           |           |           |              |                   |
|--------------------------|-------|-----------|-----------|---------------------------|--------------------------------|---------|-----------|-----------|-----------|--------------|-------------------|
| hESC-Imerge_inp_peak_304 | chr6  | 2655278   | 2655577   | Intergenic                | tRNA-Pro-CYC [tRNA] tRNA       | 16955   | NM_006353 | 10473     | Hs.236774 | NM_006353    |                   |
| hESC-Imerge_inp_peak_260 | chr4  | 7325522   | 7326021   | intron (NM_020777, intron | MIRB [SINE] [MIR               | 13594   | NR_039961 | 100616471 |           | NR_039961    |                   |
| hESC-Imerge_inp_peak_83  | chr1  | 22877113  | 22877612  | Intergenic                | CpG                            | -3032   | NR_037962 | 58480     | Hs.647774 | NM_021205    | HPRD:06965        |
| hESC-Imerge_inp_peak_401 | chr6  | 28763513  | 28764012  | Intergenic                | tRNA-Ala-GCY [tRNA] tRNA       | 67692   | NR_033379 | 401242    | Hs.448285 | NR_033379    | ENSG00000225595   |
| hESC-Imerge_inp_peak_90  | chr10 | 30145911  | 30146410  | Intergenic                | AluX4 [SINE] [Alu              | -121430 | NM_003174 | 6840      | Hs.499209 | NM_003174    | HPRD:04992        |
| hESC-Imerge_inp_peak_39  | chr1  | 149683897 | 149684396 | Intergenic                | tRNA-Val-GGT [tRNA] tRNA       | -70104  | NM_000566 | 2209      | Hs.77424  | NM_000566    | HPRD:00904        |
| hESC-Imerge_inp_peak_353 | chr6  | 27529783  | 27530282  | Intergenic                | tRNA-Arg-AGA [tRNA] tRNA       | -89135  | NM_007149 | 7738      | Hs.158174 | NM_007149    | HPRD:03785        |
| hESC-Imerge_inp_peak_330 | chr6  | 27181389  | 27181888  | Intergenic                | tRNA-Arg-CGY [tRNA] tRNA       | -33864  | NM_005865 | 10279     | Hs.274407 | NM_005865    | HPRD:06205        |
| hESC-Imerge_inp_peak_314 | chr6  | 26705386  | 26705885  | Intergenic                | tRNA-Ala-GCY [tRNA] tRNA       | -45655  | NM_001242 | 79692     | Hs.126280 | NM_001242    | HPRD:02639        |
| hESC-Imerge_inp_peak_333 | chr6  | 27203076  | 27203575  | Intergenic                | tRNA-Val-GTY [tRNA] tRNA       | -12177  | NM_005865 | 10279     | Hs.274407 | NM_005865    | HPRD:06205        |
| hESC-Imerge_inp_peak_122 | chr14 | 21081334  | 21081833  | Intergenic                | tRNA-Pro-CYC [tRNA] tRNA       | -22601  | NM_001024 | 493901    | Hs.729466 | NM_001024822 | HPRD:18667        |
| hESC-Imerge_inp_peak_31  | chr1  | 148000609 | 148001108 | intron (NR_102404, intron | tRNA-Asn-AAC [tRNA] tRNA       | 6712    | NR_104086 | 101954277 |           | NR_104086    |                   |
| hESC-Imerge_inp_peak_298 | chr6  | 26521227  | 26521726  | promoter-TSS (NR_026790)  | promoter-TSS (NR_026790)       | -458    | NR_026790 | 493812    | Hs.272939 | NR_026790    | ENSG00000228223   |
| hESC-Imerge_inp_peak_345 | chr6  | 27463385  | 27463884  | Intergenic                | tRNA-Ser-TCT [tRNA] tRNA       | -22737  | NM_007149 | 7738      | Hs.158174 | NM_007149    | HPRD:03785        |
| hESC-Imerge_inp_peak_422 | chr6  | 144537493 | 144537992 | Intergenic                | tRNA-Leu-TTA [tRNA] tRNA       | 60888   | NM_003764 | 8676      | Hs.118958 | NM_003764    |                   |
| hESC-Imerge_inp_peak_237 | chr19 | 57149262  | 57149761  | Intergenic                | CpG                            | -5016   | NM_001193 | 147670    | Hs.336588 | NM_001193628 |                   |
| hESC-Imerge_inp_peak_443 | chr7  | 149343857 | 149344356 | Intergenic                | tRNA-Cys-TGY [tRNA] tRNA       | -22225  | NR_027789 | 79370     | Hs.520785 | NM_027789    | HPRD:07791        |
| hESC-Imerge_inp_peak_251 | chr3  | 42108039  | 42108538  | Intergenic                | Intergenic                     | -24458  | NM_001042 | 22906     | Hs.535711 | NM_001042    | HPRD:08732        |
| hESC-Imerge_inp_peak_393 | chr6  | 28693609  | 28694108  | Intergenic                | tRNA-Thr-ACG [tRNA] tRNA       | 137596  | NR_033379 | 401242    | Hs.448285 | NR_033379    | ENSG00000225595   |
| hESC-Imerge_inp_peak_41  | chr1  | 153643520 | 153644019 | promoter-TSS (NM_004515)  | promoter-TSS (NM_004515)       | -265    | NM_004515 | 3608      | Hs.75117  | NM_004515    | HPRD:04419        |
| hESC-Imerge_inp_peak_199 | chr17 | 37017696  | 37018195  | Intergenic                | tRNA-Cys-TGY [tRNA] tRNA       | -7892   | NM_000978 | 9349      | Hs.406300 | NM_000978    |                   |
| hESC-Imerge_inp_peak_374 | chr6  | 27763421  | 27763920  | Intergenic                | tRNA-Gln-CAA [tRNA] tRNA       | 12039   | NM_003519 | 8340      | Hs.137594 | NM_003519    | HPRD:11898        |
| hESC-Imerge_inp_peak_319 | chr6  | 26745029  | 26745528  | Intergenic                | tRNA-Ile-ATT [tRNA] tRNA       | -85298  | NM_001242 | 79692     | Hs.126280 | NM_001242    | HPRD:02639        |
| hESC-Imerge_inp_peak_215 | chr19 | 6065691   | 6067090   | intron (NM_000635, intron | intron (NM_000635, intron      | 43824   | NM_000635 | 5990      | Hs.465709 | NM_000635    | HPRD:00824        |
| hESC-Imerge_inp_peak_65  | chr1  | 167683742 | 167684241 | Intergenic                | tRNA-Pro-CGC [tRNA] tRNA       | -7196   | NM_024569 | 9019      | Hs.493919 | NM_024569    | HPRD:05086        |
| hESC-Imerge_inp_peak_469 | chrX  | 18692793  | 18693292  | Intergenic                | tRNA-Val-GTA [tRNA] tRNA       | -2819   | NM_000330 | 6247      | Hs.715725 | NM_000330    | HPRD:02426        |
| hESC-Imerge_inp_peak_321 | chr6  | 26766179  | 26766678  | Intergenic                | Intergenic                     | -106448 | NM_001242 | 79692     | Hs.126280 | NM_001242    | HPRD:02639        |
| hESC-Imerge_inp_peak_168 | chr16 | 3241769   | 3242268   | Intergenic                | tRNA-Pro-CYC [tRNA] tRNA       | -12229  | NM_012360 | 4992      | Hs.664502 | NM_012360    | HPRD:09125        |
| hESC-Imerge_inp_peak_408 | chr6  | 28848959  | 28849458  | Intergenic                | tRNA-Arg-CGY [tRNA] tRNA       | -15099  | NR_104117 | 414760    | Hs.211005 | NR_104117    |                   |
| hESC-Imerge_inp_peak_35  | chr1  | 149294420 | 149294919 | Intergenic                | tRNA-Gly-GGG [tRNA] tRNA       | 7218    | NR_119394 | 644634    | Hs.723057 | NR_119394    |                   |
| hESC-Imerge_inp_peak_378 | chr6  | 28456552  | 28457051  | Intergenic                | tRNA-Thr-ACG [tRNA] tRNA       | 26769   | NM_182701 | 257202    | Hs.448570 | NM_182701    | HPRD:12132        |
| hESC-Imerge_inp_peak_211 | chr19 | 893303    | 893802    | promoter-TSS (NM_005481)  | promoter-TSS (NM_005481)       | 68      | NR_125730 | 103625684 |           | NR_125730    |                   |
| hESC-Imerge_inp_peak_45  | chr1  | 161397653 | 161398152 | Intergenic                | tRNA-Asn-AAC [tRNA] tRNA       | -60229  | NM_001013 | 257177    | Hs.534593 | NM_001013625 | HPRD:13257        |
| hESC-Imerge_inp_peak_227 | chr19 | 50605097  | 50605596  | Intergenic                | AluY5 [SINE] [Alu              | -1018   | NR_024422 | 100191063 | Hs.723094 | NR_024422    |                   |
| hESC-Imerge_inp_peak_259 | chr4  | 1421833   | 1422332   | Intergenic                | Intergenic                     | -21852  | NM_001290 | 54729     | Hs.526396 | NM_001290979 |                   |
| hESC-Imerge_inp_peak_470 | chrX  | 47661858  | 47662357  | Intergenic                | MER8B-Int [LTR] ERV1           | -34194  | NM_007137 | 347344    | Hs.114246 | NM_007137    |                   |
| hESC-Imerge_inp_peak_112 | chr12 | 125406082 | 125406581 | Intergenic                | tRNA-Ala-GCG [tRNA] tRNA       | 6238    | NR_049820 | 100847004 |           | NR_049820    | miRBase:MI0018167 |
| hESC-Imerge_inp_peak_222 | chr19 | 48437225  | 48437724  | promoter-TSS (NR_004435)  | promoter-TSS (NR_004435)       | 36      | NR_004435 | 100126798 | Hs.579631 | NR_004435    |                   |
| hESC-Imerge_inp_peak_267 | chr4  | 191043641 | 191044140 | Intergenic                | (TTAGGG) [Simple_repeat]       | 58233   | NR_121644 | 100419743 |           | NR_121644    |                   |
| hESC-Imerge_inp_peak_340 | chr6  | 27271346  | 27271845  | Intergenic                | tRNA-Met-i [tRNA] tRNA         | 8416    | NM_033482 | 94026     | Hs.729955 | NM_033482    | ENSG00000158553   |
| hESC-Imerge_inp_peak_135 | chr14 | 32671250  | 32672649  | promoter-TSS (NR_125730)  | promoter-TSS (NR_125730)       | 76      | NR_125730 | 103625684 |           | NR_125730    |                   |
| hESC-Imerge_inp_peak_195 | chr17 | 17863379  | 17863878  | intron (NM_001033551, int | MIRB [SINE] [MIR               | 12156   | NM_001082 | 146691    | Hs.462379 | NM_001082    | HPRD:18213        |
| hESC-Imerge_inp_peak_324 | chr6  | 26987947  | 26988446  | promoter-TSS (NR_026776)  | promoter-TSS (NR_026776)       | -111    | NR_026776 | 100270746 | Hs.590428 | NR_026776    |                   |
| hESC-Imerge_inp_peak_88  | chr10 | 22518221  | 22518720  | Intergenic                | tRNA-Asn-AAC [tRNA] tRNA       | -19558  | NM_001199 | 340900    | Hs.450519 | NM_001199938 | ENSG00000223601   |
| hESC-Imerge_inp_peak_300 | chr6  | 26537533  | 26538032  | promoter-TSS (NM_006353)  | promoter-TSS (NM_006353)       | -790    | NM_006353 | 10473     | Hs.236774 | NM_006353    |                   |
| hESC-Imerge_inp_peak_262 | chr4  | 49637821  | 49637870  | Intergenic                | (GAATG) [Satellite] [Satellite | 648871  | NM_001286 | 80157     | Hs.479703 | NM_001286    | HPRD:08638        |
| hESC-Imerge_inp_peak_126 | chr14 | 21100961  | 21101460  | Intergenic                | tRNA-Pro-CCA [tRNA] tRNA       | 8640    | NM_001001 | 341799    | Hs.513132 | NM_001001968 | HPRD:17779        |
| hESC-Imerge_inp_peak_202 | chr17 | 37309767  | 37310266  | Intergenic                | tRNA-Cys-TGY [tRNA] tRNA       | -2114   | NM_024005 | 57125     | Hs.125036 | NM_024005    | HPRD:08439        |
| hESC-Imerge_inp_peak_386 | chr6  | 28615751  | 28616250  | Intergenic                | tRNA-Thr-ACG [tRNA] tRNA       | -60888  | NM_052923 | 114821    | Hs.176980 | NM_052923    | HPRD:11720        |
| hESC-Imerge_inp_peak_60  | chr1  | 161499922 | 161500421 | Intergenic                | tRNA-Leu-CTG [tRNA] tRNA       | 6135    | NM_021155 | 3310      | Hs.654614 | NM_021155    | HPRD:00775        |
| hESC-Imerge_inp_peak_53  | chr1  | 161427710 | 161428209 | Intergenic                | CpG                            | -47246  | NM_021642 | 2212      | Hs.352642 | NM_021642    | HPRD:00906        |
| hESC-Imerge_inp_peak_234 | chr19 | 50638616  | 50639115  | promoter-TSS (NR_024230)  | promoter-TSS (NR_024230)       | 66      | NR_024230 | 100170217 | Hs.723095 | NR_024230    |                   |
| hESC-Imerge_inp_peak_454 | chr9  | 14433720  | 14434219  | Intergenic                | tRNA-His-CAY [tRNA] tRNA       | -34987  | NM_001190 | 4781      | Hs.644095 | NM_001190    | HPRD:09008        |
| hESC-Imerge_inp_peak_73  | chr1  | 228754765 | 228755264 | Intergenic                | CpG                            | -25380  | NR_037962 | 58480     | Hs.647774 | NM_021205    | HPRD:06965        |
| hESC-Imerge_inp_peak_420 | chr6  | 58149042  | 58149541  | Intergenic                | tRNA-Ile-ATT [tRNA] tRNA       | 138433  | NR_125730 | 375513    | Hs.561530 | NM_125730    |                   |
| hESC-Imerge_inp_peak_61  | chr1  | 161506961 | 16150190  | Intergenic                | tRNA-Gly-GGA [tRNA] tRNA       | 6904    | NM_021155 | 3310      | Hs.654614 | NM_021155    | HPRD:00775        |
| hESC-Imerge_inp_peak_436 | chr7  | 149007076 | 149007575 | Intergenic                | tRNA-Cys-TGY [tRNA] tRNA       | 24953   | NR_036573 | 155060    | Hs.490512 | NR_036573    | HPRD:17309        |
| hESC-Imerge_inp_peak_49  | chr1  | 161417805 | 161418304 | Intergenic                | CpG                            | -57151  | NM_021642 | 2212      | Hs.352642 | NM_021642    | HPRD:00906        |
| hESC-Imerge_inp_peak_214 | chr19 | 4723876   | 4724375   | promoter-TSS (NM_139159)  | promoter-TSS (NM_139159)       | -270    | NM_139159 | 91039     | Hs.515081 | NM_139159    | HPRD:07001        |
| hESC-Imerge_inp_peak_363 | chr6  | 27636174  | 27636673  | Intergenic                | tRNA-Ile-ATT [tRNA] tRNA       | -25391  | NR_038293 | 100507173 | Hs.635987 | NR_038293    |                   |
| hESC-Imerge_inp_peak_22  | chr1  | 146544575 | 146545074 | Intergenic                | tRNA-His-CAY [tRNA] tRNA       | 11479   | NR_121645 | 101447996 |           | NR_121645    | HPRD:08494        |
| hESC-Imerge_inp_peak_138 | chr14 | 50329207  | 50329706  | Intergenic                | 7SLRNA [srpRNA] [srpRNA        | -9917   | NM_004713 | 9147      | Hs.655964 | NM_004713    | HPRD:08494        |
| hESC-Imerge_inp_peak_279 | chr5  | 180614508 | 180615007 | Intergenic                | tRNA-Leu-CYT [tRNA] tRNA       | 4151    | NR_108031 | 102577426 | Hs.277359 | NR_108031    |                   |
| hESC-Imerge_inp_peak_431 | chr7  | 148199098 | 148199597 | Intergenic                | AluSc8 [SINE] [Alu             | -88310  | NM_145304 | 202865    | Hs.352212 | NM_145304    | HPRD:12921        |
| hESC-Imerge_inp_peak_337 | chr6  | 27261464  | 27261963  | Intergenic                | tRNA-Ile-ATT [tRNA] tRNA       | 18298   | NM_033482 | 94026     | Hs.729955 | NM_033482    | ENSG00000158553   |
| hESC-Imerge_inp_peak_231 | chr19 | 50620782  | 50621281  | promoter-TSS (NR_024228)  | promoter-TSS (NR_024228)       | 66      | NR_024223 | 100169952 | Hs.723094 | NR_024223    |                   |
| hESC-Imerge_inp_peak_299 | chr6  | 26532902  | 26533401  | Intergenic                | tRNA-Thr-ACY [tRNA] tRNA       | -5421   | NM_006353 | 10473     | Hs.236774 | NM_006353    |                   |
| hESC-Imerge_inp_peak_184 | chr17 | 8028852   | 8029351   | Intergenic                | tRNA-Gly-GGG [tRNA] tRNA       | -1691   | NM_011655 | 84667     | Hs.434828 | NM_032580    | HPRD:09729        |
| hESC-Imerge_inp_peak_446 | chr7  | 149404541 | 149405040 | Intergenic                | tRNA-Cys-TGY [tRNA] tRNA       | -7312   | NM_032534 | 84626     | Hs.299560 | NM_032534    | HPRD:11167        |
| hESC-Imerge_inp_peak_287 | chr6  | 26286539  | 26287038  | Intergenic                | tRNA-Met-i [tRNA] tRNA         | -1061   | NM_003543 | 8365      | Hs.591790 | NM_003543    | HPRD:11919        |
| hESC-Imerge_inp_peak_180 | chr16 | 87417406  | 87417905  | promoter-TSS (NM_024735)  | promoter-TSS (NM_024735)       | -256    | NM_024735 | 79791     | Hs.567582 | NM_024735    |                   |
| hESC-Imerge_inp_peak_86  | chr1  | 249167589 | 249168358 | Intergenic                | tRNA-Leu-TTG [tRNA] tRNA       | -14793  | NM_001193 | 55657     | Hs.377705 | NM_001193    | HPRD:07922        |
| hESC-Imerge_inp_peak_460 | chr9  | 126655294 | 126655793 | intron (NM_020946, intron | MIR [SINE] [MIR                | 36874   | NM_020946 | 57706     | Hs.744995 | NM_020946    | HPRD:17221        |
| hESC-Imerge_inp_peak_11  | chr1  | 24515143  | 24515642  | Intergenic                | AluX1 [SINE] [Alu              | -1627   | NM_173064 | 163702    | Hs.213713 | NM_173064    | HPRD:09589        |
| hESC-Imerge_inp_peak_123 | chr14 | 21093358  | 21093857  | Intergenic                | tRNA-Leu-CTA [tRNA] tRNA       | 16243   | NM_001001 | 341799    | Hs.513132 | NM_001001968 | HPRD:17779        |
| hESC-Imerge_inp_peak_82  | chr1  | 228774871 | 228775370 | Intergenic                | CpG                            | -5274   | NR_037962 | 58480     | Hs.6      |              |                   |

**Supplementary Table 7**

| PeakID (cmd=annotatPeaks.pl hESC-3merge_in | Chr    | Start     | End       | Annotation                        | Detailed Annotation                   | Distance to TSS | Nearest Promoter | Entrez ID | Nearest Unigene | Nearest Refseq    | Nearest Ensembl   |
|--------------------------------------------|--------|-----------|-----------|-----------------------------------|---------------------------------------|-----------------|------------------|-----------|-----------------|-------------------|-------------------|
| hESC-3merge_in_peak_302                    | chr6   | 28715308  | 28715807  | Intergenic                        | IRNA-Lys-AAA [RNA] [RNA]              | -115897         | NR_033379        | 401242    | Hs.448285       | NR_033379         | ENSG0000022595    |
| hESC-3merge_in_peak_144                    | chr17  | 8023422   | 8023921   | TTS (NM_032580)                   | TTS (NM_032580)                       | -1437           | NR_001165        | 59344     | Hs.232770       | NR_001165         | HPRD:06231        |
| hESC-3merge_in_peak_342                    | chr8   | 124169257 | 124169756 | Intergenic                        | IRNA-Met [RNA] [RNA]                  | -21791          | NM_027006        | 84985     | Hs.379821       | NM_027006         | HPRD:17489        |
| hESC-3merge_in_peak_128                    | chr6   | 2747620   | 27477175  | Intergenic                        | IRNA-TTG [RNA] [RNA]                  | -30038          | NR_033379        | 401242    | Hs.448285       | NR_033379         | HPRD:03785        |
| hESC-3merge_in_peak_269                    | chr6   | 27573202  | 27573701  | Intergenic                        | IRNA-Leu-TG [RNA] [RNA]               | -88363          | NR_033923        | 100507173 | Hs.635987       | NR_033923         | HPRD:03785        |
| hESC-3merge_in_peak_345                    | chr9   | 124082427 | 124082746 | intron (NM_001127662, intron 5)   | intron (NM_001127662, intron 5)       | 20417           | NM_001177        | 2934      | Hs.523273       | NM_001177         | HPRD:00674        |
| hESC-3merge_in_peak_27                     | chr1   | 153643505 | 153644004 | promoter-TSS (NM_004515)          | promoter-TSS (NM_004515)              | -250            | NM_004515        | 3608      | Hs.75117        | NM_004515         | HPRD:04419        |
| hESC-3merge_in_peak_257                    | chr6   | 27463451  | 27463950  | Intergenic                        | Intergenic                            | -22803          | NM_007149        | 7738      | Hs.158174       | NM_007149         | HPRD:03785        |
| hESC-3merge_in_peak_31                     | chr1   | 161412883 | 161413382 | Intergenic                        | CpG                                   | -62073          | NM_021642        | 2212      | Hs.352642       | NM_021642         | HPRD:09006        |
| hESC-3merge_in_peak_108                    | chr14  | 23398702  | 23399201  | promoter-TSS (NM_001282953)       | promoter-TSS (NM_001282953)           | 133             | NR_110002        | 101926933 | Hs.727321       | NR_110002         | ENSG00000257285   |
| hESC-3merge_in_peak_189                    | chr3   | 131947220 | 131948219 | Intergenic                        | IRNA-Cys-TG [RNA] [RNA]               | -48242          | NM_001099        | 55        | Hs.433060       | NM_001099         | HPRD:01378        |
| hESC-3merge_in_peak_7                      | chr1   | 17198800  | 17199399  | Intergenic                        | CpG                                   | -13593          | NR_037446        | 100500876 | Hs.492203       | NR_037446         | miRBase:MI0016076 |
| hESC-3merge_in_peak_199                    | chr5   | 1293699   | 1294198   | exon (NM_001193376, exon 2)       | exon (NM_001193376, exon 2)           | 1214            | NM_198253        | 7015      | Hs.492203       | NM_198253         | HPRD:01754        |
| hESC-3merge_in_peak_119                    | chr15  | 45492385  | 45492884  | intron (NM_138356, intron 1)      | IRNA-His-CAY [RNA] [RNA]              | 739             | NM_138356        | 9025      | Hs.130399       | NM_138356         | HPRD:14274        |
| hESC-3merge_in_peak_96                     | chr14  | 21078111  | 210781610 | Intergenic                        | IRNA-Leu-CY [RNA] [RNA]               | -19378          | NM_010244        | 493901    | Hs.729466       | NM_010244         | HPRD:18667        |
| hESC-3merge_in_peak_129                    | chr16  | 3239423   | 3239922   | Intergenic                        | IRNA-Pro-CYC [RNA] [RNA]              | -14575          | NM_012360        | 4992      | Hs.664502       | NM_012360         | HPRD:09125        |
| hESC-3merge_in_peak_322                    | chr7   | 23950     | 24449     | Intergenic                        | L1MD3 [LINE] [L1]                     | -125519         | NR_108065        | 100507642 | Hs.557780       | NR_108064         |                   |
| hESC-3merge_in_peak_276                    | chr6   | 27652322  | 276527321 | Intergenic                        | IRNA-Thr-ACY [RNA] [RNA]              | -9332           | NR_038293        | 100507173 | Hs.635987       | NR_038292         |                   |
| hESC-3merge_in_peak_189                    | chr15  | 26327142  | 26327641  | Intergenic                        | IRNA-Glu-GAG [RNA] [RNA]              | -33569          | NR_038551        | 503519    | Hs.371380       | NR_038551         | ENSG000002259150  |
| hESC-3merge_in_peak_115                    | chr15  | 45493136  | 45493635  | promoter-TSS (NM_138356)          | promoter-TSS (NM_138356)              | 12              | NM_138356        | 9025      | Hs.130399       | NM_138356         | HPRD:14272        |
| hESC-3merge_in_peak_316                    | chr6   | 28918596  | 28919095  | Intergenic                        | IRNA-Lys-AAA [RNA] [RNA]              | 7284            | NR_103538        | 729583    | Hs.453549       | NR_103538         |                   |
| hESC-3merge_in_peak_175                    | chr19  | 1893245   | 1893244   | promoter-TSS (NR_036155)          | promoter-TSS (NR_036155)              | -128            | NM_001286        | 3727      | Hs.2780         | NM_001286         | HPRD:01304        |
| hESC-3merge_in_peak_58                     | chr1   | 228770406 | 228770905 | Intergenic                        | CpG                                   | -9739           | NR_037962        | 58480     | Hs.647774       | NM_021205         | HPRD:06965        |
| hESC-3merge_in_peak_314                    | chr6   | 28912124  | 28912623  | TTS (NR_103538)_5                 | TTS (NR_103538)_5                     | 812             | NR_103538        | 729583    | Hs.453549       | NR_103538         |                   |
| hESC-3merge_in_peak_299                    | chr6   | 28696877  | 28697376  | Intergenic                        | IRNA-Ala-GCY [RNA] [RNA]              | 134238          | NR_033379        | 401242    | Hs.448285       | NR_033379         | ENSG00000225595   |
| hESC-3merge_in_peak_248                    | chr6   | 27247837  | 27248336  | Intergenic                        | IRNA-Val-GTG [RNA] [RNA]              | 31925           | NM_033482        | 94026     | Hs.729955       | NM_033482         | ENSG00000158553   |
| hESC-3merge_in_peak_306                    | chr1   | 933327    | 933376    | intron (NM_001282587, intron 1)   | IRNA-Ala-GCY [RNA] [RNA]              | 20663           | NR_033379        | 401242    | Hs.448285       | NR_033379         | HPRD:00681        |
| hESC-3merge_in_peak_170                    | chr19  | 1383860   | 1383859   | promoter-TSS (NM_024407)          | promoter-TSS (NM_024407)              | -274            | NM_024407        | 374293    | Hs.211914       | NM_024407         |                   |
| hESC-3merge_in_peak_83                     | chr12  | 6041368   | 6041867   | intron (NM_001278597, G-rich)     | IRNA-GA-rich [Low complexity] [Low c. | 12808           | NM_001278        | 57101     | Hs.148970       | NM_001278         | HPRD:11634        |
| hESC-3merge_in_peak_181                    | chr2   | 27273454  | 27273953  | promoter-TSS (NM_021831)          | promoter-TSS (NM_021831)              | -572            | NR_046730        | 100874031 | Hs.132725       | NR_046730         |                   |
| hESC-3merge_in_peak_133                    | chr16  | 22308267  | 22308766  | promoter-TSS (NM_001258034)       | promoter-TSS (NM_001258034)           | -180            | NM_018119        | 55718     | Hs.460298       | NM_018119         | HPRD:15155        |
| hESC-3merge_in_peak_18                     | chr1   | 147825484 | 147825983 | intron (NR_102404, intron 2)      | IRNA-Gln-CAG [RNA] [RNA]              | -19055          | NR_049810        | 100847044 | Hs.460298       | NR_049810         |                   |
| hESC-3merge_in_peak_311                    | chr6   | 28863819  | 28864318  | promoter-TSS (NR_104117)          | promoter-TSS (NR_104117)              | -239            | NR_104117        | 414760    | Hs.211005       | NR_104117         |                   |
| hESC-3merge_in_peak_164                    | chr17  | 73029720  | 73030219  | intron (NR_110895, intron 1 of 2) | intron (NR_110895, intron 1 of 2)     | 1307            | NR_110895        | 25510     | Hs.514468       | NM_015533         | HPRD:17176        |
| hESC-3merge_in_peak_306                    | chr6   | 28763462  | 28764021  | Intergenic                        | IRNA-Ala-GCY [RNA] [RNA]              | 6765            | NR_033379        | 401242    | Hs.448285       | NR_033379         | ENSG00000225595   |
| hESC-3merge_in_peak_253                    | chr6   | 27305400  | 27305939  | Intergenic                        | IRNA-Met [RNA] [RNA]                  | 8249            | NR_045612        | 387316    | Hs.326753       | NM_032030         |                   |
| hESC-3merge_in_peak_125                    | chr16  | 686502    | 687001    | promoter-TSS (NM_033266)          | promoter-TSS (NM_033266)              | -385            | NR_109979        | 84326     | Hs.239500       | NM_032366         | HPRD:17482        |
| hESC-3merge_in_peak_156                    | chr17  | 36907797  | 36908296  | promoter-TSS (NM_002795)          | promoter-TSS (NM_002795)              | -920            | NR_104194        | 5691      | Hs.82793        | NM_002795         | HPRD:03709        |
| hESC-3merge_in_peak_247                    | chr6   | 27205117  | 27205616  | Intergenic                        | IRNA-Ile-ATT [RNA] [RNA]              | -10136          | NM_005865        | 10279     | Hs.274407       | NM_005865         | HPRD:06205        |
| hESC-3merge_in_peak_254                    | chr6   | 27302565  | 27303064  | Intergenic                        | IRNA-Lys-AAA [RNA] [RNA]              | 10274           | NR_045612        | 387316    | Hs.326753       | NM_032030         |                   |
| hESC-3merge_in_peak_66                     | chr10  | 22518230  | 22518729  | Intergenic                        | IRNA-Asn-AC [RNA] [RNA]               | -19567          | NM_001199        | 340900    | Hs.450519       | NM_001199938      | ENSG00000223601   |
| hESC-3merge_in_peak_303                    | chr6   | 28725942  | 28726441  | Intergenic                        | IRNA-Ala-GCA [RNA] [RNA]              | 105263          | NR_033379        | 401242    | Hs.448285       | NR_033379         | ENSG00000225595   |
| hESC-3merge_in_peak_296                    | chr6   | 28633462  | 28633961  | Intergenic                        | IRNA-Ala-GCY [RNA] [RNA]              | 108599          | NM_052923        | 11482     | Hs.176980       | NM_052923         | HPRD:11720        |
| hESC-3merge_in_peak_218                    | chr6   | 26322866  | 26323365  | Intergenic                        | IRNA-Arg-CGA [RNA] [RNA]              | 97388           | NM_003543        | 8365      | Hs.591790       | NM_003543         | HPRD:11919        |
| hESC-3merge_in_peak_74                     | chr11  | 59323667  | 59324166  | Intergenic                        | IRNA-Lys-AAA [RNA] [RNA]              | 38715           | NR_036120        | 100422880 | Hs.036120       | NR_036120         |                   |
| hESC-3merge_in_peak_143                    | chr17  | 8022269   | 8022768   | promoter-TSS (NM_001165960)       | promoter-TSS (NM_001165960)           | -284            | NM_001165        | 59344     | Hs.232770       | NM_001165         | HPRD:06231        |
| hESC-3merge_in_peak_140                    | chr16  | 83983941  | 83984440  | Intergenic                        | Intergenic                            | -2637           | NM_182981        | 29948     | Hs.128055       | NM_183770         | HPRD:06412        |
| hESC-3merge_in_peak_122                    | chr15  | 79152714  | 79153213  | Intergenic                        | IRNA-Lys-AAG [RNA] [RNA]              | -12160          | NM_001265        | 10933     | Hs.374503       | NM_006791         | HPRD:09532        |
| hESC-3merge_in_peak_67                     | chr10  | 23285991  | 23286490  | intron (NM_173081, intron 5)      | SI [RNA] [RNA]                        | 69287           | NM_001282        | 219681    | Hs.659807       | NM_173081         | HPRD:12487        |
| hESC-3merge_in_peak_171                    | chr19  | 4723864   | 4724363   | promoter-TSS (NM_139159)          | promoter-TSS (NM_139159)              | -258            | NM_139159        | 91039     | Hs.515081       | NM_139159         | HPRD:07001        |
| hESC-3merge_in_peak_215                    | chr6   | 2629697   | 2630186   | Intergenic                        | IRNA-Arg-CGA [RNA] [RNA]              | -14209          | NM_03543         | 8365      | Hs.591790       | NM_03543          | HPRD:11919        |
| hESC-3merge_in_peak_52                     | chr1   | 228756974 | 228757473 | Intergenic                        | CpG                                   | -23171          | NR_037962        | 58480     | Hs.647774       | NM_021205         | HPRD:06965        |
| hESC-3merge_in_peak_243                    | chr6   | 27144743  | 27145242  | Intergenic                        | Intergenic                            | 29587           | NR_036096        | 100422934 | Hs.036096       | miRBase:MI0014167 |                   |
| hESC-3merge_in_peak_126                    | chr16  | 3200449   | 3200948   | Intergenic                        | IRNA-Arg-CGG [RNA] [RNA]              | 15564           | NM_001134        | 7760      | Hs.115284       | NM_004220         | HPRD:12224        |
| hESC-3merge_in_peak_86                     | chr12  | 98897062  | 98897561  | intron (NR_038383, intron 1)      | IRNA-Asp-GAY [RNA] [RNA]              | 322             | NR_038383        | 643770    | Hs.129589       | NR_038383         | ENSG00000245017   |
| hESC-3merge_in_peak_333                    | chr7   | 149332573 | 149333072 | Intergenic                        | IRNA-Cys-TG [RNA] [RNA]               | -10941          | NR_027789        | 79970     | Hs.520785       | NM_024210         | HPRD:07791        |
| hESC-3merge_in_peak_184                    | chr2   | 131094500 | 131094999 | TTS (NM_032357)                   | TTS (NM_032357)                       | 5207            | NM_032357        | 84317     | Hs.104203       | NM_032357         | HPRD:14428        |
| hESC-3merge_in_peak_38                     | chr1   | 161438938 | 161439437 | Intergenic                        | CpG                                   | -36018          | NM_021642        | 2212      | Hs.352642       | NM_021642         | HPRD:09006        |
| hESC-3merge_in_peak_50                     | chr16  | 5731261   | 5731760   | Intergenic                        | IRNA-Leu-CTG [RNA] [RNA]              | 7235            | NR_111924        | 54960     | Hs.623215       | NR_111924         | HPRD:11854        |
| hESC-3merge_in_peak_30                     | chr1   | 228752517 | 228753016 | Intergenic                        | CpG                                   | -27628          | NR_037962        | 58480     | Hs.647774       | NM_021205         | HPRD:06965        |
| hESC-3merge_in_peak_208                    | chr5   | 180618477 | 180618976 | intron (NR_108031, intron 1)      | CpG-21583                             | 182             | NR_108031        | 102577426 | Hs.277359       | NR_108031         |                   |
| hESC-3merge_in_peak_111                    | chr14  | 58706393  | 58706892  | Intergenic                        | IRNA-Lys-AAG [RNA] [RNA]              | -4881           | NM_002788        | 5684      | Hs.558799       | NM_002788         | HPRD:01463        |
| hESC-3merge_in_peak_47                     | chr1   | 228745802 | 228746301 | Intergenic                        | CpG                                   | -34343          | NR_037962        | 58480     | Hs.647774       | NM_021205         | HPRD:06965        |
| hESC-3merge_in_peak_75                     | chr11  | 59327590  | 59328089  | Intergenic                        | IRNA-Lys-AAA [RNA] [RNA]              | 34792           | NR_036120        | 100422880 | Hs.036120       | NR_036120         |                   |
| hESC-3merge_in_peak_263                    | chr6   | 27520993  | 27521492  | Intergenic                        | IRNA-Ser-CYT [RNA] [RNA]              | -80345          | NM_007149        | 7738      | Hs.158174       | NM_007149         | HPRD:03785        |
| hESC-3merge_in_peak_160                    | chr17  | 37309767  | 37310266  | Intergenic                        | IRNA-Cys-TG [RNA] [RNA]               | 2114            | NM_004605        | 57235     | Hs.125036       | NM_004605         | HPRD:08439        |
| hESC-3merge_in_peak_210                    | chr1   | 14923447  | 14923946  | Intergenic                        | IRNA-Gly-GGC [RNA] [RNA]              | 7235            | NR_111924        | 54960     | Hs.623215       | NR_111924         | HPRD:11854        |
| hESC-3merge_in_peak_174                    | chr19  | 6066565   | 6067064   | intron (NM_000635, intron 1 of 2) | intron (NM_000635, intron 1 of 2)     | 43850           | NM_000635        | 64905     | Hs.465709       | NM_000635         | HPRD:00824        |
| hESC-3merge_in_peak_91                     | chr13  | 31247889  | 31248388  | Intergenic                        | IRNA-Asn-AC [RNA] [RNA]               | -39477          | NM_001204        | 241       | Hs.507658       | NM_001269         | HPRD:04742        |
| hESC-3merge_in_peak_278                    | chr6   | 27694251  | 27694750  | Intergenic                        | IRNA-Thr-ACY [RNA] [RNA]              | 32642           | NR_038292        | 100507173 | Hs.635987       | NR_038292         |                   |
| hESC-3merge_in_peak_261                    | chr6   | 27513264  | 27513763  | Intergenic                        | IRNA-Ser-TCA [RNA] [RNA]              | -72616          | NM_007149        | 7738      | Hs.158174       | NM_007149         | HPRD:03785        |
| hESC-3merge_in_peak_37                     | chr1   | 161435061 | 161435560 | Intergenic                        | CpG                                   | -38995          | NM_021642        | 2212      | Hs.352642       | NM_021642         | HPRD:09006        |
| hESC-3merge_in_peak_272                    | chr6   | 27618491  | 27618990  | Intergenic                        | IRNA-Val-GTY [RNA] [RNA]              | -43074          | NR_038293        | 100507173 | Hs.635987       | NR_038292         |                   |
| hESC-3merge_in_peak_238                    | chr6</ |           |           |                                   |                                       |                 |                  |           |                 |                   |                   |

|                           |       |           |           |                                 |                             |         |           |           |           |                   |                   |
|---------------------------|-------|-----------|-----------|---------------------------------|-----------------------------|---------|-----------|-----------|-----------|-------------------|-------------------|
| HESC-3merge_insp_peak_289 | chr6  | 2856949   | 2855748   | Intergenic                      | IRNA-Gln-CAA [RNA] [RNA]    | -2086   | NM_052923 | 114821    | Hs.176980 | NM_052923         | HPHD:17120        |
| HESC-3merge_insp_peak_28  | chr1  | 16136966  | 161369765 | Intergenic                      | CpG                         | -31842  | NM_001013 | 257177    | Hs.534593 | NM_001013625      | HPHD:13257        |
| HESC-3merge_insp_peak_205 | chr5  | 18060835  | 180601334 | Intergenic                      | IRNA-Leu-CTY [RNA] [RNA]    | 17824   | NR_108031 | 102577426 | Hs.273759 | NR_108031         | HPHD:06930        |
| HESC-3merge_insp_peak_232 | chr3  | 16949303  | 16949303  | Promoter-TSS (NR_03370)         | IRNA-Gln-CAG [RNA] [RNA]    | -7588   | NM_003633 | 10473     | Hs.236774 | NM_003633         | HPHD:06930        |
| HESC-3merge_insp_peak_6   | chr1  | 17188187  | 17188676  | Intergenic                      | IRNA-Gly-CGG [RNA] [RNA]    | -2920   | NR_037446 | 10050076  | Hs.027446 | NR_037446         | mIRBase:MI0016076 |
| HESC-3merge_insp_peak_275 | chr6  | 27640021  | 27640520  | Intergenic                      | IRNA-Ser-TCG [RNA] [RNA]    | -21544  | NR_038293 | 10050173  | Hs.635987 | NR_038292         | HPHD:06965        |
| HESC-3merge_insp_peak_305 | chr6  | 28758287  | 28758786  | Intergenic                      | IRNA-Phe-TY [RNA] [RNA]     | 72918   | NR_033379 | 401242    | Hs.448285 | NR_033379         | HPHD:06965        |
| HESC-3merge_insp_peak_230 | chr6  | 26571861  | 26572360  | Intergenic                      | IRNA-Ala-GCY [RNA] [RNA]    | -25061  | NM_013375 | 29777     | Hs.254406 | NM_013375         | HPHD:16469        |
| HESC-3merge_insp_peak_54  | chr1  | 228761442 | 228761941 | Intergenic                      | CpG                         | -18703  | NR_037962 | 58480     | Hs.647774 | NM_021205         | HPHD:06965        |
| HESC-3merge_insp_peak_325 | chr7  | 128423285 | 128423784 | Intergenic                      | IRNA-Pro-CCY [RNA] [RNA]    | -7690   | NM_001708 | 611       | Hs.656404 | NM_001708         | HPHD:01836        |
| HESC-3merge_insp_peak_260 | chr6  | 27487004  | 27487583  | Intergenic                      | IRNA-Gln-CAG [RNA] [RNA]    | -46436  | NM_007149 | 7738      | Hs.158174 | NM_007149         | HPHD:03785        |
| HESC-3merge_insp_peak_195 | chr6  | 26554143  | 26554642  | Intergenic                      | IRNA-Ile-ATT [RNA] [RNA]    | 15820   | NM_006353 | 10473     | Hs.236774 | NM_006353         | HPHD:06965        |
| HESC-3merge_insp_peak_225 | chr4  | 19023948  | 19023047  | Intergenic                      | CpG                         | -350563 | NR_121679 | 101928971 | Hs.531964 | NR_121679         | ENSG00000250739   |
| HESC-3merge_insp_peak_78  | chr11 | 66189019  | 66189518  | Intron (NM_178864, intron 3)    | IRNA-Cys-TGY [RNA] [RNA]    | 793     | NR_178864 | 266743    | Hs.256036 | NM_178864         | HPHD:12260        |
| HESC-3merge_insp_peak_211 | chr5  | 18064503  | 180645552 | Intergenic                      | IRNA-Val-GTY [RNA] [RNA]    | 4331    | NR_039781 | 10061642  | Hs.039781 | mIRBase:MI0017265 | HPHD:17779        |
| HESC-3merge_insp_peak_102 | chr14 | 21121057  | 21121556  | Intergenic                      | IRNA-Tyr-TAC [RNA] [RNA]    | -11456  | NM_001001 | 341799    | Hs.513132 | NM_001001968      | HPHD:17779        |
| HESC-3merge_insp_peak_300 | chr6  | 28072995  | 28073494  | Intergenic                      | IRNA-Ala-GCY [RNA] [RNA]    | 128210  | NR_033379 | 401242    | Hs.448285 | NR_033379         | ENSG0000025595    |
| HESC-3merge_insp_peak_79  | chr11 | 68227403  | 68227902  | Promoter-TSS (NM_00116)         | Promoter-TSS (NM_00116)     | -534    | NM_001164 | 56291     | Hs.503022 | NM_001164         | HPHD:10703        |
| HESC-3merge_insp_peak_39  | chr1  | 161493427 | 161493926 | Promoter-TSS (NM_002155)        | Promoter-TSS (NM_002155)    | -360    | NM_02155  | 3310      | Hs.654614 | NM_02155          | HPHD:00775        |
| HESC-3merge_insp_peak_112 | chr14 | 73429449  | 73429948  | Intergenic                      | IRNA-Cys-TGY [RNA] [RNA]    | 23966   | NM_178441 | 5340      | Hs.335106 | NM_021260         | HPHD:12017        |
| HESC-3merge_insp_peak_136 | chr16 | 70812719  | 70813218  | Intron (NM_018052, intron 3)    | IRNA-Gly-GGY [RNA] [RNA]    | 22093   | NM_018052 | 55697     | Hs.445061 | NM_018052         | HPHD:07660        |
| HESC-3merge_insp_peak_69  | chr10 | 69524072  | 69524571  | Intergenic                      | IRNA-Ser-TCG [RNA] [RNA]    | -68372  | NM_013266 | 29119     | Hs.21375  | NM_013266         | HPHD:09639        |
| HESC-3merge_insp_peak_242 | chr6  | 27129880  | 27130349  | Intergenic                      | IRNA-Thr-ACY [RNA] [RNA]    | 14694   | NR_036096 | 100422934 | Hs.036096 | mIRBase:MI0014167 | HPHD:06965        |
| HESC-3merge_insp_peak_80  | chr11 | 75946636  | 75947135  | Intergenic                      | CpG                         | -29311  | NM_004626 | 7481      | Hs.108219 | NM_004626         | HPHD:04741        |
| HESC-3merge_insp_peak_124 | chr15 | 89878104  | 89878603  | Promoter-TSS (NM_001126131)     | Promoter-TSS (NM_001126131) | -327    | NM_002693 | 5428      | Hs.706868 | NM_002693         | HPHD:01438        |
| HESC-3merge_insp_peak_262 | chr6  | 27515289  | 27515788  | Intergenic                      | IRNA-Gln-CAG [RNA] [RNA]    | -74641  | NM_007149 | 7738      | Hs.158174 | NM_007149         | HPHD:03785        |
| HESC-3merge_insp_peak_283 | chr6  | 27870462  | 27870961  | Intergenic                      | IRNA-Gly-CGG [RNA] [RNA]    | 9663    | NM_03057  | 81697     | Hs.307111 | NM_03057          | HPHD:17695        |
| HESC-3merge_insp_peak_117 | chr5  | 2670154   | 26702042  | Intergenic                      | Intergenic                  | -41812  | NR_0969   | 79693     | Hs.136280 | NR_0969           | HPHD:06965        |
| HESC-3merge_insp_peak_34  | chr1  | 16142155  | 16142454  | Intergenic                      | CpG                         | -50801  | NM_021642 | 2212      | Hs.352642 | NM_021642         | HPHD:09006        |
| HESC-3merge_insp_peak_150 | chr17 | 8124660   | 8125159   | Intron (NR_026951, intron 3)    | CpG                         | 2452    | NR_026951 | 284029    | Hs.121692 | NM_173621         | HPHD:08755        |
| HESC-3merge_insp_peak_222 | chr6  | 26529317  | 26533416  | Intergenic                      | IRNA-Thr-ACY [RNA] [RNA]    | -5406   | NM_006353 | 10473     | Hs.236774 | NM_006353         | HPHD:06965        |
| HESC-3merge_insp_peak_141 | chr16 | 87417401  | 87417900  | Promoter-TSS (NM_024735)        | Promoter-TSS (NM_024735)    | -251    | NM_024735 | 79791     | Hs.567582 | NM_024735         | HPHD:17779        |
| HESC-3merge_insp_peak_179 | chr19 | 54370563  | 54371062  | Promoter-TSS (NM_001290190)     | Promoter-TSS (NM_001290190) | -307    | NM_001290 | 91663     | Hs.380906 | NM_138373         | HPHD:14792        |
| HESC-3merge_insp_peak_10  | chr1  | 14539307  | 14539806  | Intron (NM_001039703, intron 1) | IRNA-Lys-AAG [RNA] [RNA]    | -17635  | NM_213653 | 148738    | Hs.632436 | NM_145277         | HPHD:10521        |
| HESC-3merge_insp_peak_92  | chr13 | 41363464  | 413635143 | Promoter-TSS (NM_007187)        | Promoter-TSS (NM_007187)    | -804    | NM_007187 | 11193     | Hs.411300 | NM_007187         | HPHD:16086        |
| HESC-3merge_insp_peak_11  | chr5  | 40885803  | 40886302  | Promoter-TSS (NM_144508)        | Promoter-TSS (NM_144508)    | -205    | NM_144508 | 57082     | Hs.136280 | NM_144508         | HPHD:10634        |
| HESC-3merge_insp_peak_266 | chr6  | 27559359  | 27559858  | Intergenic                      | IRNA-Lys-AAA [RNA] [RNA]    | -102206 | NR_038293 | 10050173  | Hs.635987 | NR_038292         | HPHD:06965        |
| HESC-3merge_insp_peak_84  | chr12 | 5658363   | 56584132  | Promoter-TSS (NM_003075)        | Promoter-TSS (NM_003075)    | -861    | NM_003075 | 6601      | Hs.236030 | NM_003075         | HPHD:03437        |
| HESC-3merge_insp_peak_290 | chr6  | 28564885  | 28565384  | Intergenic                      | IRNA-Ser-AGY [RNA] [RNA]    | -10022  | NM_052923 | 114821    | Hs.176980 | NM_052923         | HPHD:17120        |
| HESC-3merge_insp_peak_36  | chr1  | 161431603 | 161432102 | Intergenic                      | CpG                         | -43353  | NM_021642 | 2212      | Hs.352642 | NM_021642         | HPHD:09006        |
| HESC-3merge_insp_peak_81  | chr11 | 122430446 | 122430945 | Intergenic                      | IRNA-Lys-AAA [RNA] [RNA]    | -95703  | NM_032873 | 84959     | Hs.444075 | NM_032873         | HPHD:10663        |
| HESC-3merge_insp_peak_88  | chr12 | 125406108 | 125406607 | Intergenic                      | IRNA-Ala-GCC [RNA] [RNA]    | 6264    | NR_049820 | 100847004 | Hs.049820 | mIRBase:MI0018167 | HPHD:06965        |
| HESC-3merge_insp_peak_227 | chr6  | 26555279  | 26555778  | Intergenic                      | IRNA-Pro-CCY [RNA] [RNA]    | 16956   | NM_003633 | 10473     | Hs.236774 | NM_003633         | HPHD:06965        |
| HESC-3merge_insp_peak_228 | chr16 | 2844232   | 28442635  | Intergenic                      | IRNA-Thr-ACC [RNA] [RNA]    | -31106  | NM_001245 | 222669    | Hs.712841 | NM_00101245       | ENSG00000187987   |
| HESC-3merge_insp_peak_154 | chr17 | 19411279  | 19411778  | Intergenic                      | IRNA-Trp-TGG [RNA] [RNA]    | -25639  | NM_018242 | 55244     | Hs.232054 | NM_018242         | HPHD:07700        |
| HESC-3merge_insp_peak_51  | chr1  | 22875475  | 22875974  | Intergenic                      | CpG                         | -25370  | NR_037962 | 58480     | Hs.647774 | NM_021205         | HPHD:06965        |
| HESC-3merge_insp_peak_158 | chr17 | 37023673  | 37024172  | Intergenic                      | IRNA-Cys-TGY [RNA] [RNA]    | -2190   | NR_073384 | 3927      | Hs.741156 | NM_006148         | HPHD:04229        |
| HESC-3merge_insp_peak_99  | chr14 | 21098364  | 21098863  | Intergenic                      | IRNA-Tyr-TAC [RNA] [RNA]    | 11237   | NM_001001 | 341799    | Hs.513132 | NM_001001968      | HPHD:17779        |
| HESC-3merge_insp_peak_64  | chr1  | 249167870 | 249168369 | Intergenic                      | IRNA-Leu-TTG [RNA] [RNA]    | -14804  | NM_001193 | 56557     | Hs.377705 | NM_001193         | HPHD:07922        |
| HESC-3merge_insp_peak_148 | chr17 | 8097019   | 8097118   | TTS (NM_017622)                 | TTS (NM_017622)             | 705     | NR_039746 | 100616406 | Hs.039746 | NR_039746         | HPHD:06965        |
| HESC-3merge_insp_peak_124 | chr12 | 12541167  | 125412166 | Intergenic                      | IRNA-Asp-GAT [RNA] [RNA]    | 11854   | NR_049820 | 100847004 | Hs.049820 | mIRBase:MI0018167 | HPHD:06965        |
| HESC-3merge_insp_peak_166 | chr17 | 80452360  | 80452859  | Intergenic                      | IRNA-Met-I [RNA] [RNA]      | -24985  | NM_045134 | 3607      | Hs.591140 | NM_045134         | HPHD:09892        |
| HESC-3merge_insp_peak_334 | chr7  | 14934381  | 149344320 | Intergenic                      | IRNA-Cys-TGY [RNA] [RNA]    | -22189  | NR_027789 | 79970     | Hs.520785 | NM_024910         | HPHD:07791        |
| HESC-3merge_insp_peak_56  | chr1  | 22876529  | 22876624  | Intergenic                      | CpG                         | -14220  | NR_037962 | 58480     | Hs.647774 | NM_021205         | HPHD:06965        |
| HESC-3merge_insp_peak_287 | chr6  | 28505189  | 28505688  | Intergenic                      | IRNA-Ile-ATA [RNA] [RNA]    | 11649   | NR_003996 | 2880      | Hs.248129 | NM_001509         | HPHD:11941        |
| HESC-3merge_insp_peak_279 | chr6  | 27720962  | 27721461  | Intergenic                      | IRNA-Val-GTY [RNA] [RNA]    | -8312   | NR_038929 | 10031289  | Hs.200573 | NR_038929         | HPHD:06965        |
| HESC-3merge_insp_peak_33  | chr1  | 161420268 | 161420767 | Intergenic                      | CpG                         | -54688  | NM_021642 | 2212      | Hs.352642 | NM_021642         | HPHD:09006        |
| HESC-3merge_insp_peak_85  | chr12 | 96429596  | 96430095  | Promoter-TSS (NM_000895)        | Promoter-TSS (NM_000895)    | -406    | NM_000895 | 4048      | Hs.524648 | NM_000895         | HPHD:01056        |
| HESC-3merge_insp_peak_209 | chr6  | 18663154  | 18663653  | Intergenic                      | IRNA-Val-GTA [RNA] [RNA]    | 8178    | NR_048713 | 10473     | Hs.487113 | NR_048713         | HPHD:16468        |
| HESC-3merge_insp_peak_130 | chr16 | 3241770   | 3242269   | Intergenic                      | IRNA-Pro-CCY [RNA] [RNA]    | -12228  | NM_012360 | 4992      | Hs.664502 | NM_012360         | HPHD:09125        |
| HESC-3merge_insp_peak_237 | chr6  | 26745035  | 26745534  | Intergenic                      | IRNA-Ile-ATT [RNA] [RNA]    | -85304  | NM_001242 | 79692     | Hs.126280 | NM_024639         | HPHD:06965        |
| HESC-3merge_insp_peak_240 | chr6  | 27059319  | 27059818  | Intergenic                      | IRNA-Pro-CCG [RNA] [RNA]    | 41007   | NM_021058 | 8970      | Hs.591807 | NM_021058         | HPHD:06965        |
| HESC-3merge_insp_peak_328 | chr7  | 148606165 | 148606664 | Intergenic                      | HY4 [sRNA] [sRNA]           | 65368   | NM_004911 | 9601      | Hs.93659  | NM_004911         | HPHD:06501        |
| HESC-3merge_insp_peak_309 | chr6  | 28831230  | 28831729  | Promoter-TSS (NR_033379.3)      | Promoter-TSS (NR_033379.3)  | -25     | NR_033379 | 401242    | Hs.448285 | NR_033379         | ENSG0000025595    |
| HESC-3merge_insp_peak_46  | chr1  | 222638160 | 222638659 | Intergenic                      | IRNA-Thr-ACA [RNA] [RNA]    | 83035   | NM_024746 | 79802     | Hs.665660 | NM_024746         | HPHD:08887        |
| HESC-3merge_insp_peak_216 | chr6  | 26313118  | 26313617  | Intergenic                      | IRNA-Met-I [RNA] [RNA]      | -27640  | NM_003543 | 8365      | Hs.591790 | NM_003543         | HPHD:11919        |
| HESC-3merge_insp_peak_308 | chr6  | 28805995  | 28806494  | Intergenic                      | IRNA-Ala-GCY [RNA] [RNA]    | 25210   | NR_033379 | 401242    | Hs.448285 | NR_033379         | ENSG0000025595    |
| HESC-3merge_insp_peak_298 | chr6  | 2869312   | 28694111  | Intergenic                      | IRNA-Thr-TAC [RNA] [RNA]    | 137592  | NM_001479 | 401242    | Hs.448285 | NR_033379         | ENSG0000025595    |
| HESC-3merge_insp_peak_244 | chr6  | 27181391  | 27181890  | Intergenic                      | IRNA-Arg-CGY [RNA] [RNA]    | -33862  | NM_005865 | 10273     | Hs.274407 | NM_005865         | HPHD:06205        |
| HESC-3merge_insp_peak_304 | chr6  | 28753226  | 28753725  | Intergenic                      | IRNA-Ala-GCA [RNA] [RNA]    | 73879   | NR_033379 | 401242    | Hs.448285 | NR_033379         | ENSG0000025595    |
| HESC-3merge_insp_peak_182 | chr2  | 43037486  | 43037985  | Intergenic                      | IRNA-Ile-ATA [RNA] [RNA]    | -17984  | NM_012205 | 23498     | Hs.368805 | NM_012205         | HPHD:05158        |
| HESC-3merge_insp_peak_43  | chr1  | 167683736 | 167684235 | Intergenic                      | IRNA-Pro-CCG [RNA] [RNA]    | -7202   | NM_024569 | 9019      | Hs.493919 | NM_003953         | HPHD:05086        |
| HESC-3merge_insp_peak_219 | chr6  | 26328150  | 26328649  | Intergenic                      | IRNA-Arg-CY [RNA] [RNA]     | -36988  | NM_001197 | 11118     | Hs.376046 | NM_007047         | HPHD:12547        |
| HESC-3merge_insp_peak_202 | chr5  | 18052429  | 18052478  | Intergenic                      | IRNA-Leu-CTY [RNA] [RNA]    | 27816   | NM_001258 | 26677     | Hs.742585 | NM_00152823       | ENSG00000185372   |
| HESC-3merge_insp_peak_229 | chr6  | 26566279  |           |                                 |                             |         |           |           |           |                   |                   |

|                          |       |           |           |                                   |                                   |         |           |           |                      |                              |
|--------------------------|-------|-----------|-----------|-----------------------------------|-----------------------------------|---------|-----------|-----------|----------------------|------------------------------|
| hESC-3merge_inp_peak_200 | chr5  | 140099617 | 140091116 | promoter-TSS (NR_026703)          | promoter-TSS (NR_026703)          | 5       | NR_026703 | 56664     | NR_026703            | ENSG00000199990              |
| hESC-3merge_inp_peak_168 | chr19 | 893291    | 893790    | promoter-TSS (NM_005481)          | promoter-TSS (NM_005481)          | 56      | NR_125730 | 103625684 | NR_125730            |                              |
| hESC-3merge_inp_peak_317 | chr6  | 28949746  | 28950245  | Intergenic                        | IRNA-Glu-GAG [RNA] [RNA]          | 23042   | NM_001010 | 282890    | Hs.148218            | NM_001010877 HPRD:18325      |
| hESC-3merge_inp_peak_107 | chr14 | 21151363  | 21152462  | promoter-TSS (NM_001145)          | promoter-TSS (NM_001145)          | -124    | NM_001145 | 282       | Hs.283749            | NM_001145 HPRD:00105         |
| hESC-3merge_inp_peak_132 | chr16 | 22206797  | 22207296  | Intergenic                        | IRNA-Leu-CTA [RNA] [RNA]          | -10546  | NM_013302 | 29904     | Hs.498892            | NM_013302 HPRD:04082         |
| hESC-3merge_inp_peak_45  | chr1  | 204475432 | 204475931 | Intergenic                        | IRNA-Lys-AAA [RNA] [RNA]          | -9826   | NM_001278 | 4194      | Hs.497492            | NM_001278 HPRD:04082         |
| hESC-3merge_inp_peak_212 | chr5  | 180648757 | 180649256 | TTS (NR_039781)                   | TTS (NR_039781)                   | 627     | NR_039781 | 100616342 | NR_039781            | miRBase:MI0017265            |
| hESC-3merge_inp_peak_151 | chr17 | 8125319   | 8125818   | intron (NR_026951, intron 1)      | IRNA-Asp-GAV [RNA] [RNA]          | 1793    | NR_026951 | 284029    | Hs.121692            | NM_173621 HPRD:08755         |
| hESC-3merge_inp_peak_312 | chr6  | 28908638  | 28909137  | Intergenic                        | IRNA-Leu-TTG [RNA] [RNA]          | -2674   | NR_103538 | 729583    | Hs.453549            | NR_103538 HPRD:08755         |
| hESC-3merge_inp_peak_225 | chr6  | 26553524  | 26554023  | Intergenic                        | IRNA-Ala-GCC [RNA] [RNA]          | 15201   | NM_006353 | 10473     | Hs.236774            | NM_006353 HPRD:08755         |
| hESC-3merge_inp_peak_228 | chr6  | 26556578  | 26557077  | Intergenic                        | IRNA-Lys-AAG [RNA] [RNA]          | 18255   | NM_006353 | 10473     | Hs.236774            | NM_006353 HPRD:08755         |
| hESC-3merge_inp_peak_307 | chr6  | 28775392  | 28775891  | Intergenic                        | IRNA-Phe-TTY [RNA] [RNA]          | 55813   | NR_033379 | 401242    | Hs.448285            | NR_033379 ENSG00000225595    |
| hESC-3merge_inp_peak_268 | chr6  | 27570140  | 27570639  | Intergenic                        | IRNA-Leu-TTG [RNA] [RNA]          | -91425  | NR_038293 | 100507173 | Hs.635987            | NR_038292 HPRD:08755         |
| hESC-3merge_inp_peak_77  | chr11 | 66115400  | 66115899  | promoter-TSS (NM_006876)          | promoter-TSS (NM_006876)          | -488    | NM_006876 | 11041     | Hs.8526              | NM_006876 HPRD:09270         |
| hESC-3merge_inp_peak_301 | chr6  | 28710524  | 28711023  | Intergenic                        | IRNA-Arg-CGG [RNA] [RNA]          | 120681  | NR_033379 | 401242    | Hs.448285            | NR_033379 ENSG00000225595    |
| hESC-3merge_inp_peak_282 | chr6  | 27764335  | 27764834  | Intergenic                        | IRNA-Gln-CAA [RNA] [RNA]          | 12025   | NM_003519 | 8340      | Hs.137594            | NM_003519 HPRD:11898         |
| hESC-3merge_inp_peak_103 | chr14 | 21125422  | 21125921  | Intergenic                        | IRNA-Tyr-TAC [RNA] [RNA]          | -15821  | NM_001001 | 341799    | Hs.513132            | NM_001001968 HPRD:17779      |
| hESC-3merge_inp_peak_194 | chr4  | 1422460   | 1422959   | Intergenic                        | Intergenic                        | -22479  | NM_001290 | 54729     | Hs.526396            | NM_00129079 HPRD:11167       |
| hESC-3merge_inp_peak_318 | chr6  | 28956568  | 28957067  | Intergenic                        | IRNA-Leu-CTY [RNA] [RNA]          | 16220   | NM_001010 | 282890    | Hs.148218            | NM_001010877 HPRD:18325      |
| hESC-3merge_inp_peak_220 | chr6  | 26330281  | 26330780  | Intergenic                        | IRNA-Met-I [RNA] [RNA]            | -34857  | NM_001197 | 11118     | Hs.376046            | NM_007047 HPRD:12547         |
| hESC-3merge_inp_peak_73  | chr11 | 59319012  | 59319511  | Intergenic                        | IRNA-Leu-TTA [RNA] [RNA]          | 36875   | NM_001004 | 390199    | Hs.553757            | NM_001004711 HPRD:17728      |
| hESC-3merge_inp_peak_165 | chr17 | 73030980  | 73031479  | intron (NR_110835, intron 1)      | IRNA-Arg-CGG [RNA] [RNA]          | 2567    | NR_110835 | 23510     | Hs.514468            | NM_015353 HPRD:17176         |
| hESC-3merge_inp_peak_231 | chr6  | 26575595  | 26576094  | Intergenic                        | IRNA-Tyr-TAC [RNA] [RNA]          | -21327  | NM_013375 | 29777     | Hs.254406            | NM_013375 HPRD:16469         |
| hESC-3merge_inp_peak_320 | chr6  | 12610181  | 12610680  | promoter-TSS (NM_00119619)        | promoter-TSS (NM_00119619)        | -877    | NM_001196 | 135112    | Hs.171426            | NM_018182 HPRD:14814         |
| hESC-3merge_inp_peak_259 | chr6  | 27473886  | 27473886  | Intergenic                        | IRNA-Ser-TCA [RNA] [RNA]          | -32739  | NM_007149 | 7738      | Hs.158174            | NM_007149 HPRD:03785         |
| hESC-3merge_inp_peak_336 | chr7  | 149388043 | 149388542 | Intergenic                        | IRNA-Cys-TGY [RNA] [RNA]          | -23810  | NM_032534 | 84626     | Hs.299560            | NM_032534 HPRD:11167         |
| hESC-3merge_inp_peak_198 | chr5  | 672673    | 673172    | intron (NM_007030, intron 2 of 2) | intron (NM_007030, intron 2 of 2) | 20588   | NM_007030 | 11076     | Hs.481466            | NM_007030 HPRD:18522         |
| hESC-3merge_inp_peak_82  | chr12 | 6040806   | 6041305   | intron (NM_00127859, intron 1)    | IRNA-GA [Low complexity] [Low c   | 13370   | NM_001278 | 57103     | Hs.148970            | NM_020373 HPRD:11634         |
| hESC-3merge_inp_peak_20  | chr1  | 148247908 | 148248407 | intron (NR_102404, intron 1)      | IRNA-Asn-AAC [RNA] [RNA]          | -45621  | NM_001164 | 645142    | Hs.790589            | NM_001164261 ENSG00000256374 |
| hESC-3merge_inp_peak_255 | chr6  | 27446376  | 27446875  | Intergenic                        | IRNA-Ser-TCT [RNA] [RNA]          | -5728   | NM_007149 | 7738      | Hs.158174            | NM_007149 HPRD:03785         |
| hESC-3merge_inp_peak_329 | chr7  | 148684074 | 148684573 | Intergenic                        | HY1 [cRNA] [cRNA]                 | 41459   | NM_004911 | 9601      | Hs.93659             | NM_004911 HPRD:06501         |
| hESC-3merge_inp_peak_277 | chr6  | 27655468  | 27656267  | Intergenic                        | IRNA-Ile-ATT [RNA] [RNA]          | -5797   | NR_038293 | 100507173 | Hs.635987            | NR_038292 HPRD:08755         |
| hESC-3merge_inp_peak_118 | chr15 | 45490574  | 45491073  | intron (NM_138356, intron 1)      | IRNA-His-CAY [RNA] [RNA]          | 2550    | NM_138356 | 90525     | Hs.310399            | NM_138356 HPRD:14272         |
| hESC-3merge_inp_peak_155 | chr17 | 29876900  | 29877399  | Intergenic                        | IRNA-Thr-ACC [RNA] [RNA]          | -9866   | NR_029710 | 406968    | NR_029710            | miRBase:MI0000487            |
| hESC-3merge_inp_peak_273 | chr6  | 27636190  | 27636689  | Intergenic                        | Intergenic                        | -25375  | NR_038293 | 100507173 | Hs.635987            | NR_038292 HPRD:09096         |
| hESC-3merge_inp_peak_32  | chr1  | 161416814 | 161417131 | Intergenic                        | CpG                               | -58142  | NM_021642 | 2215      | Hs.352642            | NM_021642 HPRD:09096         |
| hESC-3merge_inp_peak_131 | chr16 | 14379556  | 14380055  | Intergenic                        | IRNA-Thr-ACC [RNA] [RNA]          | -18019  | NR_030177 | 574455    | NR_030177            | miRBase:MI0003137            |
| hESC-3merge_inp_peak_134 | chr16 | 22309597  | 22310096  | intron (NM_001258035, intron 1)   | MIIR[SINE] [MIR]                  | 1150    | NM_001258 | 55718     | Hs.460298            | NM_018119 HPRD:15655         |
| hESC-3merge_inp_peak_48  | chr1  | 228748040 | 228748539 | Intergenic                        | CpG                               | -32105  | NR_037962 | 58480     | Hs.647774            | NM_021205 HPRD:06965         |
| hESC-3merge_inp_peak_2   | chr1  | 16861541  | 16862040  | Intergenic                        | CpG                               | -13619  | NR_037446 | 100500876 | NR_037446            | miRBase:MI0016076            |
| hESC-3merge_inp_peak_280 | chr6  | 27745440  | 27745939  | Intergenic                        | IRNA-Met-I [RNA] [RNA]            | 16166   | NR_038929 | 10031289  | Hs.200573            | NR_038929 HPRD:08755         |
| hESC-3merge_inp_peak_76  | chr11 | 59333608  | 59334107  | Intergenic                        | IRNA-Phe-TTY [RNA] [RNA]          | 28774   | NR_036120 | 100422880 | NR_036120 HPRD:09729 |                              |
| hESC-3merge_inp_peak_146 | chr17 | 8028848   | 8029347   | Intergenic                        | IRNA-Gly-GGY [RNA] [RNA]          | -1687   | NR_001165 | 84667     | Hs.434838            | NR_001165 HPRD:03178         |
| hESC-3merge_inp_peak_190 | chr3  | 131950423 | 13195922  | Intergenic                        | IRNA-Cys-TGY [RNA] [RNA]          | -85539  | NM_001099 | 55        | Hs.433060            | NM_001099 HPRD:03178         |
| hESC-3merge_inp_peak_87  | chr12 | 98987978  | 98988297  | promoter-TSS (NR_038383)          | promoter-TSS (NR_038383)          | -414    | NR_038383 | 643707    | Hs.129589            | NR_038383 ENSG00000245017    |
| hESC-3merge_inp_peak_232 | chr6  | 26577109  | 26577608  | Intergenic                        | IRNA-Tyr-TAC [RNA] [RNA]          | -19813  | NM_013375 | 29777     | Hs.254406            | NM_013375 HPRD:16469         |
| hESC-3merge_inp_peak_339 | chr6  | 26989391  | 26989840  | promoter-TSS (NR_026777)          | promoter-TSS (NR_026777)          | -95     | NR_026776 | 10027046  | Hs.590428            | NR_026776 HPRD:08755         |
| hESC-3merge_inp_peak_329 | chr7  | 149112005 | 149112504 | Intergenic                        | IRNA-Cys-TGY [RNA] [RNA]          | 45799   | NM_015694 | 27153     | Hs.38512             | NM_015694 HPRD:13849         |
| hESC-3merge_inp_peak_161 | chr17 | 37310530  | 37311029  | Intergenic                        | IRNA-Cys-TGY [RNA] [RNA]          | -2877   | NM_020405 | 57125     | Hs.125036            | NM_020405 HPRD:08439         |
| hESC-3merge_inp_peak_62  | chr1  | 228779334 | 228779833 | promoter-TSS (NR_037962)          | promoter-TSS (NR_037962)          | -811    | NR_037962 | 58480     | Hs.647774            | NM_021205 HPRD:06965         |
| hESC-3merge_inp_peak_127 | chr16 | 3202688   | 3203187   | Intergenic                        | IRNA-Arg-AGG [RNA] [RNA]          | 17803   | NM_001134 | 7765      | Hs.115284            | NM_004220 HPRD:12224         |
| hESC-3merge_inp_peak_297 | chr6  | 28678141  | 28678640  | Intergenic                        | IRNA-Ala-GCY [RNA] [RNA]          | -123278 | NM_052923 | 114821    | Hs.176980            | NM_052923 HPRD:11720         |
| hESC-3merge_inp_peak_68  | chr10 | 42712495  | 42712994  | Intergenic                        | Intergenic                        | 150749  | NR_024380 | 441666    | Hs.255729            | NR_024380 ENSG00000215146    |
| hESC-3merge_inp_peak_44  | chr1  | 167684521 | 167685020 | Intergenic                        | IRNA-Pro-CCY [RNA] [RNA]          | -6417   | NM_024569 | 9019      | Hs.493919            | NM_003953 HPRD:05086         |
| hESC-3merge_inp_peak_139 | chr16 | 73512003  | 73512502  | Intergenic                        | IRNA-Lys-AAA [RNA] [RNA]          | 91548   | NR_038234 | 100506172 | Hs.434230            | NR_038234 ENSG00000258779    |
| hESC-3merge_inp_peak_246 | chr6  | 27198088  | 27198587  | Intergenic                        | IRNA-Leu-TTA [RNA] [RNA]          | -17165  | NM_005865 | 10279     | Hs.274407            | NM_005865 HPRD:06205         |
| hESC-3merge_inp_peak_123 | chr15 | 80036786  | 80037285  | Intergenic                        | IRNA-Cys-TGY [RNA] [RNA]          | 152304  | NR_037654 | 10588     | Hs.194294            | NM_006441 HPRD:06205         |
| hESC-3merge_inp_peak_110 | chr14 | 50329190  | 50329689  | Intergenic                        | 7S[RNA] [srpRNA] [srpRNA]         | -9900   | NM_004713 | 9147      | Hs.655964            | NM_004713 HPRD:08494         |
| hESC-3merge_inp_peak_152 | chr17 | 8125950   | 8125449   | non-coding (NR_026951, intron 1)  | non-coding (NR_026951, intron 1)  | 1162    | NR_026951 | 284029    | Hs.121692            | NM_173621 HPRD:08755         |
| hESC-3merge_inp_peak_264 | chr6  | 27543635  | 27544134  | Intergenic                        | IRNA-Lys-AAA [RNA] [RNA]          | -102987 | NM_007149 | 7738      | Hs.158174            | NM_007149 HPRD:03785         |
| hESC-3merge_inp_peak_343 | chr9  | 35657607  | 35658106  | promoter-TSS (NM_001195201)       | promoter-TSS (NM_001195201)       | 159     | NR_003051 | 6023      | Hs.587502            | NR_003051 ENSG00000269900    |
| hESC-3merge_inp_peak_203 | chr5  | 180528663 | 180529162 | Intergenic                        | IRNA-Leu-CTY [RNA] [RNA]          | 23392   | NM_001258 | 26693     | Hs.742585            | NM_001258283 ENSG00000185372 |
| hESC-3merge_inp_peak_95  | chr14 | 21077629  | 210776768 | Intergenic                        | IRNA-Pro-CCY [RNA] [RNA]          | -18536  | NM_001024 | 493901    | Hs.729466            | NM_001024822 HPRD:18667      |
| hESC-3merge_inp_peak_11  | chr1  | 145396658 | 145397157 | intron (NM_001039703, intron 1)   | IRNA-His-CAY [RNA] [RNA]          | -16284  | NM_013653 | 148738    | Hs.632436            | NM_145277 HPRD:10521         |
| hESC-3merge_inp_peak_177 | chr19 | 50490289  | 50490788  | intron (NM_001025778, intron 1)   | intron (NM_001025778, intron 1)   | 17626   | NR_002825 | 400709    | Hs.568076            | NR_002825 HPRD:00715         |
| hESC-3merge_inp_peak_185 | chr2  | 157257435 | 157257934 | Intergenic                        | IRNA-Gly-GGY [RNA] [RNA]          | -34281  | NM_001083 | 2820      | Hs.512382            | NM_001083 HPRD:00715         |
| hESC-3merge_inp_peak_19  | chr1  | 148006066 | 148006105 | intron (NR_102404, intron 1)      | IRNA-Asn-AAC [RNA] [RNA]          | 6709    | NR_104086 | 101954277 | NR_104086 HPRD:04229 |                              |
| hESC-3merge_inp_peak_159 | chr17 | 37025229  | 37025728  | promoter-TSS (NM_006148)          | promoter-TSS (NM_006148)          | -524    | NR_073284 | 3921      | Hs.741156            | NM_006148 HPRD:07388         |
| hESC-3merge_inp_peak_323 | chr7  | 4016171   | 4016670   | intron (NM_152744, intron 1)      | intron (NM_152744, intron 1)      | -152897 | NM_001079 | 221935    | Hs.653013            | NM_152744 HPRD:07388         |
| hESC-3merge_inp_peak_207 | chr5  | 180615213 | 180615712 | Intergenic                        | IRNA-Val-GTY [RNA] [RNA]          | 3446    | NR_108031 | 10257426  | Hs.277359            | NR_108031 HPRD:08755         |
| hESC-3merge_inp_peak_271 | chr6  | 27599028  | 27599527  | Intergenic                        | IRNA-Ile-ATA [RNA] [RNA]          | -62537  | NR_038293 | 100507173 | Hs.635987            | NR_038292 HPRD:08755         |
| hESC-3merge_inp_peak_217 | chr6  | 26319120  | 26319619  | Intergenic                        | IRNA-Trp-TGG [RNA] [RNA]          | -33642  | NM_003543 | 8365      | Hs.591790            | NM_003543 HPRD:11919         |
| hESC-3merge_inp_peak_8   | chr1  | 94312930  | 94313429  | promoter-TSS (NM_001261408)       | promoter-TSS (NM_001261408)       | -473    | NM_001261 | 8412      | Hs.36958             | NM_003567 HPRD:05268         |
| hESC-3merge_inp_peak_59  | chr1  | 228772641 | 228773140 | Intergenic                        | CpG                               | -7504   | NR_037962 | 58480     | Hs.647774            | NM_021205 HPRD:06965         |
| hESC-3merge_inp_peak_142 | chr6  | 90183335  | 90183834  | Intergenic                        | Intergenic                        | -41246  | NM_001098 | 11105     | Hs.406695            | NM_052996 HPRD:17903         |
| hESC-3merge_inp_peak_252 | chr6  | 27271352  | 27271851  | Intergenic                        | IRNA-Met-I [RNA] [RNA]            | 8410    | NM_023482 | 94026     | Hs.7299              |                              |

Supplementary Table 8

| PeakID (cmd=annotatePeaks.pl vA13_FHU002) | Chr        | Start     | End       | Strand | Peak Score | Focus Ratio/Region | Annotation                            | Detailed Annotation                   | Distance to TSS | Nearest PromoterID | Entrez ID | Nearest UniGene | Nearest RefSeq | Nearest Ensembl   |
|-------------------------------------------|------------|-----------|-----------|--------|------------|--------------------|---------------------------------------|---------------------------------------|-----------------|--------------------|-----------|-----------------|----------------|-------------------|
| vA13_FHU002_peak_22                       | chr19      | 27738477  | 27738958  | +      | 228        | NA                 | Intergenic                            | ALR/Alpha Satellite centr             | -545658         | NR_110688          | 101927151 | Hs.567934       | NR_110687      |                   |
| vA13_FHU002_peak_13                       | chr16      | 30968959  | 30969341  | +      | 199        | NA                 | 5' UTR (NM_014712, exon 1 of 19)      | 5' UTR (NM_014712, exon 1 of 19)      | 535             | NM_014712          | 9739      | Hs.297483       | NM_014712      | HPRD:13795        |
| vA13_FHU002_peak_31                       | chr5       | 10172     | 11694     | +      | 176        | NA                 | Intergenic                            | (CCCTAA)n Simple_repeat Simple_repeat | -129440         | NM_052909          | 153478    | Hs.535800       | NM_052909      |                   |
| vA13_FHU002_peak_12                       | chr12      | 132195401 | 132195624 | +      | 170        | NA                 | promoter-TSS (NM_001261411)           | promoter-TSS (NM_001261411)           | -120            | NM_004592          | 6433      | Hs.308171       | NM_004592      | HPRD:09055        |
| vA13_FHU002_peak_11                       | chr12      | 101801537 | 101801827 | +      | 164        | NA                 | promoter-TSS (NM_001301068)           | promoter-TSS (NM_001301068)           | -84             | NM_001301068       | 400       | Hs.372616       | NM_001177      | HPRD:04574        |
| vA13_FHU002_peak_28                       | chr3       | 9773178   | 9773443   | +      | 159        | NA                 | promoter-TSS (NM_004634)              | promoter-TSS (NM_004634)              | -124            | NM_001003694       | 7862      | Hs.1004         | NM_004634      | HPRD:03875        |
| vA13_FHU002_peak_5                        | chr10      | 42532092  | 42532859  | +      | 151        | NA                 | Intergenic                            | ALR/Alpha Satellite centr             | 331018          | NR_024380          | 441666    | Hs.255729       | NR_024380      | ENSG00000215146   |
| vA13_FHU002_peak_6                        | chr10      | 42534610  | 42534970  | +      | 122        | NA                 | Intergenic                            | ALR/Alpha Satellite centr             | 328703          | NR_024380          | 441666    | Hs.255729       | NR_024380      | ENSG00000215146   |
| vA13_FHU002_peak_4                        | chr10      | 42529539  | 42529898  | +      | 118        | NA                 | Intergenic                            | ALR/Alpha Satellite centr             | 333790          | NR_024380          | 441666    | Hs.255729       | NR_024380      | ENSG00000215146   |
| vA13_FHU002_peak_16                       | chr17      | 38804119  | 38804348  | +      | 112        | NA                 | promoter-TSS (NM_003079)              | promoter-TSS (NM_003079)              | -130            | NM_003079          | 6605      | Hs.743978       | NM_003079      | HPRD:04382        |
| vA13_FHU002_peak_30                       | chr4       | 191043812 | 191044163 | +      | 101        | NA                 | Intergenic                            | (TTAGGG)n Simple_repeat Simple_repeat | 58330           | NR_121644          | 100419743 |                 | NR_121644      |                   |
| vA13_FHU002_peak_20                       | chr19      | 27731972  | 27732756  | +      | 97         | NA                 | Intergenic                            | ALR/Alpha Satellite centr             | -52011          | NR_110688          | 101927151 | Hs.567934       | NR_110687      |                   |
| vA13_FHU002_peak_7                        | chr11      | 46838846  | 46839089  | +      | 90         | NA                 | promoter-TSS (NM_173811)              | promoter-TSS (NM_173811)              | 141             | NM_001142673       | 9776      | Hs.127403       | NM_014741      | HPRD:13809        |
| vA13_FHU002_peak_27                       | chr20      | 62918207  | 62918447  | +      | 89         | NA                 | Intergenic                            | (TTGGGG)n Simple_repeat Simple_repeat | -3411           | NR_040415          | 140849    | Hs.745565       | NR_040415      |                   |
| vA13_FHU002_peak_41                       | chrUn_g000 | 73748     | 73965     | +      | 84         | NA                 | intron (NR_109817, intron 1 of 2)     | (CCCTAA)n Simple_repeat Simple_repeat | 389             | NR_109817          | 441123    |                 | NR_109817      | ENSG00000170590   |
| vA13_FHU002_peak_2                        | chr10      | 42396516  | 42396920  | +      | 78         | NA                 | Intergenic                            | HSATII Satellite Satellite            | 466725          | NR_024380          | 441666    | Hs.255729       | NR_024380      | ENSG00000215146   |
| vA13_FHU002_peak_43                       | chrX       | 61719484  | 61719830  | +      | 73         | NA                 | Intergenic                            | ALR/Alpha Satellite centr             | 83155           | NM_001012968       | 139886    | Hs.612782       | NM_001012968   | HPRD:12556        |
| vA13_FHU002_peak_8                        | chr11      | 47447790  | 47448021  | +      | 68         | NA                 | 5' UTR (NM_002804, exon 1 of 12)      | 5' UTR (NM_002804, exon 1 of 12)      | 119             | NM_002804          | 5702      | Hs.250758       | NM_002804      | HPRD:01733        |
| vA13_FHU002_peak_32                       | chr7       | 24126     | 24332     | +      | 68         | NA                 | Intergenic                            | (LIMB3)LINE_LL                        | -125489         | NR_108065          | 100507642 |                 | NR_108064      |                   |
| vA13_FHU002_peak_44                       | chrY       | 13460982  | 13461224  | +      | 67         | NA                 | Intergenic                            | BSR/Beta Satellite Satellite          | 1072286         | NR_033667          | 352887    | Hs.546221       | NR_033667      | ENSG00000206159   |
| vA13_FHU002_peak_23                       | chr2       | 8987115   | 8987538   | +      | 64         | NA                 | Intergenic                            | (GAATG)n Satellite Satellite          | 76387           | NR_039635          | 10061399  |                 | NR_039635      | miRBase-Mi0016776 |
| vA13_FHU002_peak_10                       | chr12      | 4647628   | 4647841   | +      | 64         | NA                 | promoter-TSS (NM_001130862)           | promoter-TSS (NM_001130862)           | -97             | NM_020374          | 57102     | Hs.302977       | NM_020374      | HPRD:12609        |
| vA13_FHU002_peak_33                       | chr7       | 30634306  | 30634517  | +      | 60         | NA                 | 5' UTR (NM_002047, exon 1 of 17)      | 5' UTR (NM_002047, exon 1 of 17)      | 230             | NM_002047          | 2617      | Hs.404321       | NM_002047      | HPRD:02617        |
| vA13_FHU002_peak_18                       | chr18      | 18519335  | 18519671  | +      | 58         | NA                 | Intergenic                            | ALR/Alpha Satellite centr             | 172309          | NM_005406          | 6093      | Hs.306307       | NM_005406      |                   |
| vA13_FHU002_peak_42                       | chrUn_g000 | 118230    | 118451    | +      | 55         | NA                 | Intergenic                            | BSR/Beta Satellite Satellite          | 5730            | NM_00193798        | 100286867 | Hs.728749       | NM_00120511    |                   |
| vA13_FHU002_peak_36                       | chr8       | 43096628  | 43096963  | +      | 54         | NA                 | Intergenic                            | SAR Satellite Satellite               | -50790          | NM_001002920       | 340441    | Hs.531579       | NM_001002920   |                   |
| vA13_FHU002_peak_39                       | chrUn_g000 | 64454     | 65133     | +      | 51         | NA                 | Intergenic                            | NA                                    | NA              | NA                 | NA        |                 | NA             |                   |
| vA13_FHU002_peak_14                       | chr16      | 46424723  | 46425048  | +      | 49         | NA                 | Intergenic                            | HSATII Satellite Satellite            | 178124          | NR_026556          | 124149    | Hs.97414        | NM_001004299   |                   |
| vA13_FHU002_peak_1                        | chr10      | 42394306  | 42394558  | +      | 46         | NA                 | Intergenic                            | Intergenic                            | 46906           | NR_024380          | 441666    | Hs.255729       | NR_024380      | ENSG00000215146   |
| vA13_FHU002_peak_35                       | chr8       | 43094801  | 43095185  | +      | 42         | NA                 | Intergenic                            | SAR Satellite Satellite               | -52592          | NM_001002920       | 340441    | Hs.531579       | NM_001002920   |                   |
| vA13_FHU002_peak_9                        | chr11      | 51592945  | 51593169  | +      | 38         | NA                 | Intergenic                            | ALR/Alpha Satellite centr             | 77775           | NM_001004703       | 119749    | Hs.553564       | NM_001004703   | HPRD:14964        |
| vA13_FHU002_peak_15                       | chr16      | 46428162  | 46428429  | +      | 36         | NA                 | Intergenic                            | HSATII Satellite Satellite            | 174714          | NR_026556          | 124149    | Hs.97414        | NM_001004299   |                   |
| vA13_FHU002_peak_25                       | chr2       | 92319678  | 92320165  | +      | 36         | NA                 | Intergenic                            | ALR/Alpha Satellite centr             | 190862          | NR_027714          | 440388    | Hs.760239       | NM_00103241    | ENSG00000226481   |
| vA13_FHU002_peak_34                       | chr8       | 43092912  | 43093188  | +      | 34         | NA                 | Intergenic                            | SAR Satellite Satellite               | -54535          | NM_001002920       | 340441    | Hs.531579       | NM_001002920   |                   |
| vA13_FHU002_peak_3                        | chr10      | 42400193  | 42400661  | +      | 34         | NA                 | Intergenic                            | ALR/Alpha Satellite centr             | 463066          | NR_024380          | 441666    | Hs.255729       | NR_024380      | ENSG00000215146   |
| vA13_FHU002_peak_24                       | chr2       | 89878482  | 89878779  | +      | 26         | NA                 | Intergenic                            | (GAATG)n Satellite Satellite          | 766746          | NR_039635          | 10061399  |                 | NR_039635      | miRBase-Mi0016776 |
| vA13_FHU002_peak_38                       | chr9       | 6697176   | 66971603  | +      | 25         | NA                 | Intergenic                            | ALR/Alpha Satellite centr             | 48472           | NR_121570          | 101928381 | Hs.708686       | NR_121570      |                   |
| vA13_FHU002_peak_19                       | chr19      | 7515624   | 7515855   | +      | 22         | NA                 | intron (NM_001130955, intron 5 of 19) | intron (NM_001130955, intron 5 of 19) | 11185           | NM_001130955       | 237102    | Hs.465761       | NM_015138      | HPRD:12479        |
| vA13_FHU002_peak_40                       | chrUn_g000 | 102129    | 102432    | +      | 22         | NA                 | Intergenic                            | BSR/Beta Satellite Satellite          | NA              | NA                 | NA        |                 | NA             |                   |
| vA13_FHU002_peak_37                       | chr8       | 43826912  | 43827355  | +      | 17         | NA                 | Intergenic                            | ALR/Alpha Satellite centr             | 679548          | NM_001005365       | 340441    | Hs.531579       | NM_001005365   |                   |
| vA13_FHU002_peak_21                       | chr19      | 2773190   | 2773453   | +      | 16         | NA                 | Intergenic                            | ALR/Alpha Satellite centr             | -54705          | NR_110688          | 101927151 | Hs.567934       | NR_110687      |                   |
| vA13_FHU002_peak_26                       | chr20      | 26318271  | 26318480  | +      | 16         | NA                 | Intergenic                            | ALR/Alpha Satellite centr             | -128506         | NR_040095          | 284801    | Hs.370699       | NR_040095      | ENSG00000227195   |
| vA13_FHU002_peak_17                       | chr18      | 10236     | 10623     | +      | 14         | NA                 | Intergenic                            | (CCCTAA)n Simple_repeat Simple_repeat | -1646           | NR_110795          | 102723376 | Hs.606852       | NR_110795      |                   |
| vA13_FHU002_peak_29                       | chr4       | 49156597  | 49156898  | +      | 13         | NA                 | Intergenic                            | (CATC)n Satellite Satellite           | 168088          | NM_001286791       | 80157     | Hs.479703       | NM_025087      | HPRD:08638        |

| <b>Supplementary Table 9</b> |                                                              |
|------------------------------|--------------------------------------------------------------|
| <b>Technique</b>             | <b>Sequence</b>                                              |
| <i>RT-qPCR</i>               |                                                              |
| pre tRNA Leu F               | GTC AGG ATG GCC GAG TGG TCT AAG                              |
| pre tRNA Leu R               | CCA CGC CTC CAT ACG GAGAAC CAG AAG ACC C                     |
| pre tRNA Arg F               | GGCTCTGTGGCGCAATGGATA                                        |
| pre tRNAArg R                | TTCGAACCCACAACCTTTGAATTGCTC                                  |
| tRNA-TYR F                   | CCTTCGATAGCTCAGCTGGTAGAGCGGAGG                               |
| tRNA-TYR R                   | CGGAATTGAACCAGCGACCTAAGGATGTCC                               |
| hRPC32 RT-F1                 | TGGCTGGGAATAAAGGAAGA                                         |
| hRPC32 RT-R1                 | GGAAATAGTGGGGGTGGTTT                                         |
| hNANOG RT-F                  | AGAAGGCCTCAGCACCTAC                                          |
| hNANOG RT-R                  | GGCCTGATTGTTCCAGGATT                                         |
| hPAX6 RT-F                   | GAATCAGAGAAGACAGGCCA                                         |
| hPAX6 RT-R                   | GTGTAGGTATCATAACTCCG                                         |
| hTERT RT-F                   | CCA AGT TCC TGC ACT GGC TGA                                  |
| hTERT RT-R                   | TTC CCG ATG CTG CCT GAC                                      |
| <i>ChIP qPCR</i>             |                                                              |
| 5S F                         | AGGACAGCTGGTGTCTGGAG                                         |
| 5S R                         | GTTTTTGAGCACCCGGTTT                                          |
| tRNA MET F                   | GGCAAGGTATGCTCACATCA                                         |
| tRNA MET R                   | CATAACCCAGAGGTCGATGG                                         |
| tRNA ARG F                   | CGATAGCTGCCAAGAACCAT                                         |
| tRNA ARG R                   | CCCAGTGGCCTAATGGATAA                                         |
| tRNA LYS F                   | GCGGACATCGTAAACCCTTA                                         |
| tRNA LYS R                   | CACTGTGCCAGACCTCGATA                                         |
| tRNA SEC F                   | GTTACTACCGCCCGAAAGGT                                         |
| tRNA SEC R                   | TATAGCTGCGCGGAATAAG                                          |
| tRNA LEU F                   | CCGATCGTAGGGCTTCCTAT                                         |
| tRNA LEU R                   | GACTCCAAGTCTCCGTGAGC                                         |
| ILF2 F                       | CATAACCCAGAGGTCGATGG                                         |
| ILF2 R                       | TGGTTGCATTTTGAGGTAGG                                         |
| POLG F                       | TCTCAAGGAGCAGGTGGATT                                         |
| POLG R                       | TCCGAAGTCAGACGCCTTAT                                         |
| LTA4H F                      | GACGGGGAGGCACAGTAAT                                          |
| LTA4H R                      | ATGTTGGCTTTCTCCGTTTG                                         |
| JUND F                       | GTCGCTCATTTGCATGGAG                                          |
| JUND R                       | ATGACGTCAACCCACAAGG                                          |
| SMARCC2 F                    | TAAGGCGTTGGACTCGAAAT                                         |
| SMARCC2 R                    | GAGCAACAGAGCGAGACTCC                                         |
| CpG (FOS) F                  | CCAGCAACAGGCTTCTGATT                                         |
| CpG (FOS) R                  | CAAGTGGGAGACAACAACCA                                         |
| <i>Northern Probes</i>       |                                                              |
| U2                           | GGGTGCACCGTTCCTGGAGGTAC                                      |
| tRNA ARG (CCT)               | GGGTGGGACTCGAACCCACAATCCCTGGCTTAGGAGGCCAATGCCT               |
| tRNA ARG (CCG)               | CAGCTCCGAGGCTGATGCCTTA                                       |
| tRNA CYS                     | ACCCGGATTTGAACCGGGGACCTCTTGATCTGCAGTCAAATGCTCTACCCTGAGCTATAT |
| tRNA GLY                     | AATTGAACCCGGGTCTCCCGCTGGGAGGCGAGAATTCTACCA                   |
| tRNA THR                     | TCGAACCCAGGATCTCTGTTTACTAGACAGGCGCTTTAACCAGCT                |
| tRNA Ala                     | ATTGAACCCGGGCTCATACTGCAAAGCATGCGCT                           |
| tRNA Asn                     | GGGTGGGCTCGAACCAACCTTTTCGGTTAACAGCCGAACGCGCT                 |
| tRNA Glu                     | TGGGTGAAAACAGGAATCCTAACCGCTAGACCATG                          |



|  |                   |
|--|-------------------|
|  |                   |
|  |                   |
|  |                   |
|  |                   |
|  |                   |
|  |                   |
|  |                   |
|  |                   |
|  |                   |
|  |                   |
|  | F-forward primer  |
|  | R- Reverse primer |

**Supplementary Table 10**

| <b>BT code</b> | <b>Age</b> | <b>Ethnicity</b> | <b>Disease Stage</b> | <b>Tumor Histology</b> | <b>ER status</b> | <b>PR status</b> | <b>HER2 status</b> |
|----------------|------------|------------------|----------------------|------------------------|------------------|------------------|--------------------|
| BT0011         | 51         | Chinese          | IV                   | Invasive duct          | Negative         | Negative         | Negative           |
| BT0031         | 68         | Chinese          | I                    | Ductal carcin          | Negative         | Negative         | Negative           |
| BT0064         | 72         | Chinese          | IIB                  | Invasive duct          | Negative         | Negative         | Negative           |
| BT0098         | 44         | Chinese          | I                    | Invasive duct          | Negative         | Negative         | Negative           |
| BT00216        | 41         | Chinese          | IIIA                 | Invasive duct          | Negative         | Negative         | Negative           |
| BT0038         | 75         | Chinese          | IIB                  | Invasive duct          | Negative         | Negative         | Positive           |
| BT0048         | 79         | Chinese          | IIA                  | Invasive duct          | Negative         | Negative         | Positive           |
| BT0086         | 39         | Chinese          | IIA                  | Invasive duct          | Negative         | Negative         | Positive           |
| BT0087         | 56         | Chinese          | IV                   | Invasive duct          | Negative         | Negative         | Positive           |
| BT0090         | 57         | Chinese          | I                    | Invasive duct          | Negative         | Negative         | Positive           |
| BT0075         | 50         | Malay            | IV                   | Invasive duct          | Negative         | Negative         | Negative           |
| BT00260        | 45         | Chinese          | IIIC                 | Invasive duct          | Positive         | Positive         | Negative           |
| BT00222        | 53         | Chinese          | IIB                  | Invasive duct          | Positive         | Positive         | Negative           |
| BT00224        | 64         | Chinese          | IIB                  | Invasive duct          | Positive         | Positive         | Negative           |
| BT00207        | 37         | Chinese          | IIB                  | Invasive duct          | Positive         | Positive         | Negative           |

| <b>Supplementary table 11</b>           |            |        |           |                   |
|-----------------------------------------|------------|--------|-----------|-------------------|
| <b>Fig 1A</b>                           |            |        |           |                   |
| Table Analyzed                          |            |        |           |                   |
| Data 1                                  |            |        |           |                   |
| One-way analysis of variance            |            |        |           |                   |
| P value                                 | 0.0051     |        |           |                   |
| P value summary                         | **         |        |           |                   |
| Are means signif. different? (P < 0.05) | Yes        |        |           |                   |
| Number of groups                        | 3          |        |           |                   |
| F                                       | 10.05      |        |           |                   |
| R squared                               | 0.6907     |        |           |                   |
| ANOVA Table                             |            |        |           |                   |
|                                         | SS         | df     | MS        |                   |
| Treatment (between columns)             | 255        | 2      | 127.5     |                   |
| Residual (within columns)               | 114.2      | 9      | 12.69     |                   |
| Total                                   | 369.2      | 11     |           |                   |
| Tukey's Multiple Comparison Test        |            |        |           |                   |
|                                         | Mean Diff. | q      | P value   | 95% CI of diff    |
| G361 vs BLM                             | -8.625     | 4.843  | P < 0.05  | -15.66 to -1.592  |
| G361 vs LOXIMVI                         | -10.63     | 5.966  | P < 0.01  | -17.66 to -3.592  |
| BLM vs LOXIMVI                          | -2         | 1.123  | P > 0.05  | -9.033 to 5.033   |
| <b>Figure 1F HCT</b>                    |            |        |           |                   |
| Table Analyzed                          |            |        |           |                   |
| Data 1                                  |            |        |           |                   |
| One-way analysis of variance            |            |        |           |                   |
| P value                                 | P<0.0001   |        |           |                   |
| P value summary                         | ***        |        |           |                   |
| Are means signif. different? (P < 0.05) | Yes        |        |           |                   |
| Number of groups                        | 3          |        |           |                   |
| F                                       | 119.4      |        |           |                   |
| R squared                               | 0.9755     |        |           |                   |
| ANOVA Table                             |            |        |           |                   |
|                                         | SS         | df     | MS        |                   |
| Treatment (between columns)             | 3.98       | 2      | 1.99      |                   |
| Residual (within columns)               | 0.1        | 6      | 0.01667   |                   |
| Total                                   | 4.08       | 8      |           |                   |
| Tukey's Multiple Comparison Test        |            |        |           |                   |
|                                         | Mean Diff. | q      | P value   | 95% CI of diff    |
| HCT 116 Control vs HCT 116 TERT WT      | -1.3       | 17.44  | P < 0.001 | -1.623 to -0.9766 |
| HCT 116 Control vs HCT 116 TERT DN      | -1.5       | 20.12  | P < 0.001 | -1.823 to -1.177  |
| HCT 116 TERT WT vs HCT 116 TERT DN      | -0.2       | 2.683  | P > 0.05  | -0.5234 to 0.1234 |
| <b>Figure 1F A2780</b>                  |            |        |           |                   |
| Table Analyzed                          |            |        |           |                   |
| Data 1                                  |            |        |           |                   |
| One-way analysis of variance            |            |        |           |                   |
| P value                                 | 0.0011     |        |           |                   |
| P value summary                         | **         |        |           |                   |
| Are means signif. different? (P < 0.05) | Yes        |        |           |                   |
| Number of groups                        | 3          |        |           |                   |
| F                                       | 26.12      |        |           |                   |
| R squared                               | 0.897      |        |           |                   |
| ANOVA Table                             |            |        |           |                   |
|                                         | SS         | df     | MS        |                   |
| Treatment (between columns)             | 0.9867     | 2      | 0.4933    |                   |
| Residual (within columns)               | 0.1133     | 6      | 0.01889   |                   |
| Total                                   | 1.1        | 8      |           |                   |
| Tukey's Multiple Comparison Test        |            |        |           |                   |
|                                         | Mean Diff. | q      | P value   | 95% CI of diff    |
| A2780 Control vs A2780 TERT WT          | -0.6667    | 8.402  | P < 0.01  | -1.011 to -0.3224 |
| A2780 Control vs A2780 TERT DN          | -0.7333    | 9.242  | P < 0.01  | -1.078 to -0.3890 |
| A2780 TERT WT vs A2780 TERT DN          | -0.06667   | 0.8402 | P > 0.05  | -0.4110 to 0.2776 |

|                                            |            |        |           |                     |
|--------------------------------------------|------------|--------|-----------|---------------------|
| <b>Figure 1F VA13</b>                      |            |        |           |                     |
| Table Analyzed                             |            |        |           |                     |
| Data 1                                     |            |        |           |                     |
| One-way analysis of variance               |            |        |           |                     |
| P value                                    | P<0.0001   |        |           |                     |
| P value summary                            | ***        |        |           |                     |
| Are means signif. different? (P < 0.05)    | Yes        |        |           |                     |
| Number of groups                           | 3          |        |           |                     |
| F                                          | 189        |        |           |                     |
| R squared                                  | 0.9844     |        |           |                     |
| ANOVA Table                                |            |        |           |                     |
|                                            | SS         | df     | MS        |                     |
| Treatment (between columns)                | 23.1       | 2      | 11.55     |                     |
| Residual (within columns)                  | 0.3667     | 6      | 0.06111   |                     |
| Total                                      | 23.46      | 8      |           |                     |
| Tukey's Multiple Comparison Test           |            |        |           |                     |
|                                            | Mean Diff. | q      | P value   | 95% CI of diff      |
| VA13 Control vs VA13 TERT WT               | -3.1       | 21.72  | P < 0.001 | -3.719 to -2.481    |
| VA13 Control vs VA13 TERT DN               | -3.633     | 25.46  | P < 0.001 | -4.253 to -3.014    |
| VA13 TERT WT vs VA13 TERT DN               | -0.5333    | 3.737  | P > 0.05  | -1.153 to 0.08595   |
| <b>Figure 6A</b>                           |            |        |           |                     |
| Table Analyzed                             |            |        |           |                     |
| Data 1                                     |            |        |           |                     |
| One-way analysis of variance               |            |        |           |                     |
| P value                                    | P<0.0001   |        |           |                     |
| P value summary                            | ***        |        |           |                     |
| Are means signif. different? (P < 0.05)    | Yes        |        |           |                     |
| Number of groups                           | 3          |        |           |                     |
| F                                          | 16.65      |        |           |                     |
| R squared                                  | 0.5812     |        |           |                     |
| Bartlett's test for equal variances        |            |        |           |                     |
| Bartlett's statistic (corrected)           | 12.91      |        |           |                     |
| P value                                    | 0.0016     |        |           |                     |
| P value summary                            | **         |        |           |                     |
| Do the variances differ signif. (P < 0.05) | Yes        |        |           |                     |
| ANOVA Table                                |            |        |           |                     |
|                                            | SS         | df     | MS        |                     |
| Treatment (between columns)                | 1.689      | 2      | 0.8445    |                     |
| Residual (within columns)                  | 1.217      | 24     | 0.05071   |                     |
| Total                                      | 2.906      | 26     |           |                     |
| Tukey's Multiple Comparison Test           |            |        |           |                     |
|                                            | Mean Diff. | q      | P value   | 95% CI of diff      |
| Vector1 vs TERT                            | -0.5981    | 7.968  | P < 0.001 | -0.8632 to -0.3330  |
| Vector1 vs RPC32                           | -0.414     | 5.516  | P < 0.01  | -0.6791 to -0.1489  |
| TERT vs RPC32                              | 0.184      | 2.452  | P > 0.05  | -0.08107 to 0.4491  |
| <b>Figure 6D</b>                           |            |        |           |                     |
| Table Analyzed                             |            |        |           |                     |
| Data 1                                     |            |        |           |                     |
| One-way analysis of variance               |            |        |           |                     |
| P value                                    | P<0.0001   |        |           |                     |
| P value summary                            | ***        |        |           |                     |
| Are means signif. different? (P < 0.05)    | Yes        |        |           |                     |
| Number of groups                           | 7          |        |           |                     |
| F                                          | 36.72      |        |           |                     |
| R squared                                  | 0.9402     |        |           |                     |
| ANOVA Table                                |            |        |           |                     |
|                                            | SS         | df     | MS        |                     |
| Treatment (between columns)                | 4.623      | 6      | 0.7705    |                     |
| Residual (within columns)                  | 0.2938     | 14     | 0.02099   |                     |
| Total                                      | 4.917      | 20     |           |                     |
| Tukey's Multiple Comparison Test           |            |        |           |                     |
|                                            | Mean Diff. | q      | P value   | 95% CI of diff      |
| VECTOR vs TERT                             | -0.9356    | 11.19  | P < 0.001 | -1.340 to -0.5317   |
| VECTOR vs TERT DN                          | -1.303     | 15.58  | P < 0.001 | -1.707 to -0.8991   |
| VECTOR vs TERT 1-600                       | -1.395     | 16.68  | P < 0.001 | -1.799 to -0.9912   |
| VECTOR vs TERT 601-1132                    | -0.8213    | 9.82   | P < 0.001 | -1.225 to -0.4175   |
| VECTOR vs TERT 1-925                       | -0.9816    | 11.74  | P < 0.001 | -1.385 to -0.5777   |
| VECTOR vs TERT 346-925                     | -0.305     | 3.647  | P > 0.05  | -0.7089 to 0.09887  |
| TERT vs TERT DN                            | -0.3673    | 4.392  | P > 0.05  | -0.7712 to 0.03655  |
| TERT vs TERT 1-600                         | -0.4595    | 5.493  | P < 0.05  | -0.8633 to -0.05556 |
| TERT vs TERT 601-1132                      | 0.1143     | 1.366  | P > 0.05  | -0.2896 to 0.5182   |
| TERT vs TERT 1-925                         | -0.04596   | 0.5495 | P > 0.05  | -0.4498 to 0.3579   |
| TERT vs TERT 346-925                       | 0.6306     | 7.54   | P < 0.01  | 0.2267 to 1.034     |
| TERT DN vs TERT 1-600                      | -0.09211   | 1.101  | P > 0.05  | -0.4960 to 0.3118   |
| TERT DN vs TERT 601-1132                   | 0.4816     | 5.758  | P < 0.05  | 0.07774 to 0.8855   |
| TERT DN vs TERT 1-925                      | 0.3214     | 3.843  | P > 0.05  | -0.08251 to 0.7253  |
| TERT DN vs TERT 346-925                    | 0.9979     | 11.93  | P < 0.001 | 0.5941 to 1.402     |
| TERT 1-600 vs TERT 601-1132                | 0.5737     | 6.86   | P < 0.01  | 0.1698 to 0.9776    |
| TERT 1-600 vs TERT 1-925                   | 0.4135     | 4.944  | P < 0.05  | 0.009609 to 0.8174  |
| TERT 1-600 vs TERT 346-925                 | 1.09       | 13.03  | P < 0.001 | 0.6862 to 1.494     |
| TERT 601-1132 vs TERT 1-925                | -0.1602    | 1.916  | P > 0.05  | -0.5641 to 0.2436   |
| TERT 601-1132 vs TERT 346-925              | 0.5163     | 6.173  | P < 0.01  | 0.1124 to 0.9202    |
| TERT 1-925 vs TERT 346-925                 | 0.6766     | 8.089  | P < 0.001 | 0.2727 to 1.080     |

**Figure 7A**

|                                         |            |       |           |                |
|-----------------------------------------|------------|-------|-----------|----------------|
| Table Analyzed                          |            |       |           |                |
| Data 1                                  |            |       |           |                |
| One-way analysis of variance            |            |       |           |                |
| P value                                 | P<0.0001   |       |           |                |
| P value summary                         | ***        |       |           |                |
| Are means signif. different? (P < 0.05) | Yes        |       |           |                |
| Number of groups                        | 3          |       |           |                |
| F                                       | 126.5      |       |           |                |
| R squared                               | 0.9656     |       |           |                |
| ANOVA Table                             |            |       |           |                |
| Treatment (between columns)             | 82890000   | 2     | 41450000  |                |
| Residual (within columns)               | 2949000    | 9     | 327700    |                |
| Total                                   | 85840000   | 11    |           |                |
| Tukey's Multiple Comparison Test        |            |       |           |                |
|                                         | Mean Diff. | q     | P value   | 95% CI of diff |
| BLM C250T Day3 vs BLM WT Day3           | 6430       | 22.47 | P < 0.001 | 5300 to 7560   |
| BLM C250T Day3 vs BLM WT + RPC32 Day3   | 3490       | 12.19 | P < 0.001 | 2360 to 4620   |
| BLM WT Day3 vs BLM WT + RPC32 Day3      | -2940      | 10.27 | P < 0.001 | -4070 to -1810 |

**Figure 7B**

|                                                             |            |       |           |                |
|-------------------------------------------------------------|------------|-------|-----------|----------------|
| Table Analyzed                                              |            |       |           |                |
| Data 1                                                      |            |       |           |                |
| One-way analysis of variance                                |            |       |           |                |
| P value                                                     | P<0.0001   |       |           |                |
| P value summary                                             | ***        |       |           |                |
| Are means signif. different? (P < 0.05)                     | Yes        |       |           |                |
| Number of groups                                            | 6          |       |           |                |
| F                                                           | 77.13      |       |           |                |
| R squared                                                   | 0.9554     |       |           |                |
| ANOVA Table                                                 |            |       |           |                |
| Treatment (between columns)                                 | 89920000   | 5     | 17980000  |                |
| Residual (within columns)                                   | 4197000    | 18    | 233100    |                |
| Total                                                       | 94110000   | 23    |           |                |
| Tukey's Multiple Comparison Test                            |            |       |           |                |
|                                                             | Mean Diff. | q     | P value   | 95% CI of diff |
| BLM C250T + Vector Day 4 vs BLM WT + Vector Day 4           | 5976       | 24.75 | P < 0.001 | 4891 to 7061   |
| BLM C250T + Vector Day 4 vs BLM WT + TERT Day 4             | 2407       | 9.97  | P < 0.001 | 1322 to 3492   |
| BLM C250T + Vector Day 4 vs BLM WT + TERT DN Day 4          | 3053       | 12.65 | P < 0.001 | 1968 to 4138   |
| BLM C250T + Vector Day 4 vs BLM WT + TERT 601-1132 Day 4    | 3642       | 15.09 | P < 0.001 | 2557 to 4727   |
| BLM C250T + Vector Day 4 vs BLM WT + TERT 346-925 Day 4     | 5167       | 21.4  | P < 0.001 | 4082 to 6252   |
| BLM WT + Vector Day 4 vs BLM WT + TERT Day 4                | -3569      | 14.78 | P < 0.001 | -4654 to -2484 |
| BLM WT + Vector Day 4 vs BLM WT + TERT DN Day 4             | -2923      | 12.11 | P < 0.001 | -4008 to -1838 |
| BLM WT + Vector Day 4 vs BLM WT + TERT 601-1132 Day 4       | -2334      | 9.667 | P < 0.001 | -3419 to -1249 |
| BLM WT + Vector Day 4 vs BLM WT + TERT 346-925 Day 4        | -809       | 3.351 | P > 0.05  | -1894 to 276.2 |
| BLM WT + TERT Day 4 vs BLM WT + TERT DN Day 4               | 646        | 2.676 | P > 0.05  | -439.2 to 1731 |
| BLM WT + TERT Day 4 vs BLM WT + TERT 601-1132 Day 4         | 1235       | 5.115 | P < 0.05  | 149.8 to 2320  |
| BLM WT + TERT Day 4 vs BLM WT + TERT 346-925 Day 4          | 2760       | 11.43 | P < 0.001 | 1675 to 3845   |
| BLM WT + TERT DN Day 4 vs BLM WT + TERT 601-1132 Day 4      | 589        | 2.44  | P > 0.05  | -496.2 to 1674 |
| BLM WT + TERT DN Day 4 vs BLM WT + TERT 346-925 Day 4       | 2114       | 8.756 | P < 0.001 | 1029 to 3199   |
| BLM WT + TERT 601-1132 Day 4 vs BLM WT + TERT 346-925 Day 4 | 1525       | 6.317 | P < 0.01  | 439.8 to 2610  |

**Figure 7D**

|                                            |            |        |           |                  |
|--------------------------------------------|------------|--------|-----------|------------------|
| Table Analyzed                             |            |        |           |                  |
| Data 1                                     |            |        |           |                  |
| One-way analysis of variance               |            |        |           |                  |
| P value                                    | P<0.0001   |        |           |                  |
| P value summary                            | ***        |        |           |                  |
| Are means signif. different? (P < 0.05)    | Yes        |        |           |                  |
| Number of groups                           | 5          |        |           |                  |
| F                                          | 44.74      |        |           |                  |
| R squared                                  | 0.8173     |        |           |                  |
| Bartlett's test for equal variances        |            |        |           |                  |
| Bartlett's statistic (corrected)           | 9.054      |        |           |                  |
| P value                                    | 0.0598     |        |           |                  |
| P value summary                            | ns         |        |           |                  |
| Do the variances differ signif. (P < 0.05) | No         |        |           |                  |
| ANOVA Table                                |            |        |           |                  |
| Treatment (between columns)                | 452000     | 4      | 113000    |                  |
| Residual (within columns)                  | 101000     | 40     | 2526      |                  |
| Total                                      | 553000     | 44     |           |                  |
| Tukey's Multiple Comparison Test           |            |        |           |                  |
|                                            | Mean Diff. | q      | P value   | 95% CI of diff   |
| BLM WT vs BLM WT + RPC32                   | -85.92     | 5.129  | P < 0.01  | -153.6 to -18.26 |
| BLM WT vs BLM WT + TERT DN                 | -96        | 5.56   | P < 0.01  | -165.7 to -26.26 |
| BLM WT vs BLM WT + TERT                    | -130.8     | 7.808  | P < 0.001 | -198.5 to -63.15 |
| BLM WT vs BLM C250T                        | -295.5     | 18.1   | P < 0.001 | -361.4 to -229.5 |
| BLM WT + RPC32 vs BLM WT + TERT DN         | -10.08     | 0.5838 | P > 0.05  | -79.83 to 59.67  |
| BLM WT + RPC32 vs BLM WT + TERT            | -44.89     | 2.68   | P > 0.05  | -112.6 to 22.77  |
| BLM WT + RPC32 vs BLM C250T                | -209.6     | 12.83  | P < 0.001 | -275.5 to -143.6 |
| BLM WT + TERT DN vs BLM WT + TERT          | -34.81     | 2.016  | P > 0.05  | -104.6 to 34.94  |
| BLM WT + TERT DN vs BLM C250T              | -199.5     | 11.83  | P < 0.001 | -267.6 to -131.4 |
| BLM WT + TERT vs BLM C250T                 | -164.7     | 10.09  | P < 0.001 | -230.6 to -98.73 |

|                                                  |                      |        |           |                   |
|--------------------------------------------------|----------------------|--------|-----------|-------------------|
| <b>Figure 7E</b>                                 |                      |        |           |                   |
| Table Analyzed                                   |                      |        |           |                   |
| Data 1                                           |                      |        |           |                   |
| One-way analysis of variance                     |                      |        |           |                   |
| P value                                          | P<0.0001             |        |           |                   |
| P value summary                                  | ***                  |        |           |                   |
| Are means signif. different? (P < 0.05)          | Yes                  |        |           |                   |
| Number of groups                                 | 5                    |        |           |                   |
| F                                                | 19.89                |        |           |                   |
| R squared                                        | 0.8884               |        |           |                   |
| ANOVA Table                                      | SS                   | df     | MS        |                   |
| Treatment (between columns)                      | 3.099                | 4      | 0.7749    |                   |
| Residual (within columns)                        | 0.3895               | 10     | 0.03895   |                   |
| Total                                            | 3.489                | 14     |           |                   |
| Tukey's Multiple Comparison Test                 | Mean Diff.           | q      | P value   | 95% CI of diff    |
| BLM WT + Vector vs BLM WT + RPC32                | -0.9547              | 8.378  | P < 0.01  | -1.485 to -0.4244 |
| BLM WT + Vector vs BLM WT + TERT DN              | -1.071               | 9.397  | P < 0.001 | -1.601 to -0.5404 |
| BLM WT + Vector vs BLM WT + TERT WT              | -0.9987              | 8.765  | P < 0.001 | -1.529 to -0.4684 |
| BLM WT + Vector vs BLM C250T + Vector            | -1.331               | 11.68  | P < 0.001 | -1.861 to -0.8003 |
| BLM WT + RPC32 vs BLM WT + TERT DN               | -0.116               | 1.018  | P > 0.05  | -0.6463 to 0.4143 |
| BLM WT + RPC32 vs BLM WT + TERT WT               | -0.04402             | 0.3863 | P > 0.05  | -0.5743 to 0.4863 |
| BLM WT + RPC32 vs BLM C250T + Vector             | -0.376               | 3.299  | P > 0.05  | -0.9063 to 0.1544 |
| BLM WT + TERT DN vs BLM WT + TERT WT             | 0.07201              | 0.632  | P > 0.05  | -0.4583 to 0.6023 |
| BLM WT + TERT DN vs BLM C250T + Vector           | -0.2599              | 2.281  | P > 0.05  | -0.7902 to 0.2704 |
| BLM WT + TERT WT vs BLM C250T + Vector           | -0.3319              | 2.913  | P > 0.05  | -0.8622 to 0.1984 |
| <b>Figure 8B</b>                                 |                      |        |           |                   |
| Table Analyzed                                   | Data 1               |        |           |                   |
| Column A                                         | PyMT Tert WT tRNA    |        |           |                   |
| vs                                               |                      |        |           |                   |
| Column B                                         | PyMT TERT KO tRNA    |        |           |                   |
| Unpaired t test                                  |                      |        |           |                   |
| P value                                          | 0.0042               |        |           |                   |
| P value summary                                  | **                   |        |           |                   |
| Are means signif. different? (P < 0.05)          | Yes                  |        |           |                   |
| One- or two-tailed P value?                      | Two-tailed           |        |           |                   |
| t, df                                            | t=5.871 df=4         |        |           |                   |
| How big is the difference?                       |                      |        |           |                   |
| Mean ± SEM of column A                           | 1.361 ± 0.1413 N=3   |        |           |                   |
| Mean ± SEM of column B                           | 0.3533 ± 0.09757 N=3 |        |           |                   |
| Difference between means                         | 1.008 ± 0.1717       |        |           |                   |
| 95% confidence interval                          | 0.5314 to 1.485      |        |           |                   |
| R squared                                        | 0.896                |        |           |                   |
| F test to compare variances                      |                      |        |           |                   |
| F,DFn, Dfd                                       | 2.098, 2, 2          |        |           |                   |
| P value                                          | 0.3228               |        |           |                   |
| P value summary                                  | ns                   |        |           |                   |
| Are variances significantly different?           | No                   |        |           |                   |
| <b>Figure S7A</b>                                |                      |        |           |                   |
| Table Analyzed                                   |                      |        |           |                   |
| Data 1                                           |                      |        |           |                   |
| One-way analysis of variance                     |                      |        |           |                   |
| P value                                          | 0.0002               |        |           |                   |
| P value summary                                  | ***                  |        |           |                   |
| Are means signif. different? (P < 0.05)          | Yes                  |        |           |                   |
| Number of groups                                 | 5                    |        |           |                   |
| F                                                | 11.01                |        |           |                   |
| R squared                                        | 0.7459               |        |           |                   |
| ANOVA Table                                      | SS                   | df     | MS        |                   |
| Treatment (between columns)                      | 3337000              | 4      | 834300    |                   |
| Residual (within columns)                        | 1137000              | 15     | 75780     |                   |
| Total                                            | 4474000              | 19     |           |                   |
| Tukey's Multiple Comparison Test                 | Mean Diff.           | q      | P value   | 95% CI of diff    |
| shControl Day 4 vs shTERT3 Day 4                 | 1265                 | 9.191  | P < 0.001 | 663.9 to 1866     |
| shControl Day 4 vs shTERT3 + TERT Day 4          | 494                  | 3.589  | P > 0.05  | -107.1 to 1095    |
| shControl Day 4 vs shTERT3 + TERT DN Day 4       | 434                  | 3.153  | P > 0.05  | -167.1 to 1035    |
| shControl Day 4 vs shTERT3 + RPC32 Day 4         | 478                  | 3.473  | P > 0.05  | -123.1 to 1079    |
| shTERT3 Day 4 vs shTERT3 + TERT Day 4            | -771                 | 5.602  | P < 0.01  | -1372 to -169.9   |
| shTERT3 Day 4 vs shTERT3 + TERT DN Day 4         | -831                 | 6.037  | P < 0.01  | -1432 to -229.9   |
| shTERT3 Day 4 vs shTERT3 + RPC32 Day 4           | -787                 | 5.718  | P < 0.01  | -1388 to -185.9   |
| shTERT3 + TERT Day 4 vs shTERT3 + TERT DN Day 4  | -60                  | 0.4359 | P > 0.05  | -661.1 to 541.1   |
| shTERT3 + TERT Day 4 vs shTERT3 + RPC32 Day 4    | -16                  | 0.1162 | P > 0.05  | -617.1 to 585.1   |
| shTERT3 + TERT DN Day 4 vs shTERT3 + RPC32 Day 4 | 44                   | 0.3197 | P > 0.05  | -557.1 to 645.1   |

| <b>Figure S7B</b>                                |            |          |           |                    |
|--------------------------------------------------|------------|----------|-----------|--------------------|
| Table Analyzed                                   |            |          |           |                    |
| Data 1                                           |            |          |           |                    |
| One-way analysis of variance                     |            |          |           |                    |
| P value                                          |            | 0.0001   |           |                    |
| P value summary                                  | ***        |          |           |                    |
| Are means signif. different? (P < 0.05)          | Yes        |          |           |                    |
| Number of groups                                 |            | 5        |           |                    |
| F                                                |            | 12.66    |           |                    |
| R squared                                        |            | 0.7715   |           |                    |
| ANOVA Table                                      |            |          |           |                    |
|                                                  | SS         | df       | MS        |                    |
| Treatment (between columns)                      | 7639000    | 4        | 1910000   |                    |
| Residual (within columns)                        | 2263000    | 15       | 150800    |                    |
| Total                                            | 9902000    | 19       |           |                    |
| Tukey's Multiple Comparison Test                 |            |          |           |                    |
|                                                  | Mean Diff. | q        | P value   | 95% CI of diff     |
| shControl Day 4 vs shTERT3 Day 4                 | 1752       | 9.022    | P < 0.001 | 904.0 to 2600      |
| shControl Day 4 vs shTERT3 + TERT Day 4          | 246        | 1.267    | P > 0.05  | -602.0 to 1094     |
| shControl Day 4 vs shTERT3 + TERT DN Day 4       | 319        | 1.643    | P > 0.05  | -529.0 to 1167     |
| shControl Day 4 vs shTERT3 + RPC32 Day 4         | 738        | 3.8      | P > 0.05  | -110.0 to 1586     |
| shTERT3 Day 4 vs shTERT3 + TERT Day 4            | -1506      | 7.755    | P < 0.001 | -2354 to -658.0    |
| shTERT3 Day 4 vs shTERT3 + TERT DN Day 4         | -1433      | 7.379    | P < 0.001 | -2281 to -585.0    |
| shTERT3 Day 4 vs shTERT3 + RPC32 Day 4           | -1014      | 5.222    | P < 0.05  | -1862 to -166.0    |
| shTERT3 + TERT Day 4 vs shTERT3 + TERT DN Day 4  | 73         | 0.3759   | P > 0.05  | -775.0 to 921.0    |
| shTERT3 + TERT Day 4 vs shTERT3 + RPC32 Day 4    | 492        | 2.534    | P > 0.05  | -356.0 to 1340     |
| shTERT3 + TERT DN Day 4 vs shTERT3 + RPC32 Day 4 | 419        | 2.158    | P > 0.05  | -429.0 to 1267     |
| <b>Figure S7D</b>                                |            |          |           |                    |
| Table Analyzed                                   |            |          |           |                    |
| Data 1                                           |            |          |           |                    |
| One-way analysis of variance                     |            |          |           |                    |
| P value                                          |            | P<0.0001 |           |                    |
| P value summary                                  | ***        |          |           |                    |
| Are means signif. different? (P < 0.05)          | Yes        |          |           |                    |
| Number of groups                                 |            | 5        |           |                    |
| F                                                |            | 56.03    |           |                    |
| R squared                                        |            | 0.9573   |           |                    |
| ANOVA Table                                      |            |          |           |                    |
|                                                  | SS         | df       | MS        |                    |
| Treatment (between columns)                      | 13480      | 4        | 3370      |                    |
| Residual (within columns)                        | 601.4      | 10       | 60.14     |                    |
| Total                                            | 14080      | 14       |           |                    |
| Tukey's Multiple Comparison Test                 |            |          |           |                    |
|                                                  | Mean Diff. | q        | P value   | 95% CI of diff     |
| Control vs shTERT 3                              | 87.9       | 19.63    | P < 0.001 | 67.06 to 108.7     |
| Control vs shTERT3 + TERT                        | 65.4       | 14.61    | P < 0.001 | 44.56 to 86.24     |
| Control vs shTERT3 + TERT DN                     | 68         | 15.19    | P < 0.001 | 47.16 to 88.84     |
| Control vs shTERT3 + RPC32                       | 67         | 14.96    | P < 0.001 | 46.16 to 87.84     |
| shTERT 3 vs shTERT3 + TERT                       | -22.5      | 5.025    | P < 0.05  | -43.34 to -1.662   |
| shTERT 3 vs shTERT3 + TERT DN                    | -19.9      | 4.445    | P > 0.05  | -40.74 to 0.9379   |
| shTERT 3 vs shTERT3 + RPC32                      | -20.9      | 4.668    | P < 0.05  | -41.74 to -0.06207 |
| shTERT3 + TERT vs shTERT3 + TERT DN              | 2.6        | 0.5807   | P > 0.05  | -18.24 to 23.44    |
| shTERT3 + TERT vs shTERT3 + RPC32                | 1.6        | 0.3573   | P > 0.05  | -19.24 to 22.44    |
| shTERT3 + TERT DN vs shTERT3 + RPC32             | -1         | 0.2233   | P > 0.05  | -21.84 to 19.84    |
| <b>Figure S8B</b>                                |            |          |           |                    |
| Table Analyzed                                   |            |          |           |                    |
| Data 1                                           |            |          |           |                    |
| One-way analysis of variance                     |            |          |           |                    |
| P value                                          |            | P<0.0001 |           |                    |
| P value summary                                  | ***        |          |           |                    |
| Are means signif. different? (P < 0.05)          | Yes        |          |           |                    |
| Number of groups                                 |            | 4        |           |                    |
| F                                                |            | 54.56    |           |                    |
| R squared                                        |            | 0.9534   |           |                    |
| ANOVA Table                                      |            |          |           |                    |
|                                                  | SS         | df       | MS        |                    |
| Treatment (between columns)                      | 0.8972     | 3        | 0.2991    |                    |
| Residual (within columns)                        | 0.04385    | 8        | 0.005482  |                    |
| Total                                            | 0.9411     | 11       |           |                    |
| Tukey's Multiple Comparison Test                 |            |          |           |                    |
|                                                  | Mean Diff. | q        | P value   | 95% CI of diff     |
| BLM WT vs BLM WT + TERT                          | -0.3048    | 7.132    | P < 0.01  | -0.4984 to -0.1113 |
| BLM WT vs BLM WT + TERT 346-925                  | 0.001115   | 0.02609  | P > 0.05  | -0.1925 to 0.1947  |
| BLM WT vs BLM C250T                              | -0.6633    | 15.52    | P < 0.001 | -0.8569 to -0.4697 |
| BLM WT + TERT vs BLM WT + TERT 346-925           | 0.306      | 7.158    | P < 0.01  | 0.1124 to 0.4996   |
| BLM WT + TERT vs BLM C250T                       | -0.3584    | 8.385    | P < 0.01  | -0.5520 to -0.1648 |
| BLM WT + TERT 346-925 vs BLM C250T               | -0.6644    | 15.54    | P < 0.001 | -0.8580 to -0.4708 |

# Uncut blots for Figure 1G-H

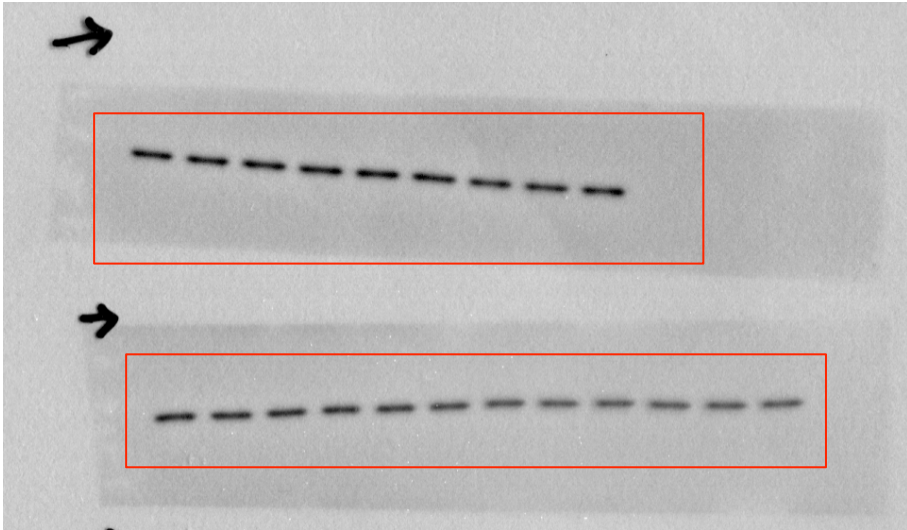

Figure 1H

Figure 1G





# Uncut blots for Figure 5

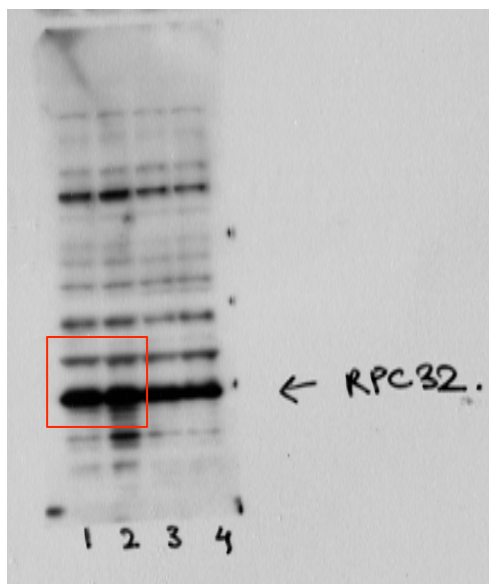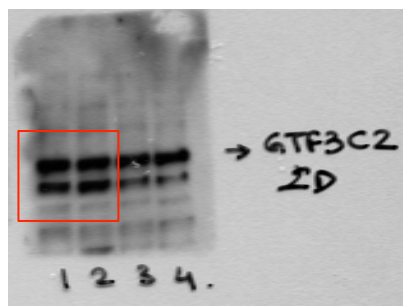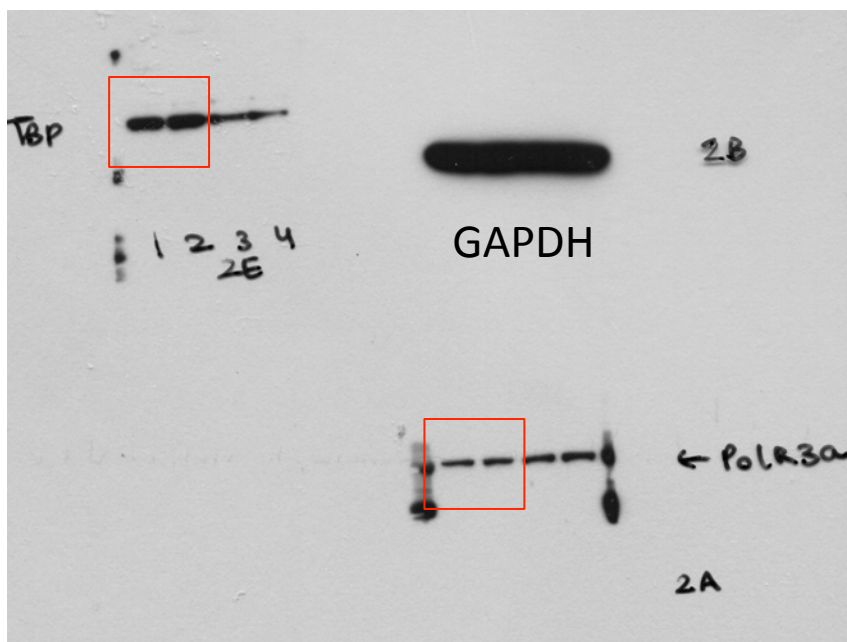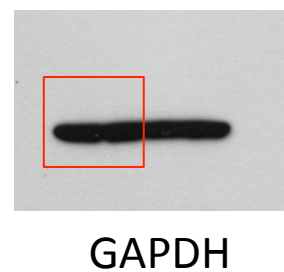

# Uncut blots for Figure 6C

IP Flag; WB:Flag

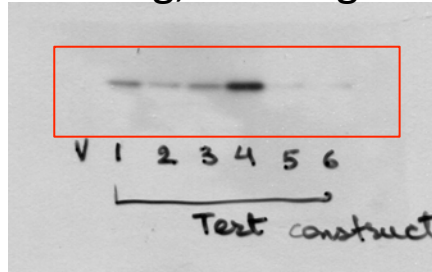

IP Flag; WB:HA

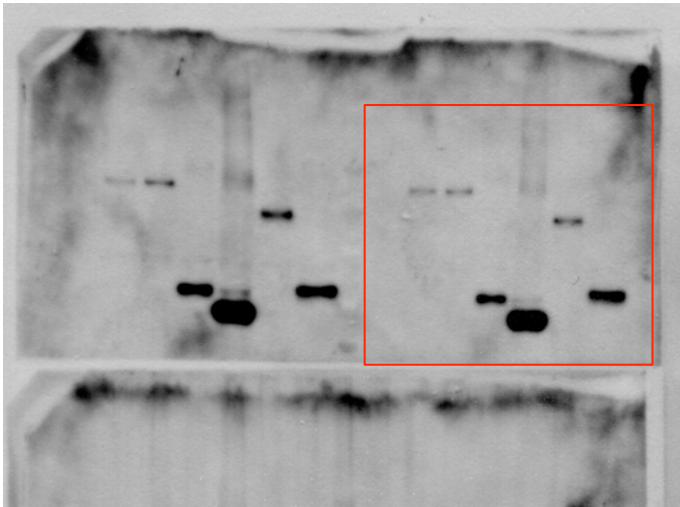

Input; WB:Flag

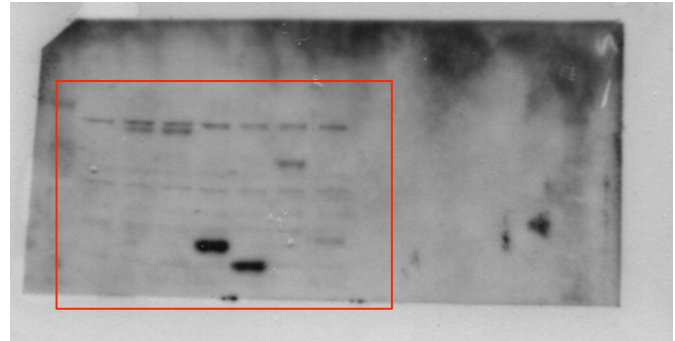

Input; WB:HA

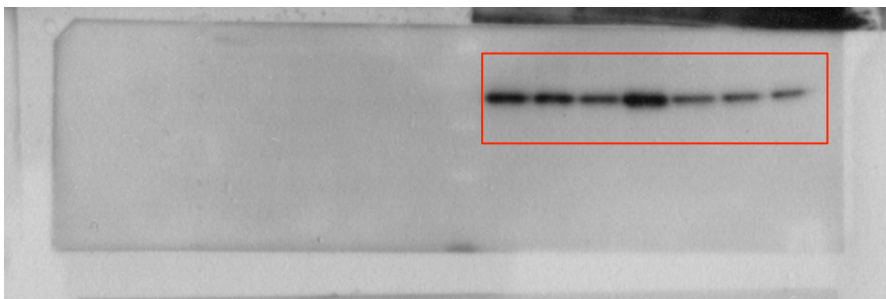

Input; WB:GAPDH

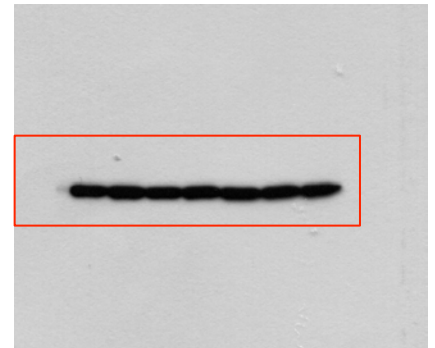

# Uncut blots for Figure 6E-6F

## Figure 6E Coomassie gel

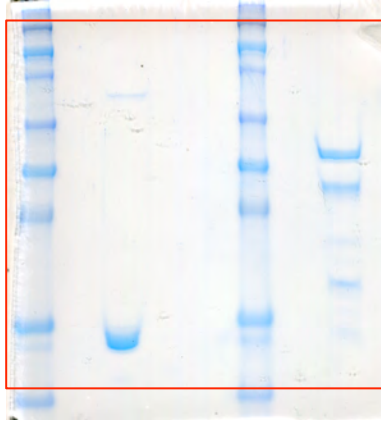

## Figure 6F

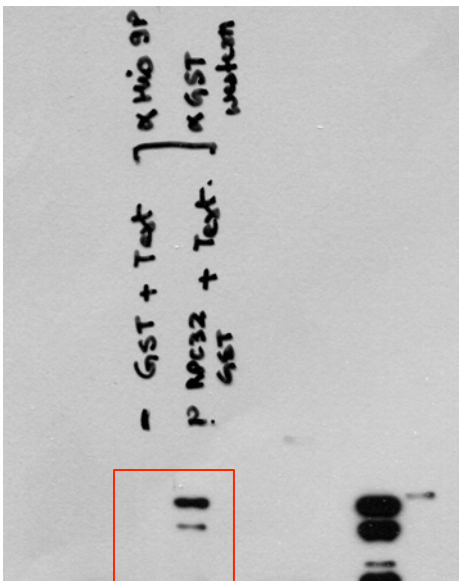

## Figure 6F

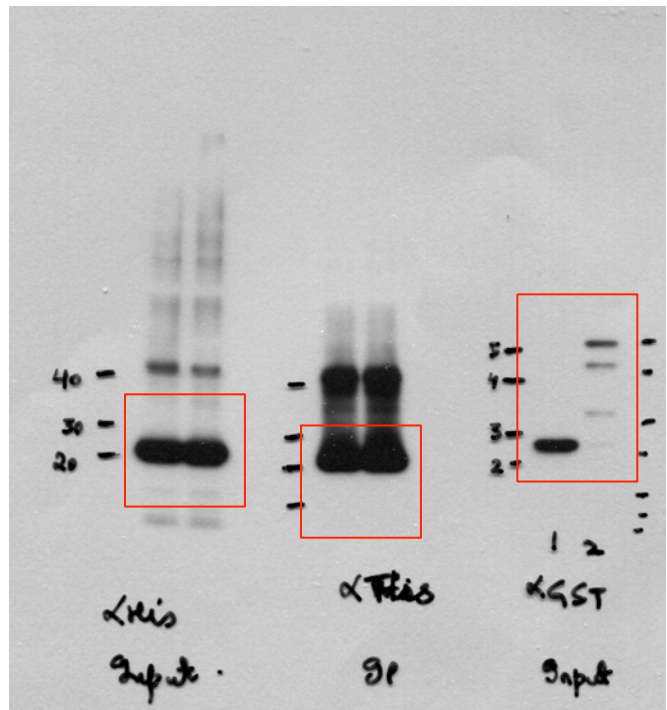

# Uncut blots for figure 6G-H

Figure 6G

Figure 6H

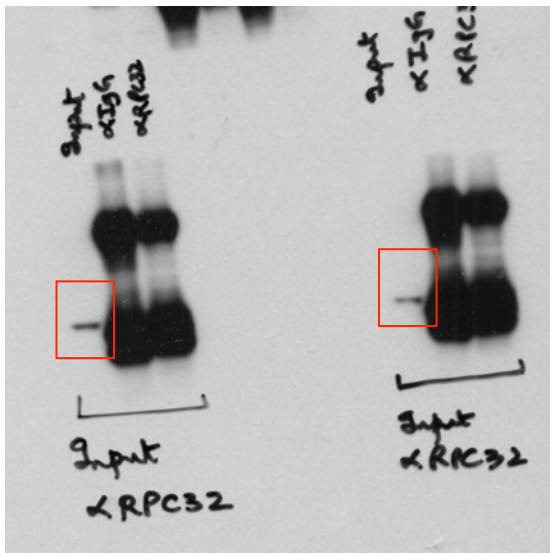

Figure 6G

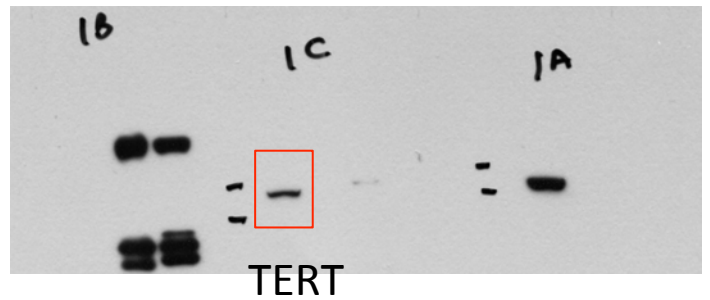

Figure 6H

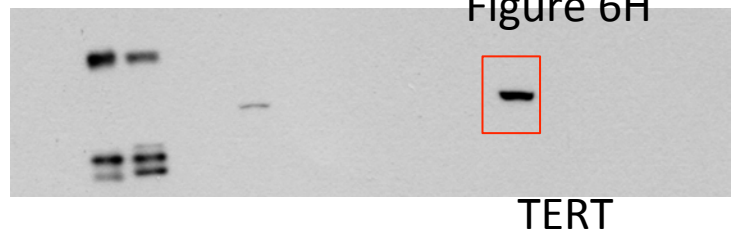

Figure 6G

Figure 6H

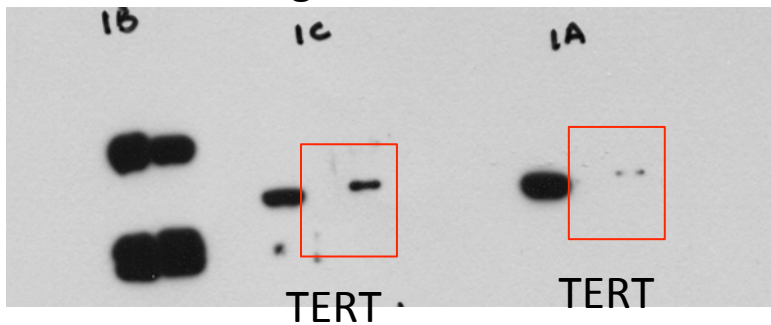

Figure 6G

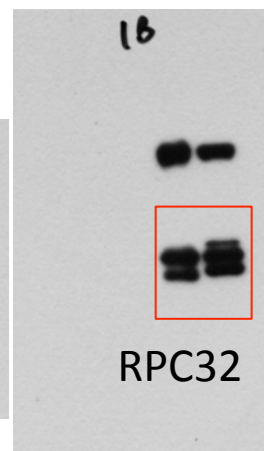

Figure 6H

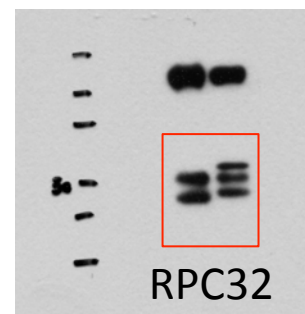

Figure 6G

Figure 6H

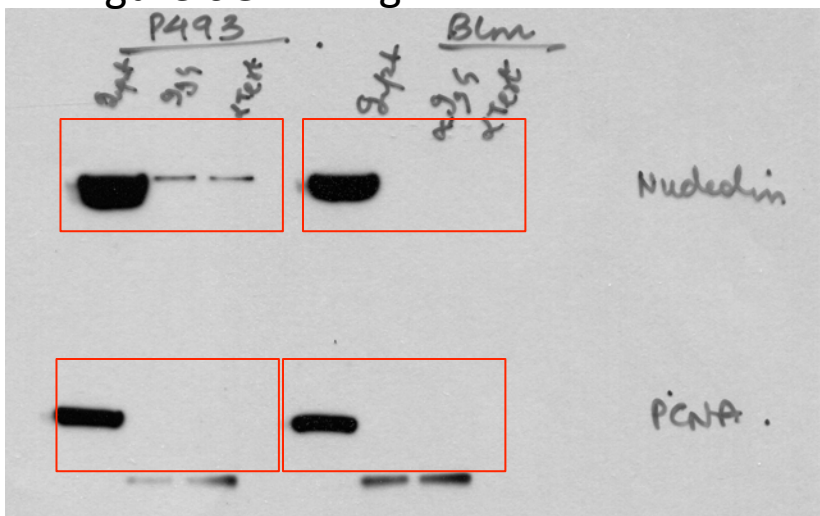

Figure 6G

Figure 6H

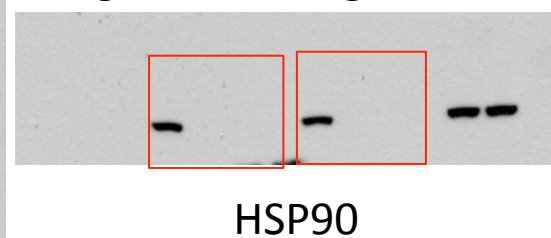

## Uncut blots for Figure S6B

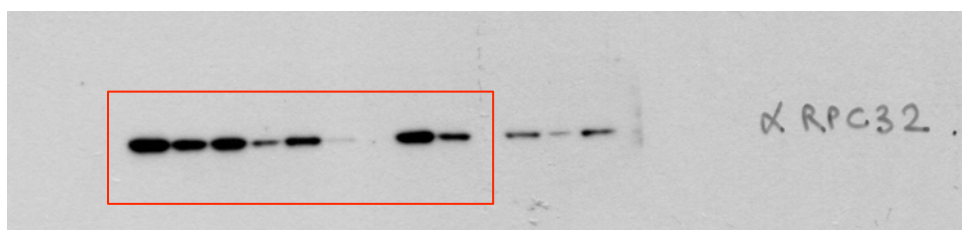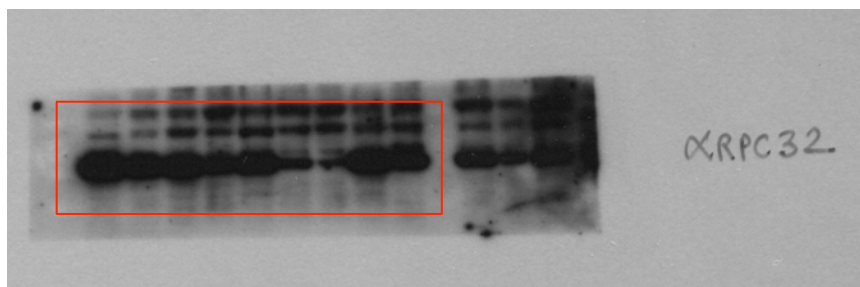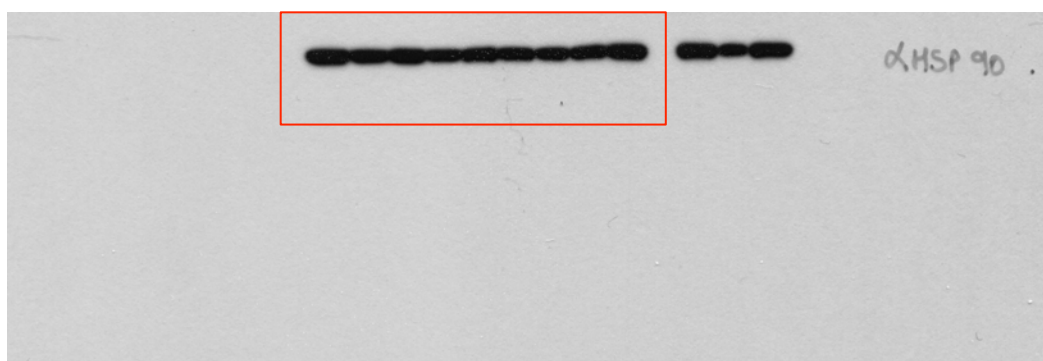

## Uncut blots for Figure S6C

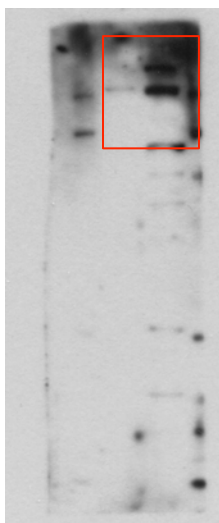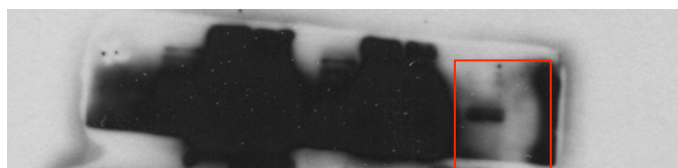



# Uncut blots for figure 4C

tRNA Ala

tRNA Asn

tRNA Cys

rRNA

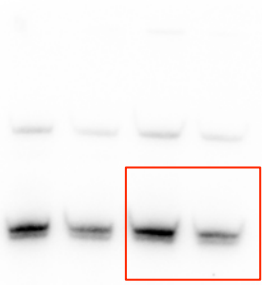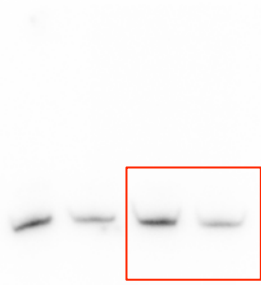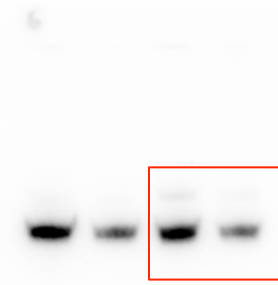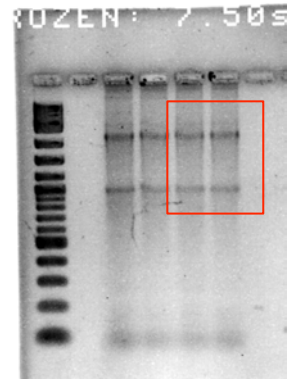

tRNA Lys

tRNA Arg CCG

tRNA Arg CCT

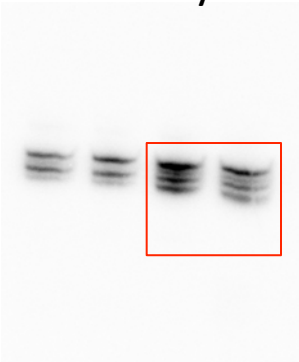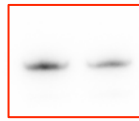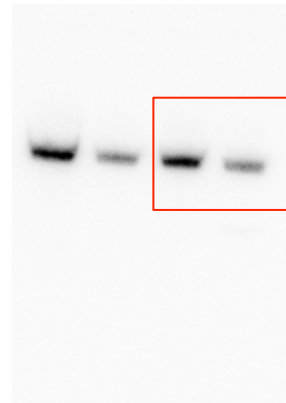

U2

tRNA thr

tRNA Glu

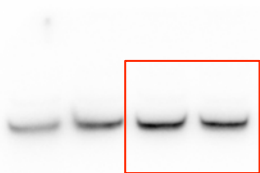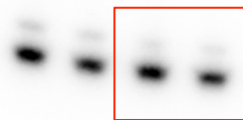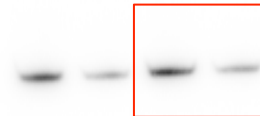

# Uncut blots for figure 4E

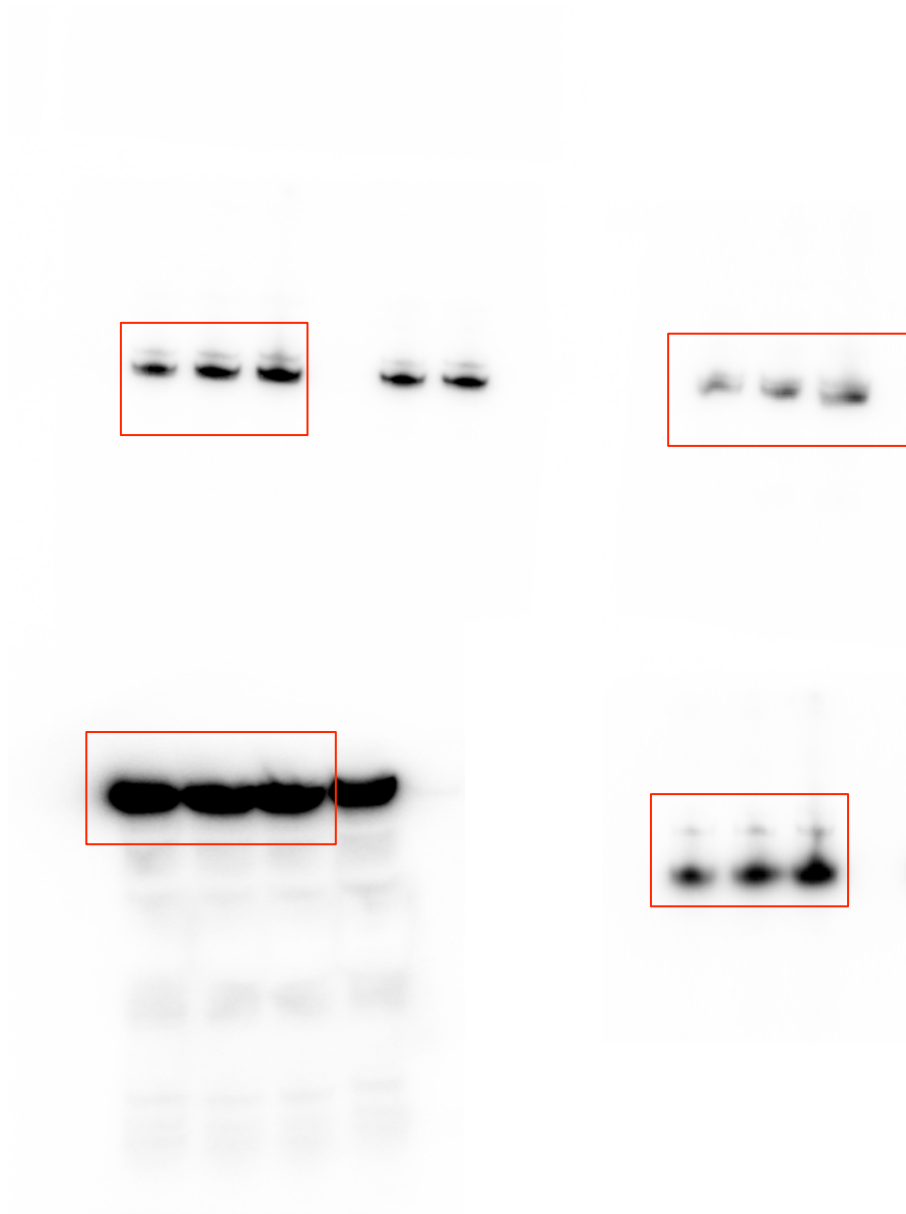



Uncut blots for figure 4D

tRNA Arg CCT

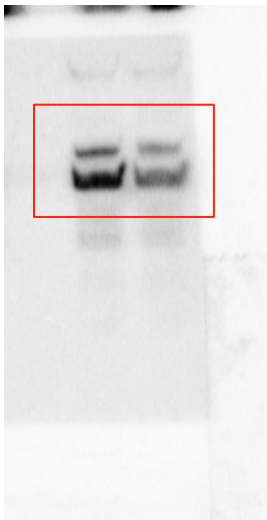

tRNA Arg CCG

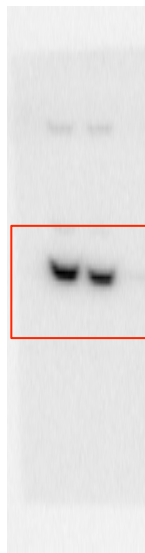

U2 RNA

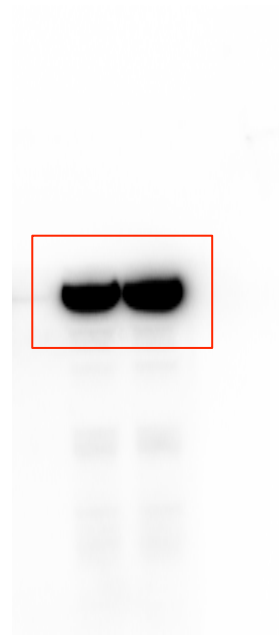

Supplement: jci-126-86042-s001.pdf [file jci-126-86042-s001.pdf]
